# Supplementary material for: Inhibition of O-GlcNAc transferase activates type I interferon-dependent antitumor immunity by bridging cGAS-STING pathway
Source: eLife. 2024 Oct 4;13:RP94849. doi: 10.7554/eLife.94849 (PMC11452177; doi:10.7554/eLife.94849)
Supplement: Supplementary file 2. [file elife-94849-supp2.xlsx]

## Sheet: Proteins
										KO+GFP_#1	KO+GFP_#2	KO+GFP_#3	KO+WT_#4	KO+WT_#5	KO+WT_#6	KO+GFP_#1	KO+GFP_#2	KO+GFP_#3	KO+WT_#4	KO+WT_#5	KO+WT_#6
Protein FDR Confidence: Combined	Accession	Description	# PSMs	# Peptides	# Unique Peptides	MW [kDa]	Coverage [%]	# AAs	calc. pI	# PSMs: A2	# PSMs: B2	# PSMs: C2	# PSMs: D2	# PSMs: E2	# PSMs: F2	# Peptides: A2	# Peptides: B2	# Peptides: C2	# Peptides: D2	# Peptides: E2	# Peptides: F2
High	P35579	Myosin-9 OS=Homo sapiens OX=9606 GN=MYH9 PE=1 SV=4	6611	165	135	226.4	67	1960	5.6	872	926	1036	224	345	233	145	143	140	93	113	96
High	Q9U6Y5	SWISS-PROT:Q9U6Y5 Green fluorescent protein (GFP-Cter-HisTag)	4079	24	24	28.1	69	249	6.52	951	1033	927	200	186	189	23	23	20	10	9	10
High	Q7Z406	Myosin-14 OS=Homo sapiens OX=9606 GN=MYH14 PE=1 SV=2	3222	140	126	227.7	65	1995	5.6	482	489	515	118	168	128	124	123	122	75	84	77
High	O15294	UDP-N-acetylglucosamine--peptide N-acetylglucosaminyltransferase 110 kDa subunit OS=Homo sapiens OX=9606 GN=OGT PE=1 SV=3	2542	54	54	116.9	61	1046	6.7			2	293	483	327			2	37	39	38
High	P49792	E3 SUMO-protein ligase RanBP2 OS=Homo sapiens OX=9606 GN=RANBP2 PE=1 SV=2	2241	182	127	358	67	3224	6.2	8	11	13	40	44	37	8	11	13	39	42	35
High	P60709	Actin, cytoplasmic 1 OS=Homo sapiens OX=9606 GN=ACTB PE=1 SV=1	2101	25	10	41.7	74	375	5.48	246	268	268	120	147	118	21	21	21	16	15	16
High	P05787	SWISS-PROT:P05787 Tax_Id=9606 Gene_Symbol=KRT8 Keratin, type II cytoskeletal 8	1908	49	19	53.7	83	483	5.59	383	423	460	85	106	84	48	46	46	30	31	31
High	Q15149	Plectin OS=Homo sapiens OX=9606 GN=PLEC PE=1 SV=3	1463	228	220	531.5	53	4684	5.96	212	220	226	99	113	101	178	182	182	94	104	97
High	P68133	Actin, alpha skeletal muscle OS=Homo sapiens OX=9606 GN=ACTA1 PE=1 SV=1	1270	19	6	42	54	377	5.39	122	124	161	98	91	96	13	15	14	12	10	14
High	P51610	Host cell factor 1 OS=Homo sapiens OX=9606 GN=HCFC1 PE=1 SV=2	1227	61	61	208.6	44	2035	7.46		1		161	193	173		1		49	54	47
High	P35580	Myosin-10 OS=Homo sapiens OX=9606 GN=MYH10 PE=1 SV=3	1221	109	82	228.9	56	1976	5.54	162	178	176	48	73	53	90	89	90	36	44	37
High	Q13813	Spectrin alpha chain, non-erythrocytic 1 OS=Homo sapiens OX=9606 GN=SPTAN1 PE=1 SV=3	1055	141	141	284.4	68	2472	5.35	165	176	183	37	46	38	113	119	121	37	45	38
High	P78527	DNA-dependent protein kinase catalytic subunit OS=Homo sapiens OX=9606 GN=PRKDC PE=1 SV=3	1009	159	159	468.8	42	4128	7.12	143	144	127	67	73	65	127	126	111	63	71	63
High	Q01082	Spectrin beta chain, non-erythrocytic 1 OS=Homo sapiens OX=9606 GN=SPTBN1 PE=1 SV=2	907	127	116	274.4	63	2364	5.57	147	151	139	27	33	27	101	107	100	26	33	27
High	Q09666	Neuroblast differentiation-associated protein AHNAK OS=Homo sapiens OX=9606 GN=AHNAK PE=1 SV=2	903	172	172	628.7	59	5890	6.15	60	61	90	75	93	76	55	53	77	68	77	68
High	P08727	Keratin, type I cytoskeletal 19 OS=Homo sapiens OX=9606 GN=KRT19 PE=1 SV=4	859	40	25	44.1	79	400	5.14	204	195	217	35	46	37	38	38	38	22	22	22
High	P05783	Keratin, type I cytoskeletal 18 OS=Homo sapiens OX=9606 GN=KRT18 PE=1 SV=2	803	30	20	48	61	430	5.45	161	160	164	44	52	42	29	26	27	19	19	18
High	P60660	Myosin light polypeptide 6 OS=Homo sapiens OX=9606 GN=MYL6 PE=1 SV=2	782	13	9	16.9	85	151	4.65	106	121	122	44	49	47	11	12	13	8	8	9
High	H-INV:HIT000292931	Tax_Id=9606 Gene_Symbol=- Similar to Keratin, type II cytoskeletal 8	771	24	1	49.4	44	443	5.2	163	167	176	32	44	34	24	24	22	14	15	15
High	A6NHR9	Structural maintenance of chromosomes flexible hinge domain-containing protein 1 OS=Homo sapiens OX=9606 GN=SMCHD1 PE=1 SV=2	769	93	93	226.2	49	2005	7.3	5	4	5	91	113	92	5	4	5	62	69	59
High	Q8WWI1	LIM domain only protein 7 OS=Homo sapiens OX=9606 GN=LMO7 PE=1 SV=3	745	73	73	192.6	42	1683	8.09	114	107	108	32	37	33	63	63	56	29	30	30
High	P35749	Myosin-11 OS=Homo sapiens OX=9606 GN=MYH11 PE=1 SV=3	716	26	1	227.2	12	1972	5.5	95	94	105	27	52	32	24	23	20	15	20	17
High	P07437	Tubulin beta chain OS=Homo sapiens OX=9606 GN=TUBB PE=1 SV=2	676	25	4	49.6	73	444	4.89	98	97	88	44	54	46	23	25	24	14	14	13
High	P02545	Prelamin-A/C OS=Homo sapiens OX=9606 GN=LMNA PE=1 SV=1	675	46	45	74.1	69	664	7.02	132	130	144	37	43	40	43	44	45	28	31	34
High	P68371	Tubulin beta-4B chain OS=Homo sapiens OX=9606 GN=TUBB4B PE=1 SV=1	674	25	1	49.8	73	445	4.89	101	98	88	43	52	43	23	25	24	14	14	13
High	Q562R1	Beta-actin-like protein 2 OS=Homo sapiens OX=9606 GN=ACTBL2 PE=1 SV=2	656	12	5	42	36	376	5.59	50	52	83	64	50	62	8	6	8	4	5	5
High	P52732	Kinesin-like protein KIF11 OS=Homo sapiens OX=9606 GN=KIF11 PE=1 SV=2	638	60	60	119.1	53	1056	5.64	69	61	64	70	91	76	49	43	44	44	46	45
High	Q00610	Clathrin heavy chain 1 OS=Homo sapiens OX=9606 GN=CLTC PE=1 SV=5	631	72	72	191.5	52	1675	5.69	81	85	72	36	38	33	66	67	52	31	34	29
High	P04350	Tubulin beta-4A chain OS=Homo sapiens OX=9606 GN=TUBB4A PE=1 SV=2	607	21	1	49.6	62	444	4.88	91	88	80	39	44	38	19	20	20	11	10	11
High	P49327	Fatty acid synthase OS=Homo sapiens OX=9606 GN=FASN PE=1 SV=3	603	85	84	273.3	45	2511	6.44	71	78	71	39	48	48	61	65	61	37	44	44
High	Q9BTC0	Death-inducer obliterator 1 OS=Homo sapiens OX=9606 GN=DIDO1 PE=1 SV=5	600	75	74	243.7	48	2240	7.88		1		77	99	85		1		48	57	56
High	O75369	Filamin-B OS=Homo sapiens OX=9606 GN=FLNB PE=1 SV=2	591	100	94	278	53	2602	5.73	62	73	74	47	49	49	58	66	69	43	46	48
High	Q14974	Importin subunit beta-1 OS=Homo sapiens OX=9606 GN=KPNB1 PE=1 SV=2	584	31	31	97.1	44	876	4.78	13	14	14	8	11	9	12	13	12	8	11	9
High	P11142	Heat shock cognate 71 kDa protein OS=Homo sapiens OX=9606 GN=HSPA8 PE=1 SV=1	571	35	23	70.9	69	646	5.52	50	47	55	63	77	58	29	26	30	22	27	22
High	P15924	Desmoplakin OS=Homo sapiens OX=9606 GN=DSP PE=1 SV=3	543	103	103	331.6	40	2871	6.81	76	75	71	45	46	43	70	69	64	44	45	42
High	Q92614	Unconventional myosin-XVIIIa OS=Homo sapiens OX=9606 GN=MYO18A PE=1 SV=3	537	87	87	233	49	2054	6.3	72	79	73	22	23	22	63	69	62	20	22	20
High	O14950	Myosin regulatory light chain 12B OS=Homo sapiens OX=9606 GN=MYL12B PE=1 SV=2	532	12	12	19.8	63	172	4.84	76	74	74	15	25	16	12	11	11	7	8	7
High	Q13885	Tubulin beta-2A chain OS=Homo sapiens OX=9606 GN=TUBB2A PE=1 SV=1	524	22	4	49.9	67	445	4.89	76	74	71	36	46	38	18	18	18	10	11	9
High	O14715	RANBP2-like and GRIP domain-containing protein 8 OS=Homo sapiens OX=9606 GN=RGPD8 PE=1 SV=2	494	66	2	198.9	41	1765	6.49	2	2	4	9	12	8	2	2	4	9	11	8
High	P38646	Stress-70 protein, mitochondrial OS=Homo sapiens OX=9606 GN=HSPA9 PE=1 SV=2	490	35	35	73.6	58	679	6.16	48	53	56	39	54	41	27	28	31	24	26	25
High	Q99666	RANBP2-like and GRIP domain-containing protein 5/6 OS=Homo sapiens OX=9606 GN=RGPD5 PE=1 SV=3	489	64	2	198.8	38	1765	6.42	2	2	4	9	12	8	2	2	4	9	11	8
High	P21333	Filamin-A OS=Homo sapiens OX=9606 GN=FLNA PE=1 SV=4	474	75	69	280.6	45	2647	6.06	58	46	44	48	49	40	39	35	41	37	39	31
High	P0DJD0	RANBP2-like and GRIP domain-containing protein 1 OS=Homo sapiens OX=9606 GN=RGPD1 PE=2 SV=1	470	45	2	196.5	30	1748	6.14			3	8	11	9			3	8	10	9
High	P07355	Annexin A2 OS=Homo sapiens OX=9606 GN=ANXA2 PE=1 SV=2	465	27	27	38.6	67	339	7.75	44	42	49	40	45	40	24	22	22	18	18	20
High	Q06830	Peroxiredoxin-1 OS=Homo sapiens OX=9606 GN=PRDX1 PE=1 SV=1	450	17	14	22.1	74	199	8.13	42	47	46	46	53	49	16	16	15	13	14	14
High	P98088	Mucin-5AC OS=Homo sapiens OX=9606 GN=MUC5AC PE=1 SV=4	443	91	88	585.2	34	5654	7.02	16	19	11	92	104	96	15	17	11	69	79	69
High	Q14204	Cytoplasmic dynein 1 heavy chain 1 OS=Homo sapiens OX=9606 GN=DYNC1H1 PE=1 SV=5	436	104	104	532.1	27	4646	6.4	49	51	53	18	27	24	49	49	50	18	27	24
High	Q9UM54	Unconventional myosin-VI OS=Homo sapiens OX=9606 GN=MYO6 PE=1 SV=4	431	66	66	149.6	53	1294	8.53	56	61	53	19	21	18	45	48	43	18	21	17
High	Q71U36	Tubulin alpha-1A chain OS=Homo sapiens OX=9606 GN=TUBA1A PE=1 SV=1	430	24	2	50.1	61	451	5.06	55	57	52	22	28	22	22	22	22	13	15	13
High	P04264	Keratin, type II cytoskeletal 1 OS=Homo sapiens OX=9606 GN=KRT1 PE=1 SV=6	418	34	27	66	57	644	8.12	52	42	62	45	45	40	29	26	31	27	24	24
High	Q6N021	Methylcytosine dioxygenase TET2 OS=Homo sapiens OX=9606 GN=TET2 PE=1 SV=3	406	71	68	223.7	46	2002	7.99				67	80	63				49	56	48
High	O15047	Histone-lysine N-methyltransferase SETD1A OS=Homo sapiens OX=9606 GN=SETD1A PE=1 SV=3	405	43	43	185.9	30	1707	5.14				54	70	56				33	37	36
High	P68104	Elongation factor 1-alpha 1 OS=Homo sapiens OX=9606 GN=EEF1A1 PE=1 SV=1	403	18	9	50.1	63	462	9.01	90	84	49	16	29	14	16	17	14	10	12	8
High	Q13509	Tubulin beta-3 chain OS=Homo sapiens OX=9606 GN=TUBB3 PE=1 SV=2	394	17	2	50.4	43	450	4.93	56	50	50	30	32	32	14	15	12	11	10	11
High	P58107	Epiplakin OS=Homo sapiens OX=9606 GN=EPPK1 PE=1 SV=3	386	90	83	555.3	48	5088	5.62	81	75	70	17	23	21	70	62	60	17	18	20
High	Q9BQE3	Tubulin alpha-1C chain OS=Homo sapiens OX=9606 GN=TUBA1C PE=1 SV=1	385	24	3	49.9	63	449	5.1	51	54	48	22	29	22	22	23	22	13	16	13
High	P00761 SWISS-PROT:P00761	Trypsin - Sus scrofa (Pig).	381	7	7	24.4	38	231	7.18	30	35	38	37	51	44	5	4	4	3	4	4
High	P19338	Nucleolin OS=Homo sapiens OX=9606 GN=NCL PE=1 SV=3	366	26	26	76.6	38	710	4.7	27	27	27	32	50	28	19	16	17	17	20	16
High	P68366	Tubulin alpha-4A chain OS=Homo sapiens OX=9606 GN=TUBA4A PE=1 SV=1	351	23	6	49.9	59	448	5.06	55	56	44	18	20	17	20	21	20	12	14	11
High	Q9ULV0	Unconventional myosin-Vb OS=Homo sapiens OX=9606 GN=MYO5B PE=1 SV=3	338	68	64	213.5	44	1848	7.2	60	58	53	8	13	11	50	52	47	8	13	11
High	P14618	Pyruvate kinase PKM OS=Homo sapiens OX=9606 GN=PKM PE=1 SV=4	335	27	27	57.9	63	531	7.84	40	42	43	20	28	21	24	23	22	14	18	14
High	P20700	Lamin-B1 OS=Homo sapiens OX=9606 GN=LMNB1 PE=1 SV=2	334	36	33	66.4	63	586	5.16	52	56	63	17	25	20	32	34	33	14	18	18
High	P35900	SWISS-PROT:P35900 Tax_Id=9606 Gene_Symbol=KRT20 Keratin, type I cytoskeletal 20	332	30	27	48.5	69	424	5.69	69	77	63	17	20	16	29	29	28	13	13	14
High	P0DMV9	Heat shock 70 kDa protein 1B OS=Homo sapiens OX=9606 GN=HSPA1B PE=1 SV=1	321	27	23	70	54	641	5.66	33	32	34	24	30	25	20	20	22	16	17	17
High	P35908	Keratin, type II cytoskeletal 2 epidermal OS=Homo sapiens OX=9606 GN=KRT2 PE=1 SV=2	319	41	1	65.4	65	639	8	43	39	91	20	26	24	29	23	40	16	18	17
High	P35908	SWISS-PROT:P35908 Tax_Id=9606 Gene_Symbol=KRT2 Keratin, type II cytoskeletal 2 epidermal	319	41	1	65.8	66	645	8	43	39	91	20	26	24	29	23	40	16	18	17
High	P13010	X-ray repair cross-complementing protein 5 OS=Homo sapiens OX=9606 GN=XRCC5 PE=1 SV=3	302	37	37	82.7	63	732	5.81	51	47	52	14	19	17	34	29	28	11	15	12
High	Q86V48	Leucine zipper protein 1 OS=Homo sapiens OX=9606 GN=LUZP1 PE=1 SV=2	302	47	47	120.2	50	1076	8.5	42	43	48	13	14	15	34	38	38	13	14	15
High	O43707	Alpha-actinin-4 OS=Homo sapiens OX=9606 GN=ACTN4 PE=1 SV=2	287	42	29	104.8	59	911	5.44	45	47	49	11	14	13	32	31	33	10	12	11
High	P13639	Elongation factor 2 OS=Homo sapiens OX=9606 GN=EEF2 PE=1 SV=4	285	40	39	95.3	56	858	6.83	41	35	32	18	33	18	29	24	27	16	20	16
High	Q7Z6Z7	E3 ubiquitin-protein ligase HUWE1 OS=Homo sapiens OX=9606 GN=HUWE1 PE=1 SV=3	280	73	73	481.6	23	4374	5.22	13	12	11	55	63	56	12	11	10	49	54	51
High	P11021	Endoplasmic reticulum chaperone BiP OS=Homo sapiens OX=9606 GN=HSPA5 PE=1 SV=2	278	28	26	72.3	49	654	5.16	25	25	27	26	37	27	19	19	21	20	23	22
High	Q8TDZ2	[F-actin]-monooxygenase MICAL1 OS=Homo sapiens OX=9606 GN=MICAL1 PE=1 SV=2	273	44	44	117.8	52	1067	6.4	68	68	80	6	8	6	37	40	38	5	7	5
High	A2NJV5	Immunoglobulin kappa variable 2-29 OS=Homo sapiens OX=9606 GN=IGKV2-29 PE=3 SV=2	272	3	2	13.1	17	120	7.28	20	23	18	34	51	48	2	2	2	2	2	2
High	P49411	Elongation factor Tu, mitochondrial OS=Homo sapiens OX=9606 GN=TUFM PE=1 SV=2	267	26	26	49.5	59	452	7.61	38	37	41	15	19	20	26	26	23	14	16	17
High	P35527	SWISS-PROT:P35527 Tax_Id=9606 Gene_Symbol=KRT9 Keratin, type I cytoskeletal 9	264	26	25	62.1	57	623	5.3	41	33	38	22	22	24	22	18	22	15	14	16
High	P13645	SWISS-PROT:P13645 Tax_Id=9606 Gene_Symbol=KRT10 Keratin, type I cytoskeletal 10	263	27	23	59.5	50	593	5.21	38	38	64	18	28	22	24	18	25	14	18	17
High	P19474	E3 ubiquitin-protein ligase TRIM21 OS=Homo sapiens OX=9606 GN=TRIM21 PE=1 SV=1	262	26	26	54.1	52	475	6.38	32	30	30	28	32	24	23	22	21	15	17	16
High	P46060	Ran GTPase-activating protein 1 OS=Homo sapiens OX=9606 GN=RANGAP1 PE=1 SV=1	260	29	29	63.5	53	587	4.68	1	1	1	5	6	5	1	1	1	5	6	5
High	P12956	X-ray repair cross-complementing protein 6 OS=Homo sapiens OX=9606 GN=XRCC6 PE=1 SV=2	260	31	31	69.8	52	609	6.64	47	42	37	15	21	19	28	28	28	12	15	15
High	O94832	Unconventional myosin-Id OS=Homo sapiens OX=9606 GN=MYO1D PE=1 SV=2	259	43	43	116.1	45	1006	9.39	29	33	29	13	17	11	28	30	26	13	16	11
High	P27708	CAD protein OS=Homo sapiens OX=9606 GN=CAD PE=1 SV=3	258	54	54	242.8	33	2225	6.46	38	36	40	13	23	20	36	35	34	12	20	20
High	Q9P2E9	Ribosome-binding protein 1 OS=Homo sapiens OX=9606 GN=RRBP1 PE=1 SV=5	258	43	43	152.4	41	1410	8.6	17	19	23	27	30	27	17	18	23	26	28	27
High	Q9NYL9	Tropomodulin-3 OS=Homo sapiens OX=9606 GN=TMOD3 PE=1 SV=1	257	22	22	39.6	62	352	5.19	38	34	34	10	16	12	22	21	21	10	14	11
High	P15822	Zinc finger protein 40 OS=Homo sapiens OX=9606 GN=HIVEP1 PE=1 SV=4	253	62	60	296.7	31	2718	7.84				48	61	48				43	50	44
High	Q05639	Elongation factor 1-alpha 2 OS=Homo sapiens OX=9606 GN=EEF1A2 PE=1 SV=1	251	14	5	50.4	50	463	9.03	71	70	29	12	19	12	12	13	10	6	7	6
High	P10809	60 kDa heat shock protein, mitochondrial OS=Homo sapiens OX=9606 GN=HSPD1 PE=1 SV=2	251	28	28	61	63	573	5.87	31	30	24	17	19	17	18	19	19	14	17	15
High	P05784	SWISS-PROT:P05784 Tax_Id=10090 Gene_Symbol=Krt18 Keratin, type I cytoskeletal 18	248	12	1	47.5	24	423	5.33	49	55	52	14	17	16	11	11	9	7	7	7
High	Q14980	Nuclear mitotic apparatus protein 1 OS=Homo sapiens OX=9606 GN=NUMA1 PE=1 SV=2	248	53	53	238.1	32	2115	5.78	28	30	36	20	21	20	25	28	31	19	21	19
High	Q9UHB6	LIM domain and actin-binding protein 1 OS=Homo sapiens OX=9606 GN=LIMA1 PE=1 SV=1	247	36	36	85.2	58	759	6.84	28	33	33	10	11	10	24	26	24	10	11	10
High	P14649	Myosin light chain 6B OS=Homo sapiens OX=9606 GN=MYL6B PE=1 SV=1	243	12	10	22.8	54	208	5.73	24	29	26	25	22	22	9	10	8	7	8	7
High	P02538	SWISS-PROT:P02538 Tax_Id=9606 Gene_Symbol=KRT6A Keratin, type II cytoskeletal 6A	242	20	5	60	29	564	8	38	40	57	15	15	17	12	10	14	9	8	9
High	REFSEQ:XP_092267	Tax_Id=9606 Gene_Symbol=LOC150739 similar to Keratin, type II cytoskeletal 8	241	4	1	23.1	22	213	7.59	57	57	73	11	8	8	3	3	4	2	2	2
High	P09493	Tropomyosin alpha-1 chain OS=Homo sapiens OX=9606 GN=TPM1 PE=1 SV=2	240	24	10	32.7	52	284	4.74	28	25	32	23	30	23	15	13	17	15	21	14
High	O43151	Methylcytosine dioxygenase TET3 OS=Homo sapiens OX=9606 GN=TET3 PE=1 SV=4	234	54	51	193.6	40	1795	7.81				44	53	47				35	41	38
High	Q14160	Protein scribble homolog OS=Homo sapiens OX=9606 GN=SCRIB PE=1 SV=5	232	49	47	174.8	40	1630	5.07	31	32	35	8	8	9	31	32	34	8	8	9
High	Q9UPQ0	LIM and calponin homology domains-containing protein 1 OS=Homo sapiens OX=9606 GN=LIMCH1 PE=1 SV=4	232	40	40	121.8	46	1083	6.47	38	36	40	9	10	9	30	28	32	9	10	9
High	P08238	Heat shock protein HSP 90-beta OS=Homo sapiens OX=9606 GN=HSP90AB1 PE=1 SV=4	230	30	17	83.2	51	724	5.03	20	27	33	24	21	20	18	18	24	17	18	15
High	P08730-1	SWISS-PROT:P08730-1 Tax_Id=10090 Gene_Symbol=Krt13 Isoform 1 of Keratin, type I cytoskeletal 13	230	9	1	47.7	19	437	4.86	56	56	53	9	14	10	9	9	9	5	6	5
High	P00352	Aldehyde dehydrogenase 1A1 OS=Homo sapiens OX=9606 GN=ALDH1A1 PE=1 SV=2	229	25	22	54.8	56	501	6.73	23	23	29	9	16	9	17	18	18	9	14	9
High	Q3SX28	TREMBL:Q3SX28;Q5KR48 (Bos taurus) Tropomyosin 2	229	21	5	33	46	284	4.69	29	26	30	18	25	17	16	15	16	13	17	12
High	P61978	Heterogeneous nuclear ribonucleoprotein K OS=Homo sapiens OX=9606 GN=HNRNPK PE=1 SV=1	229	19	19	50.9	53	463	5.54	21	24	23	20	25	19	12	14	15	13	14	13
High	Q08211	ATP-dependent RNA helicase A OS=Homo sapiens OX=9606 GN=DHX9 PE=1 SV=4	228	37	37	140.9	36	1270	6.84	24	26	26	20	19	20	22	24	24	18	18	18
High	P22102	Trifunctional purine biosynthetic protein adenosine-3 OS=Homo sapiens OX=9606 GN=GART PE=1 SV=1	226	36	36	107.7	46	1010	6.7	23	25	29	17	18	16	20	21	22	15	14	16
High	P07384	Calpain-1 catalytic subunit OS=Homo sapiens OX=9606 GN=CAPN1 PE=1 SV=1	226	32	32	81.8	45	714	5.67	31	36	37	12	14	11	25	28	24	12	14	11
High	Q92598	Heat shock protein 105 kDa OS=Homo sapiens OX=9606 GN=HSPH1 PE=1 SV=1	225	36	33	96.8	50	858	5.39	20	21	23	16	23	14	18	20	23	15	19	13
High	P63010	AP-2 complex subunit beta OS=Homo sapiens OX=9606 GN=AP2B1 PE=1 SV=1	224	38	23	104.5	47	937	5.38	24	32	31	10	9	14	23	30	26	10	7	13
High	Q13045	Protein flightless-1 homolog OS=Homo sapiens OX=9606 GN=FLII PE=1 SV=2	223	38	38	144.7	38	1269	6.05	34	34	34	7	12	5	26	27	26	6	11	5
High	P23396	40S ribosomal protein S3 OS=Homo sapiens OX=9606 GN=RPS3 PE=1 SV=2	223	19	19	26.7	79	243	9.66	28	29	30	13	19	18	17	16	16	12	11	15
High	P23528	Cofilin-1 OS=Homo sapiens OX=9606 GN=CFL1 PE=1 SV=3	222	14	14	18.5	67	166	8.09	34	32	27	11	17	13	12	12	13	7	9	7
High	P07814	Bifunctional glutamate/proline--tRNA ligase OS=Homo sapiens OX=9606 GN=EPRS1 PE=1 SV=5	219	43	43	170.5	38	1512	7.33	14	19	24	13	19	16	14	18	22	13	18	16
High	P02533	Keratin, type I cytoskeletal 14 OS=Homo sapiens OX=9606 GN=KRT14 PE=1 SV=4	218	19	2	51.5	36	472	5.16	37	40	48	11	17	15	13	12	15	7	9	10
High	O00159	Unconventional myosin-Ic OS=Homo sapiens OX=9606 GN=MYO1C PE=1 SV=4	216	40	40	121.6	43	1063	9.41	32	29	31	15	10	12	30	26	28	15	10	12
High	Q2KHR3	Glutamine and serine-rich protein 1 OS=Homo sapiens OX=9606 GN=QSER1 PE=1 SV=3	214	41	41	189.9	34	1735	7.08				29	46	32				26	33	25
High	O75688	Protein phosphatase 1B OS=Homo sapiens OX=9606 GN=PPM1B PE=1 SV=1	214	19	16	52.6	48	479	5.05	24	29	18	14	30	14	16	18	13	9	14	10
High	Q13085	Acetyl-CoA carboxylase 1 OS=Homo sapiens OX=9606 GN=ACACA PE=1 SV=2	213	57	50	265.4	32	2346	6.37	28	28	32	14	10	14	27	28	31	14	10	14
High	O95782	AP-2 complex subunit alpha-1 OS=Homo sapiens OX=9606 GN=AP2A1 PE=1 SV=3	211	37	27	107.5	43	977	7.03	25	28	20	16	15	11	24	28	19	14	15	11
High	P16615	Sarcoplasmic/endoplasmic reticulum calcium ATPase 2 OS=Homo sapiens OX=9606 GN=ATP2A2 PE=1 SV=1	211	34	29	114.7	36	1042	5.34	28	29	34	13	15	16	25	25	27	12	13	14
High	P00390	Glutathione reductase, mitochondrial OS=Homo sapiens OX=9606 GN=GSR PE=1 SV=2	209	19	19	56.2	61	522	8.5	22	26	22	14	17	11	16	16	14	10	13	9
High	Q9P0U4	CXXC-type zinc finger protein 1 OS=Homo sapiens OX=9606 GN=CXXC1 PE=1 SV=2	206	29	29	75.7	46	656	8.24				31	36	23				22	24	19
High	P62937	Peptidyl-prolyl cis-trans isomerase A OS=Homo sapiens OX=9606 GN=PPIA PE=1 SV=2	205	9	9	18	53	165	7.81	23	18	24	17	29	19	9	8	8	4	5	5
High	Q9BUF5	Tubulin beta-6 chain OS=Homo sapiens OX=9606 GN=TUBB6 PE=1 SV=1	204	10	2	49.8	29	446	4.88	31	25	26	17	18	18	8	8	7	6	5	5
High	P13647	SWISS-PROT:P13647 Tax_Id=9606 Gene_Symbol=KRT5 Keratin, type II cytoskeletal 5	204	26	13	62.3	38	590	7.74	25	25	54	14	14	17	14	8	20	10	9	11
High	Q9NR30	Nucleolar RNA helicase 2 OS=Homo sapiens OX=9606 GN=DDX21 PE=1 SV=5	202	30	28	87.3	39	783	9.28	11	12	13	23	24	20	11	12	12	21	18	17
High	P13646-1	SWISS-PROT:P13646-1 Tax_Id=9606 Gene_Symbol=KRT13 Isoform 1 of Keratin, type I cytoskeletal 13	198	16	8	49.6	34	458	4.96	49	48	47	6	12	5	13	14	12	5	6	4
High	P62805	Histone H4 OS=Homo sapiens OX=9606 GN=H4C1 PE=1 SV=2	198	7	7	11.4	52	103	11.36	20	19	28	24	22	23	5	6	7	6	6	6
High	Q92841	Probable ATP-dependent RNA helicase DDX17 OS=Homo sapiens OX=9606 GN=DDX17 PE=1 SV=2	198	29	21	80.2	47	729	8.27	20	18	19	20	21	19	19	17	18	18	18	17
High	Q04695	SWISS-PROT:Q04695 Tax_Id=9606 Gene_Symbol=KRT17 Keratin, type I cytoskeletal 17	198	18	6	48.1	33	432	5.02	38	42	41	11	20	13	15	16	15	7	12	8
High	Q76L83	Putative Polycomb group protein ASXL2 OS=Homo sapiens OX=9606 GN=ASXL2 PE=1 SV=1	196	41	40	153.7	40	1435	8.81				31	32	30				31	30	30
High	P17844	Probable ATP-dependent RNA helicase DDX5 OS=Homo sapiens OX=9606 GN=DDX5 PE=1 SV=1	196	28	20	69.1	44	614	8.92	23	22	22	18	21	19	21	19	20	16	19	16
High	P06733	Alpha-enolase OS=Homo sapiens OX=9606 GN=ENO1 PE=1 SV=2	195	20	20	47.1	57	434	7.39	18	18	24	19	27	19	13	15	16	12	15	12
High	P22626	Heterogeneous nuclear ribonucleoproteins A2/B1 OS=Homo sapiens OX=9606 GN=HNRNPA2B1 PE=1 SV=2	194	18	16	37.4	56	353	8.95	31	39	31	14	14	14	15	17	14	10	12	11
High	P62424	60S ribosomal protein L7a OS=Homo sapiens OX=9606 GN=RPL7A PE=1 SV=2	193	14	14	30	42	266	10.61	14	14	16	17	15	18	10	12	12	11	12	12
High	Q15233	Non-POU domain-containing octamer-binding protein OS=Homo sapiens OX=9606 GN=NONO PE=1 SV=4	193	18	17	54.2	49	471	8.95	17	19	23	19	28	22	13	14	16	15	16	12
High	Q13126	S-methyl-5'-thioadenosine phosphorylase OS=Homo sapiens OX=9606 GN=MTAP PE=1 SV=2	191	16	16	31.2	73	283	7.18	19	18	22	15	20	14	14	14	14	11	12	12
High	Q6P3W7	SCY1-like protein 2 OS=Homo sapiens OX=9606 GN=SCYL2 PE=1 SV=1	191	26	26	103.6	38	929	8.22	19	19	21	13	13	17	18	15	17	12	12	16
High	Q00839	Heterogeneous nuclear ribonucleoprotein U OS=Homo sapiens OX=9606 GN=HNRNPU PE=1 SV=6	191	26	26	90.5	37	825	6	22	25	33	18	17	18	18	19	21	15	15	14
High	O15027	Protein transport protein Sec16A OS=Homo sapiens OX=9606 GN=SEC16A PE=1 SV=4	190	45	45	251.7	31	2357	5.8	20	22	23	11	11	13	18	21	22	11	11	13
High	P08779	SWISS-PROT:P08779 Tax_Id=9606 Gene_Symbol=KRT16 Keratin, type I cytoskeletal 16	188	15	3	51.2	30	473	5.05	30	34	39	11	16	12	9	8	10	7	8	7
High	P52272	Heterogeneous nuclear ribonucleoprotein M OS=Homo sapiens OX=9606 GN=HNRNPM PE=1 SV=3	184	31	31	77.5	48	730	8.7	21	20	18	17	13	17	21	20	17	16	13	15
High	P67936	Tropomyosin alpha-4 chain OS=Homo sapiens OX=9606 GN=TPM4 PE=1 SV=3	183	20	8	28.5	58	248	4.69	24	23	27	14	22	12	12	12	15	11	14	9
High	Q14764	Major vault protein OS=Homo sapiens OX=9606 GN=MVP PE=1 SV=4	180	30	30	99.3	43	893	5.48	13	15	15	17	20	17	13	14	15	16	18	15
High	P09327	Villin-1 OS=Homo sapiens OX=9606 GN=VIL1 PE=1 SV=4	180	29	29	92.6	43	827	6.39	23	26	24	13	17	11	20	22	21	13	14	11
High	P62979	Ubiquitin-40S ribosomal protein S27a OS=Homo sapiens OX=9606 GN=RPS27A PE=1 SV=2	180	7	7	18	51	156	9.64	18	16	22	20	23	19	7	7	7	6	7	7
High	P51659	Peroxisomal multifunctional enzyme type 2 OS=Homo sapiens OX=9606 GN=HSD17B4 PE=1 SV=3	180	24	24	79.6	47	736	8.84	21	24	26	11	13	12	18	19	20	11	12	11
High	Q15291	Retinoblastoma-binding protein 5 OS=Homo sapiens OX=9606 GN=RBBP5 PE=1 SV=2	180	23	23	59.1	51	538	5.1			1	24	25	23			1	16	17	16
High	P07900	Heat shock protein HSP 90-alpha OS=Homo sapiens OX=9606 GN=HSP90AA1 PE=1 SV=5	177	26	14	84.6	44	732	5.02	18	21	21	19	20	18	17	16	16	15	17	14
High	P14625	Endoplasmin OS=Homo sapiens OX=9606 GN=HSP90B1 PE=1 SV=1	176	28	27	92.4	39	803	4.84	22	25	24	13	22	7	17	15	23	13	16	7
High	P46940	Ras GTPase-activating-like protein IQGAP1 OS=Homo sapiens OX=9606 GN=IQGAP1 PE=1 SV=1	176	43	41	189.1	33	1657	6.48	22	21	26	5	11	10	22	19	24	5	10	10
High	Q12906	Interleukin enhancer-binding factor 3 OS=Homo sapiens OX=9606 GN=ILF3 PE=1 SV=3	175	22	20	95.3	32	894	8.76	15	17	16	18	21	17	13	15	14	14	16	14
High	P47756	F-actin-capping protein subunit beta OS=Homo sapiens OX=9606 GN=CAPZB PE=1 SV=4	175	13	13	31.3	43	277	5.59	16	18	23	15	18	12	9	10	12	9	8	7
High	P0CG39	POTE ankyrin domain family member J OS=Homo sapiens OX=9606 GN=POTEJ PE=3 SV=1	174	6	3	117.3	8	1038	5.97	32	32	17	8	23	9	5	4	4	3	3	3
High	P22314	Ubiquitin-like modifier-activating enzyme 1 OS=Homo sapiens OX=9606 GN=UBA1 PE=1 SV=3	174	31	31	117.8	37	1058	5.76	16	14	21	16	18	16	13	13	18	15	16	15
High	P11940	Polyadenylate-binding protein 1 OS=Homo sapiens OX=9606 GN=PABPC1 PE=1 SV=2	174	22	16	70.6	44	636	9.5	16	17	16	16	20	18	14	14	15	14	17	15
High	Q8IZD2	Inactive histone-lysine N-methyltransferase 2E OS=Homo sapiens OX=9606 GN=KMT2E PE=1 SV=1	173	39	38	204.8	28	1858	7.61				25	29	27				22	26	23
High	P53621	Coatomer subunit alpha OS=Homo sapiens OX=9606 GN=COPA PE=1 SV=2	173	36	36	138.3	35	1224	7.66	21	21	20	9	7	10	21	20	20	9	7	10
High	P41250	Glycine--tRNA ligase OS=Homo sapiens OX=9606 GN=GARS1 PE=1 SV=3	171	27	27	83.1	45	739	7.03	29	28	28	11	13	11	21	19	23	11	12	10
High	P25205	DNA replication licensing factor MCM3 OS=Homo sapiens OX=9606 GN=MCM3 PE=1 SV=3	170	30	30	90.9	46	808	5.77	15	12	14	20	22	19	14	11	13	16	19	16
High	P23246	Splicing factor, proline- and glutamine-rich OS=Homo sapiens OX=9606 GN=SFPQ PE=1 SV=2	170	22	21	76.1	31	707	9.44	29	31	30	7	14	6	19	21	20	5	9	6
High	P63244	Receptor of activated protein C kinase 1 OS=Homo sapiens OX=9606 GN=RACK1 PE=1 SV=3	170	19	19	35.1	84	317	7.69	21	22	21	18	16	17	15	17	16	13	11	13
High	Q9Y230	RuvB-like 2 OS=Homo sapiens OX=9606 GN=RUVBL2 PE=1 SV=3	168	19	19	51.1	46	463	5.64	19	20	21	17	15	15	16	17	18	16	14	14
High	O43143	ATP-dependent RNA helicase DHX15 OS=Homo sapiens OX=9606 GN=DHX15 PE=1 SV=2	168	22	21	90.9	30	795	7.46	13	10	15	18	19	20	12	10	13	14	14	16
High	P32119	Peroxiredoxin-2 OS=Homo sapiens OX=9606 GN=PRDX2 PE=1 SV=5	168	11	10	21.9	58	198	5.97	21	21	22	12	15	13	11	11	10	7	8	6
High	Q9UBL3	Set1/Ash2 histone methyltransferase complex subunit ASH2 OS=Homo sapiens OX=9606 GN=ASH2L PE=1 SV=1	167	22	22	68.7	42	628	5.69		1		19	21	17		1		16	16	15
High	P11413	Glucose-6-phosphate 1-dehydrogenase OS=Homo sapiens OX=9606 GN=G6PD PE=1 SV=4	166	25	25	59.2	55	515	6.84	21	15	19	14	14	16	20	15	15	13	13	15
High	P06753	Tropomyosin alpha-3 chain OS=Homo sapiens OX=9606 GN=TPM3 PE=1 SV=2	166	16	5	32.9	37	285	4.72	19	18	21	17	20	17	9	8	10	10	11	9
High	Q9UDY2	Tight junction protein ZO-2 OS=Homo sapiens OX=9606 GN=TJP2 PE=1 SV=2	165	32	32	133.9	37	1190	7.4	14	16	18	10	16	11	14	16	17	10	15	11
High	P54652	Heat shock-related 70 kDa protein 2 OS=Homo sapiens OX=9606 GN=HSPA2 PE=1 SV=1	164	12	1	70	18	639	5.74	14	13	16	18	26	15	9	8	10	8	10	7
High	Q9C0C2	182 kDa tankyrase-1-binding protein OS=Homo sapiens OX=9606 GN=TNKS1BP1 PE=1 SV=4	164	37	37	181.7	33	1729	4.86	10	11	13	15	13	13	10	11	13	15	13	13
High	P06396	Gelsolin OS=Homo sapiens OX=9606 GN=GSN PE=1 SV=1	162	23	10	85.6	39	782	6.28	19	21	25	4	12	8	15	16	18	4	9	8
High	P14923	Junction plakoglobin OS=Homo sapiens OX=9606 GN=JUP PE=1 SV=3	162	23	19	81.7	36	745	6.14	21	15	21	9	16	9	16	14	17	9	15	9
High	Q9P258	Protein RCC2 OS=Homo sapiens OX=9606 GN=RCC2 PE=1 SV=2	162	17	17	56	37	522	8.78	16	15	18	16	17	16	13	13	12	11	12	13
High	P11216	Glycogen phosphorylase, brain form OS=Homo sapiens OX=9606 GN=PYGB PE=1 SV=5	161	32	32	96.6	42	843	6.86	29	29	25	8	8	9	27	28	23	8	8	9
High	O95678	SWISS-PROT:O95678 Tax_Id=9606 Gene_Symbol=KRT75 Keratin, type II cytoskeletal 75	161	10	1	59.5	13	551	7.74	22	28	45	9	11	10	7	7	10	4	4	4
High	P17987	T-complex protein 1 subunit alpha OS=Homo sapiens OX=9606 GN=TCP1 PE=1 SV=1	161	23	23	60.3	51	556	6.11	22	22	25	11	11	10	20	19	22	11	11	10
High	P23526	Adenosylhomocysteinase OS=Homo sapiens OX=9606 GN=AHCY PE=1 SV=4	161	20	19	47.7	49	432	6.34	22	26	13	16	11	15	16	18	11	14	10	13
High	P05023	Sodium/potassium-transporting ATPase subunit alpha-1 OS=Homo sapiens OX=9606 GN=ATP1A1 PE=1 SV=1	160	28	28	112.8	33	1023	5.49	17	18	18	13	15	14	16	18	15	11	13	13
High	Q7Z3B3	KAT8 regulatory NSL complex subunit 1 OS=Homo sapiens OX=9606 GN=KANSL1 PE=1 SV=2	158	31	31	121	42	1105	8.81				23	28	23				19	23	19
High	P14868	Aspartate--tRNA ligase, cytoplasmic OS=Homo sapiens OX=9606 GN=DARS1 PE=1 SV=2	158	27	27	57.1	60	501	6.55	16	14	18	16	15	13	16	13	17	16	15	13
High	P11387	DNA topoisomerase 1 OS=Homo sapiens OX=9606 GN=TOP1 PE=1 SV=2	158	25	25	90.7	32	765	9.31	13	14	14	16	18	16	13	13	13	15	16	14
High	Q01813	ATP-dependent 6-phosphofructokinase, platelet type OS=Homo sapiens OX=9606 GN=PFKP PE=1 SV=2	156	26	22	85.5	41	784	7.55	24	24	22	8	11	8	22	21	19	8	10	8
High	O00571	ATP-dependent RNA helicase DDX3X OS=Homo sapiens OX=9606 GN=DDX3X PE=1 SV=3	155	26	25	73.2	45	662	7.18	20	22	17	13	16	14	17	17	14	12	14	12
High	Q15365	Poly(rC)-binding protein 1 OS=Homo sapiens OX=9606 GN=PCBP1 PE=1 SV=2	154	13	9	37.5	61	356	7.09	13	13	15	17	17	17	11	11	10	9	9	9
High	P30740	Leukocyte elastase inhibitor OS=Homo sapiens OX=9606 GN=SERPINB1 PE=1 SV=1	154	19	18	42.7	53	379	6.28	16	15	19	15	14	12	16	15	14	11	7	11
High	P06748	Nucleophosmin OS=Homo sapiens OX=9606 GN=NPM1 PE=1 SV=2	153	11	11	32.6	52	294	4.78	17	13	15	5	14	7	8	7	7	3	7	5
High	P62701	40S ribosomal protein S4, X isoform OS=Homo sapiens OX=9606 GN=RPS4X PE=1 SV=2	152	16	16	29.6	51	263	10.15	17	15	15	15	17	16	13	12	13	10	13	9
High	O14639	Actin-binding LIM protein 1 OS=Homo sapiens OX=9606 GN=ABLIM1 PE=1 SV=3	152	25	25	87.6	38	778	8.59	21	25	23	8	9	6	18	18	17	8	7	6
High	Q03164	Histone-lysine N-methyltransferase 2A OS=Homo sapiens OX=9606 GN=KMT2A PE=1 SV=5	151	45	41	431.5	16	3969	9.09				22	30	24				22	27	24
High	Q5QNW6	Histone H2B type 2-F OS=Homo sapiens OX=9606 GN=H2BC18 PE=1 SV=3	150	5	2	13.9	36	126	10.32	22	17	26	12	11	11	4	4	5	5	5	5
High	Q14247	Src substrate cortactin OS=Homo sapiens OX=9606 GN=CTTN PE=1 SV=2	150	20	20	61.5	41	550	5.4	17	14	15	12	15	15	15	13	12	11	15	14
High	P09874	Poly [ADP-ribose] polymerase 1 OS=Homo sapiens OX=9606 GN=PARP1 PE=1 SV=4	147	29	29	113	35	1014	8.88	17	16	20	13	14	13	16	16	17	13	14	13
High	Q9UJ72	Annexin A10 OS=Homo sapiens OX=9606 GN=ANXA10 PE=1 SV=3	146	17	17	37.3	66	324	5.33	17	17	14	8	11	8	14	14	12	7	8	7
High	Q7L576	Cytoplasmic FMR1-interacting protein 1 OS=Homo sapiens OX=9606 GN=CYFIP1 PE=1 SV=1	146	29	29	145.1	27	1253	6.9	20	22	21	9	8	10	17	19	16	9	8	10
High	P52907	F-actin-capping protein subunit alpha-1 OS=Homo sapiens OX=9606 GN=CAPZA1 PE=1 SV=3	146	12	10	32.9	65	286	5.69	15	12	16	5	7	7	9	6	10	4	6	5
High	P85037	Forkhead box protein K1 OS=Homo sapiens OX=9606 GN=FOXK1 PE=1 SV=1	145	21	19	75.4	31	733	9.32	5	4	3	19	19	19	5	4	3	15	17	14
High	P55265	Double-stranded RNA-specific adenosine deaminase OS=Homo sapiens OX=9606 GN=ADAR PE=1 SV=4	145	29	29	136	29	1226	8.65	11	12	10	16	17	18	11	12	10	16	15	17
High	P41252	Isoleucine--tRNA ligase, cytoplasmic OS=Homo sapiens OX=9606 GN=IARS1 PE=1 SV=2	145	30	30	144.4	31	1262	6.15	17	14	17	9	7	9	17	14	16	9	7	9
High	P10599	Thioredoxin OS=Homo sapiens OX=9606 GN=TXN PE=1 SV=3	144	5	5	11.7	50	105	4.92	12	16	17	10	23	9	4	5	5	4	4	3
High	P37802	Transgelin-2 OS=Homo sapiens OX=9606 GN=TAGLN2 PE=1 SV=3	144	13	13	22.4	74	199	8.25	16	12	12	16	15	12	12	10	9	9	9	8
High	P56470	Galectin-4 OS=Homo sapiens OX=9606 GN=LGALS4 PE=1 SV=1	144	11	11	35.9	35	323	9.16	17	17	20	6	5	8	9	9	10	5	3	5
High	P49915	GMP synthase [glutamine-hydrolyzing] OS=Homo sapiens OX=9606 GN=GMPS PE=1 SV=1	143	26	26	76.7	48	693	6.87	20	18	17	11	12	8	17	16	14	10	10	8
High	P33992	DNA replication licensing factor MCM5 OS=Homo sapiens OX=9606 GN=MCM5 PE=1 SV=5	142	28	28	82.2	44	734	8.37	14	9	15	9	18	10	14	8	15	9	16	10
High	P06576	ATP synthase subunit beta, mitochondrial OS=Homo sapiens OX=9606 GN=ATP5F1B PE=1 SV=3	141	22	22	56.5	62	529	5.4	22	23	25	12	11	13	17	18	20	10	9	11
High	P63104	14-3-3 protein zeta/delta OS=Homo sapiens OX=9606 GN=YWHAZ PE=1 SV=1	140	14	11	27.7	62	245	4.79	15	15	16	7	15	12	11	11	10	7	9	7
High	Q16778	Histone H2B type 2-E OS=Homo sapiens OX=9606 GN=H2BC21 PE=1 SV=3	140	5	2	13.9	36	126	10.32	20	16	26	11	10	10	4	4	5	5	5	5
High	Q6IFX2	SWISS-PROT:Q6IFX2 Tax_Id=10090 Gene_Symbol=Krt42 Keratin, type I cytoskeletal 42	140	11	1	50.1	18	452	5.16	27	27	32	8	14	7	9	9	11	4	6	4
High	P53618	Coatomer subunit beta OS=Homo sapiens OX=9606 GN=COPB1 PE=1 SV=3	138	28	28	107.1	41	953	6.05	26	27	25	6	7	2	22	22	21	5	6	2
High	P61247	40S ribosomal protein S3a OS=Homo sapiens OX=9606 GN=RPS3A PE=1 SV=2	137	16	16	29.9	53	264	9.73	11	9	11	13	15	15	9	7	10	12	12	13
High	Q92560	Ubiquitin carboxyl-terminal hydrolase BAP1 OS=Homo sapiens OX=9606 GN=BAP1 PE=1 SV=2	137	25	25	80.3	48	729	6.84				15	23	17				13	15	13
High	P62258	14-3-3 protein epsilon OS=Homo sapiens OX=9606 GN=YWHAE PE=1 SV=1	137	16	13	29.2	59	255	4.74	14	16	18	10	12	13	12	12	12	10	10	11
High	O14974	Protein phosphatase 1 regulatory subunit 12A OS=Homo sapiens OX=9606 GN=PPP1R12A PE=1 SV=1	136	22	22	115.2	26	1030	5.4	14	11	19	12	11	11	12	10	16	10	11	11
High	P27348	14-3-3 protein theta OS=Homo sapiens OX=9606 GN=YWHAQ PE=1 SV=1	136	12	8	27.7	53	245	4.78	14	15	16	11	14	14	8	9	8	8	7	8
High	P39023	60S ribosomal protein L3 OS=Homo sapiens OX=9606 GN=RPL3 PE=1 SV=2	135	15	15	46.1	40	403	10.18	13	12	15	7	10	10	10	10	11	7	8	9
High	P12814	Alpha-actinin-1 OS=Homo sapiens OX=9606 GN=ACTN1 PE=1 SV=2	135	23	10	103	32	892	5.41	22	29	24	5	7	6	16	20	17	5	6	6
High	P04843	Dolichyl-diphosphooligosaccharide--protein glycosyltransferase subunit 1 OS=Homo sapiens OX=9606 GN=RPN1 PE=1 SV=1	135	25	25	68.5	52	607	6.38	17	22	21	8	9	8	17	21	18	8	8	8
High	Q92597	Protein NDRG1 OS=Homo sapiens OX=9606 GN=NDRG1 PE=1 SV=1	135	11	11	42.8	54	394	5.82	16	20	13	8	11	7	11	11	8	5	6	5
High	O94973	AP-2 complex subunit alpha-2 OS=Homo sapiens OX=9606 GN=AP2A2 PE=1 SV=2	134	28	18	103.9	40	939	6.96	16	17	16	5	7	5	15	16	16	5	7	5
High	P25705	ATP synthase subunit alpha, mitochondrial OS=Homo sapiens OX=9606 GN=ATP5F1A PE=1 SV=1	134	19	19	59.7	46	553	9.13	22	21	22	7	10	11	17	17	17	7	10	10
High	P05141	ADP/ATP translocase 2 OS=Homo sapiens OX=9606 GN=SLC25A5 PE=1 SV=7	133	16	6	32.8	51	298	9.69	16	15	15	6	11	8	12	13	10	6	10	6
High	P35080	Profilin-2 OS=Homo sapiens OX=9606 GN=PFN2 PE=1 SV=3	133	5	5	15	36	140	6.99	10	11	15	10	15	10	4	4	4	3	5	4
High	O95789	Zinc finger MYM-type protein 6 OS=Homo sapiens OX=9606 GN=ZMYM6 PE=1 SV=2	133	40	40	148	36	1325	8.22
High	P46013	Proliferation marker protein Ki-67 OS=Homo sapiens OX=9606 GN=MKI67 PE=1 SV=2	132	37	37	358.5	17	3256	9.45	8	8	14	12	13	14	8	8	13	12	13	14
High	O43390	Heterogeneous nuclear ribonucleoprotein R OS=Homo sapiens OX=9606 GN=HNRNPR PE=1 SV=1	131	21	15	70.9	39	633	8.13	13	14	18	8	12	12	13	14	16	8	12	12
High	P38159	RNA-binding motif protein, X chromosome OS=Homo sapiens OX=9606 GN=RBMX PE=1 SV=3	130	16	4	42.3	41	391	10.05	13	16	21	10	12	13	11	13	15	10	10	11
High	P34932	Heat shock 70 kDa protein 4 OS=Homo sapiens OX=9606 GN=HSPA4 PE=1 SV=4	130	26	25	94.3	44	840	5.19	10	13	18	8	7	7	10	12	18	7	7	7
High	P67809	Y-box-binding protein 1 OS=Homo sapiens OX=9606 GN=YBX1 PE=1 SV=3	130	9	6	35.9	48	324	9.88	12	9	14	14	13	14	6	6	7	9	7	9
High	Q92945	Far upstream element-binding protein 2 OS=Homo sapiens OX=9606 GN=KHSRP PE=1 SV=4	130	20	18	73.1	40	711	7.3	11	11	11	12	16	13	11	10	11	12	14	13
High	P43243	Matrin-3 OS=Homo sapiens OX=9606 GN=MATR3 PE=1 SV=2	130	25	25	94.6	38	847	6.25	15	14	16	11	10	9	13	10	14	11	10	9
High	P0DP25	Calmodulin-3 OS=Homo sapiens OX=9606 GN=CALM3 PE=1 SV=1	130	9	9	16.8	52	149	4.22	15	17	15	7	13	6	8	8	7	7	7	6
High	P17812	CTP synthase 1 OS=Homo sapiens OX=9606 GN=CTPS1 PE=1 SV=2	130	19	18	66.6	46	591	6.46	18	13	15	12	12	12	17	12	13	11	10	11
High	P09651	Heterogeneous nuclear ribonucleoprotein A1 OS=Homo sapiens OX=9606 GN=HNRNPA1 PE=1 SV=5	130	16	14	38.7	46	372	9.13	21	21	19	9	9	10	15	14	12	6	7	6
High	O60506	Heterogeneous nuclear ribonucleoprotein Q OS=Homo sapiens OX=9606 GN=SYNCRIP PE=1 SV=2	129	20	14	69.6	41	623	8.59	13	15	16	6	10	11	13	14	14	6	10	10
High	P06703	Protein S100-A6 OS=Homo sapiens OX=9606 GN=S100A6 PE=1 SV=1	129	3	3	10.2	19	90	5.48	13	9	16	13	13	14	2	2	2	3	2	3
High	Q8IXJ9	Polycomb group protein ASXL1 OS=Homo sapiens OX=9606 GN=ASXL1 PE=1 SV=4	128	26	25	165.3	23	1541	6.21				21	23	19				20	21	18
High	P60842	Eukaryotic initiation factor 4A-I OS=Homo sapiens OX=9606 GN=EIF4A1 PE=1 SV=1	128	18	10	46.1	54	406	5.48	17	16	20	9	13	13	13	14	17	9	11	11
High	P35221	Catenin alpha-1 OS=Homo sapiens OX=9606 GN=CTNNA1 PE=1 SV=1	127	28	28	100	40	906	6.29	21	21	17	5	6	7	21	20	17	5	6	7
High	Q03252	Lamin-B2 OS=Homo sapiens OX=9606 GN=LMNB2 PE=1 SV=4	127	27	24	69.9	40	620	5.59	23	20	26	7	8	7	16	16	20	6	6	7
High	P42224	Signal transducer and activator of transcription 1-alpha/beta OS=Homo sapiens OX=9606 GN=STAT1 PE=1 SV=2	126	23	23	87.3	36	750	6.05	17	14	16	9	17	11	16	13	15	9	14	11
High	Q15424	Scaffold attachment factor B1 OS=Homo sapiens OX=9606 GN=SAFB PE=1 SV=4	125	19	12	102.6	22	915	5.47	16	16	19	7	11	10	12	13	15	7	10	9
High	O75694	Nuclear pore complex protein Nup155 OS=Homo sapiens OX=9606 GN=NUP155 PE=1 SV=1	125	23	23	155.1	22	1391	6.16	13	12	17	8	8	6	13	12	14	7	6	6
High	Q15181	Inorganic pyrophosphatase OS=Homo sapiens OX=9606 GN=PPA1 PE=1 SV=2	125	16	15	32.6	71	289	5.86	13	14	16	7	16	10	10	12	13	5	8	7
High	P16144	Integrin beta-4 OS=Homo sapiens OX=9606 GN=ITGB4 PE=1 SV=5	125	32	32	202	24	1822	6.09	15	13	22	7	6	6	15	13	20	7	6	6
High	O60502	Protein O-GlcNAcase OS=Homo sapiens OX=9606 GN=OGA PE=1 SV=2	125	32	32	102.8	44	916	4.91	1	2		9	11	10	1	2		9	11	10
High	Q16891	MICOS complex subunit MIC60 OS=Homo sapiens OX=9606 GN=IMMT PE=1 SV=1	125	25	25	83.6	40	758	6.48	10	10	14	10	16	11	10	10	13	10	15	11
High	Q6WCQ1	Myosin phosphatase Rho-interacting protein OS=Homo sapiens OX=9606 GN=MPRIP PE=1 SV=3	124	37	37	116.5	48	1025	6.21	22	25	22	1		1	19	22	20	1		1
High	P36578	60S ribosomal protein L4 OS=Homo sapiens OX=9606 GN=RPL4 PE=1 SV=5	124	16	16	47.7	41	427	11.06	9	9	11	11	10	13	9	9	11	8	8	9
High	Q9BUJ2	Heterogeneous nuclear ribonucleoprotein U-like protein 1 OS=Homo sapiens OX=9606 GN=HNRNPUL1 PE=1 SV=2	124	20	20	95.7	28	856	6.92	18	17	20	7	6	7	17	15	17	7	6	7
High	Q9UHR4	Brain-specific angiogenesis inhibitor 1-associated protein 2-like protein 1 OS=Homo sapiens OX=9606 GN=BAIAP2L1 PE=1 SV=2	124	23	23	56.8	52	511	8.68	12	13	18	9	11	9	12	12	17	9	11	9
High	P48643	T-complex protein 1 subunit epsilon OS=Homo sapiens OX=9606 GN=CCT5 PE=1 SV=1	124	23	22	59.6	54	541	5.66	16	15	21	9	11	6	13	13	15	8	10	5
High	Q96CW1	AP-2 complex subunit mu OS=Homo sapiens OX=9606 GN=AP2M1 PE=1 SV=2	123	18	18	49.6	42	435	9.54	16	16	15	5	10	7	13	13	12	5	10	7
High	Q9P2N6	KAT8 regulatory NSL complex subunit 3 OS=Homo sapiens OX=9606 GN=KANSL3 PE=1 SV=2	123	25	25	95.9	45	904	9.39				19	22	19				17	18	16
High	Q7Z2W4	Zinc finger CCCH-type antiviral protein 1 OS=Homo sapiens OX=9606 GN=ZC3HAV1 PE=1 SV=3	122	23	23	101.4	33	902	8.4	5	4	5	19	11	19	5	4	5	17	11	17
High	Q9Y2T3	Guanine deaminase OS=Homo sapiens OX=9606 GN=GDA PE=1 SV=1	122	19	19	51	52	454	5.68	20	15	18	9	7	8	15	12	13	8	6	8
High	Q9Y265	RuvB-like 1 OS=Homo sapiens OX=9606 GN=RUVBL1 PE=1 SV=1	122	17	17	50.2	49	456	6.42	15	14	18	6	8	4	13	13	16	6	7	4
High	Q92804	TATA-binding protein-associated factor 2N OS=Homo sapiens OX=9606 GN=TAF15 PE=1 SV=1	122	9	7	61.8	22	592	8.02	14	18	29	6	16	8	9	9	8	4	7	5
High	P11586	C-1-tetrahydrofolate synthase, cytoplasmic OS=Homo sapiens OX=9606 GN=MTHFD1 PE=1 SV=4	122	24	23	101.5	30	935	7.3	15	14	13	5	16	6	13	13	13	5	15	6
High	P27816	Microtubule-associated protein 4 OS=Homo sapiens OX=9606 GN=MAP4 PE=1 SV=3	121	28	28	120.9	35	1152	5.43	5	9	7	13	13	12	5	9	6	13	13	12
High	P54136	Arginine--tRNA ligase, cytoplasmic OS=Homo sapiens OX=9606 GN=RARS1 PE=1 SV=2	121	27	27	75.3	46	660	6.68	12	13	12	11	10	11	12	11	11	10	10	10
High	Q06210	Glutamine--fructose-6-phosphate aminotransferase [isomerizing] 1 OS=Homo sapiens OX=9606 GN=GFPT1 PE=1 SV=3	121	22	19	78.8	39	699	7.11	11	12	13	7	13	11	11	12	12	7	13	10
High	Q9Y5B9	FACT complex subunit SPT16 OS=Homo sapiens OX=9606 GN=SUPT16H PE=1 SV=1	121	25	25	119.8	28	1047	5.66	16	16	13	9	17	12	16	16	13	9	15	12
High	O95994	Anterior gradient protein 2 homolog OS=Homo sapiens OX=9606 GN=AGR2 PE=1 SV=1	120	8	7	20	59	175	9	5	6	5	28	30	30	5	5	4	5	5	4
High	P50990	T-complex protein 1 subunit theta OS=Homo sapiens OX=9606 GN=CCT8 PE=1 SV=4	120	21	21	59.6	43	548	5.6	12	11	15	11	11	11	12	11	15	11	11	11
High	P50995	Annexin A11 OS=Homo sapiens OX=9606 GN=ANXA11 PE=1 SV=1	119	17	16	54.4	34	505	7.65	17	15	17	8	10	7	15	13	14	8	10	7
High	P61964	WD repeat-containing protein 5 OS=Homo sapiens OX=9606 GN=WDR5 PE=1 SV=1	119	11	11	36.6	46	334	8.27	3	1	3	14	20	16	3	1	3	8	10	8
High	Q15366	Poly(rC)-binding protein 2 OS=Homo sapiens OX=9606 GN=PCBP2 PE=1 SV=1	119	13	8	38.6	66	365	6.79	15	13	13	11	11	9	12	10	9	6	7	6
High	O00425	Insulin-like growth factor 2 mRNA-binding protein 3 OS=Homo sapiens OX=9606 GN=IGF2BP3 PE=1 SV=2	119	19	17	63.7	42	579	8.87	11	9	10	8	11	13	11	9	10	8	10	12
High	P49368	T-complex protein 1 subunit gamma OS=Homo sapiens OX=9606 GN=CCT3 PE=1 SV=4	119	22	22	60.5	53	545	6.49	12	13	15	10	8	11	10	12	14	10	8	10
High	P08590	Myosin light chain 3 OS=Homo sapiens OX=9606 GN=MYL3 PE=1 SV=3	118	10	7	21.9	51	195	5.1	13	13	16	10	10	14	7	7	6	8	5	8
High	P35658	Nuclear pore complex protein Nup214 OS=Homo sapiens OX=9606 GN=NUP214 PE=1 SV=2	117	29	29	213.5	22	2090	7.47	3	3	1	10	10	11	3	3	1	10	10	11
High	P31946	14-3-3 protein beta/alpha OS=Homo sapiens OX=9606 GN=YWHAB PE=1 SV=3	116	10	5	28.1	48	246	4.83	13	12	16	11	11	12	8	8	8	8	7	8
High	Q9NSB2	SWISS-PROT:Q9NSB2 Keratin, type II cuticular Hb4 (Hair keratin, type II Hb4) - Homo sapiens (Human).	116	4	1	64.9	4	600	7.74	16	22	32	7	9	8	4	4	3	2	2	2
High	O75533	Splicing factor 3B subunit 1 OS=Homo sapiens OX=9606 GN=SF3B1 PE=1 SV=3	116	26	26	145.7	28	1304	7.09	13	13	10	8	13	9	13	13	10	8	13	9
High	Q9Y2W1	Thyroid hormone receptor-associated protein 3 OS=Homo sapiens OX=9606 GN=THRAP3 PE=1 SV=2	116	22	21	108.6	28	955	10.15	11	11	10	10	16	12	11	11	9	10	15	12
High	P51991	Heterogeneous nuclear ribonucleoprotein A3 OS=Homo sapiens OX=9606 GN=HNRNPA3 PE=1 SV=2	115	17	16	39.6	39	378	9.01	17	14	19	5	12	6	13	13	12	4	9	4
High	P33176	Kinesin-1 heavy chain OS=Homo sapiens OX=9606 GN=KIF5B PE=1 SV=1	115	25	25	109.6	30	963	6.51	1	4	6	18	16	17	1	4	6	16	16	16
High	Q6KB66-1	SWISS-PROT:Q6KB66-1 Tax_Id=9606 Gene_Symbol=KRT80 Isoform 1 of Keratin, type II cytoskeletal 80	115	22	21	50.5	49	452	5.67	23	15	16	11	10	9	16	14	15	11	10	9
High	P31943	Heterogeneous nuclear ribonucleoprotein H OS=Homo sapiens OX=9606 GN=HNRNPH1 PE=1 SV=4	115	10	4	49.2	32	449	6.3	15	12	13	7	12	7	8	8	8	6	8	6
High	O75955	Flotillin-1 OS=Homo sapiens OX=9606 GN=FLOT1 PE=1 SV=3	115	23	23	47.3	68	427	7.49	13	11	12	5	2	3	12	9	12	5	2	3
High	O15020	Spectrin beta chain, non-erythrocytic 2 OS=Homo sapiens OX=9606 GN=SPTBN2 PE=1 SV=3	115	29	19	271.2	15	2390	6.11	19	20	20	4	2	2	15	16	19	4	2	2
High	P27635	60S ribosomal protein L10 OS=Homo sapiens OX=9606 GN=RPL10 PE=1 SV=5	115	10	10	24.6	43	214	10.08	9	11	11	11	11	8	7	8	8	6	6	5
High	P12236	ADP/ATP translocase 3 OS=Homo sapiens OX=9606 GN=SLC25A6 PE=1 SV=4	114	16	6	32.8	57	298	9.74	14	13	15	5	9	5	11	12	11	5	8	4
High	Q92499	ATP-dependent RNA helicase DDX1 OS=Homo sapiens OX=9606 GN=DDX1 PE=1 SV=2	113	22	22	82.4	34	740	7.23	14	12	15	7	13	7	14	12	14	7	13	7
High	P53992	Protein transport protein Sec24C OS=Homo sapiens OX=9606 GN=SEC24C PE=1 SV=3	113	23	22	118.2	27	1094	7.06	8	10	11	10	14	11	8	10	11	9	11	11
High	Q8N1F7	Nuclear pore complex protein Nup93 OS=Homo sapiens OX=9606 GN=NUP93 PE=1 SV=2	113	32	32	93.4	44	819	5.72	23	20	20	2	1	2	23	19	20	2	1	1
High	Q9NSD9	Phenylalanine--tRNA ligase beta subunit OS=Homo sapiens OX=9606 GN=FARSB PE=1 SV=3	112	20	20	66.1	33	589	6.84	13	14	14	9	12	9	13	13	12	9	12	9
High	P62241	40S ribosomal protein S8 OS=Homo sapiens OX=9606 GN=RPS8 PE=1 SV=2	112	10	10	24.2	52	208	10.32	10	9	10	14	11	13	9	9	9	10	9	10
High	P26599	Polypyrimidine tract-binding protein 1 OS=Homo sapiens OX=9606 GN=PTBP1 PE=1 SV=1	111	14	11	57.2	42	531	9.17	10	10	11	9	10	12	9	9	10	8	6	8
High	P52597	Heterogeneous nuclear ribonucleoprotein F OS=Homo sapiens OX=9606 GN=HNRNPF PE=1 SV=3	111	13	11	45.6	49	415	5.58	13	14	12	5	10	8	9	10	7	5	6	6
High	P78371	T-complex protein 1 subunit beta OS=Homo sapiens OX=9606 GN=CCT2 PE=1 SV=4	111	18	18	57.5	48	535	6.46	13	12	13	6	6	8	13	12	11	6	6	8
High	P04083	Annexin A1 OS=Homo sapiens OX=9606 GN=ANXA1 PE=1 SV=2	111	18	18	38.7	60	346	7.02	10	9	13	9	13	9	8	9	11	9	11	9
High	P46109	Crk-like protein OS=Homo sapiens OX=9606 GN=CRKL PE=1 SV=1	110	13	13	33.8	65	303	6.74	9	9	10	7	10	6	9	9	9	6	7	5
High	Q99714	3-hydroxyacyl-CoA dehydrogenase type-2 OS=Homo sapiens OX=9606 GN=HSD17B10 PE=1 SV=3	110	14	14	26.9	74	261	7.78	10	11	7	8	9	10	9	9	6	6	5	8
High	Q07955	Serine/arginine-rich splicing factor 1 OS=Homo sapiens OX=9606 GN=SRSF1 PE=1 SV=2	110	11	11	27.7	38	248	10.36	11	9	11	11	14	10	8	7	8	8	9	8
High	O60701	UDP-glucose 6-dehydrogenase OS=Homo sapiens OX=9606 GN=UGDH PE=1 SV=1	110	19	19	55	54	494	7.12	17	14	18	7	8	9	16	13	16	7	8	8
High	Q99497	Parkinson disease protein 7 OS=Homo sapiens OX=9606 GN=PARK7 PE=1 SV=2	110	10	10	19.9	58	189	6.79	12	14	11	7	14	8	8	8	7	5	7	5
High	Q12929	Epidermal growth factor receptor kinase substrate 8 OS=Homo sapiens OX=9606 GN=EPS8 PE=1 SV=1	109	24	24	91.8	42	822	7.5	13	14	15	1	2	1	13	13	14	1	2	1
High	P47755	F-actin-capping protein subunit alpha-2 OS=Homo sapiens OX=9606 GN=CAPZA2 PE=1 SV=3	109	11	9	32.9	65	286	5.85	11	12	9	3	6	4	8	7	8	3	5	3
High	Q93009	Ubiquitin carboxyl-terminal hydrolase 7 OS=Homo sapiens OX=9606 GN=USP7 PE=1 SV=2	109	22	22	128.2	24	1102	5.55	9	8	5	12	17	12	9	7	5	12	16	12
High	Q9H6S3	Epidermal growth factor receptor kinase substrate 8-like protein 2 OS=Homo sapiens OX=9606 GN=EPS8L2 PE=1 SV=2	108	21	21	80.6	37	715	6.84	11	11	11	7	13	10	11	11	11	7	13	10
High	Q12931	Heat shock protein 75 kDa, mitochondrial OS=Homo sapiens OX=9606 GN=TRAP1 PE=1 SV=3	107	19	18	80.1	37	704	8.21	7	9	14	10	7	7	7	8	10	9	6	6
High	O60437	Periplakin OS=Homo sapiens OX=9606 GN=PPL PE=1 SV=4	107	36	36	204.6	24	1756	5.6	17	22	28	6	5	3	17	21	26	6	5	3
High	O00443	Phosphatidylinositol 4-phosphate 3-kinase C2 domain-containing subunit alpha OS=Homo sapiens OX=9606 GN=PIK3C2A PE=1 SV=2	106	35	35	190.6	25	1686	8.02	8	12	12	3	2	3	8	12	12	3	2	3
High	P55060	Exportin-2 OS=Homo sapiens OX=9606 GN=CSE1L PE=1 SV=3	106	17	17	110.3	20	971	5.77	10	12	15	9	10	10	9	10	14	8	10	10
High	Q96E39	RNA binding motif protein, X-linked-like-1 OS=Homo sapiens OX=9606 GN=RBMXL1 PE=1 SV=1	106	13	1	42.1	34	390	9.89	10	12	19	7	10	11	8	10	13	7	9	9
High	O60716	Catenin delta-1 OS=Homo sapiens OX=9606 GN=CTNND1 PE=1 SV=1	105	21	21	108.1	31	968	6.23	13	16	15	7	3	6	13	16	14	7	3	6
High	P62280	40S ribosomal protein S11 OS=Homo sapiens OX=9606 GN=RPS11 PE=1 SV=3	105	11	11	18.4	52	158	10.3	11	12	13	8	11	9	9	10	11	8	7	8
High	Q13501	Sequestosome-1 OS=Homo sapiens OX=9606 GN=SQSTM1 PE=1 SV=1	105	12	12	47.7	58	440	5.22	4	5	4	18	26	22	4	5	4	10	11	10
High	Q9UGI8	Testin OS=Homo sapiens OX=9606 GN=TES PE=1 SV=1	104	15	15	48	41	421	7.68	11	12	13	8	11	8	10	11	10	8	10	8
High	P35237	Serpin B6 OS=Homo sapiens OX=9606 GN=SERPINB6 PE=1 SV=3	104	13	12	42.6	47	376	5.27	8	9	16	7	10	6	7	8	13	6	7	6
High	Q9Y608	Leucine-rich repeat flightless-interacting protein 2 OS=Homo sapiens OX=9606 GN=LRRFIP2 PE=1 SV=1	104	15	14	82.1	25	721	6.95	13	13	19	6	7	9	10	10	15	6	6	9
High	P61981	14-3-3 protein gamma OS=Homo sapiens OX=9606 GN=YWHAG PE=1 SV=2	104	9	4	28.3	38	247	4.89	10	11	15	10	11	13	7	8	7	6	6	7
High	P41240	Tyrosine-protein kinase CSK OS=Homo sapiens OX=9606 GN=CSK PE=1 SV=1	104	16	15	50.7	41	450	7.06	9	11	7	10	12	11	9	10	7	10	12	10
High	P10515	Dihydrolipoyllysine-residue acetyltransferase component of pyruvate dehydrogenase complex, mitochondrial OS=Homo sapiens OX=9606 GN=DLAT PE=1 SV=3	104	15	15	69	28	647	7.84	4	4	7	9	10	9	4	4	7	6	8	7
High	Q92621	Nuclear pore complex protein Nup205 OS=Homo sapiens OX=9606 GN=NUP205 PE=1 SV=3	103	34	34	227.8	19	2012	6.19	23	25	27	2	2	1	23	25	25	2	2	1
High	Q10567	AP-1 complex subunit beta-1 OS=Homo sapiens OX=9606 GN=AP1B1 PE=1 SV=3	103	22	7	104.5	25	949	5.06	7	10	14	6	5	8	7	10	13	6	4	8
High	Q7Z794	Keratin, type II cytoskeletal 1b OS=Homo sapiens OX=9606 GN=KRT77 PE=1 SV=3	102	5	1	61.9	6	578	5.99	13	18	31	6	7	8	4	4	4	3	2	3
High	Q9ULA0	Aspartyl aminopeptidase OS=Homo sapiens OX=9606 GN=DNPEP PE=1 SV=2	102	14	14	53.4	33	485	7.58	10	11	10	9	11	9	9	9	8	7	8	8
High	P30101	Protein disulfide-isomerase A3 OS=Homo sapiens OX=9606 GN=PDIA3 PE=1 SV=4	102	20	20	56.7	48	505	6.35	10	12	16	9	8	9	9	12	14	9	8	9
High	Q02878	60S ribosomal protein L6 OS=Homo sapiens OX=9606 GN=RPL6 PE=1 SV=3	101	12	12	32.7	35	288	10.58	9	9	8	11	12	11	9	9	7	10	10	10
High	P13797	Plastin-3 OS=Homo sapiens OX=9606 GN=PLS3 PE=1 SV=4	101	24	16	70.8	47	630	5.6	8	12	10	11	11	13	7	11	10	11	11	13
High	Q69YQ0	Cytospin-A OS=Homo sapiens OX=9606 GN=SPECC1L PE=1 SV=3	101	27	27	124.5	29	1117	5.76	17	22	19		1		17	21	18		1
High	P61106	Ras-related protein Rab-14 OS=Homo sapiens OX=9606 GN=RAB14 PE=1 SV=4	100	14	13	23.9	78	215	6.21	10	10	9	7	12	7	7	7	7	7	9	7
High	P07744	SWISS-PROT:P07744 Tax_Id=10090 Gene_Symbol=Krt4 Keratin, type II cytoskeletal 4	100	5	1	56.2	6	525	8.15	13	18	30	5	6	7	3	3	4	2	3	2
High	Q13557	Calcium/calmodulin-dependent protein kinase type II subunit delta OS=Homo sapiens OX=9606 GN=CAMK2D PE=1 SV=3	100	14	11	56.3	32	499	7.25	10	11	11	8	9	7	10	11	10	8	9	7
High	Q8WUM4	Programmed cell death 6-interacting protein OS=Homo sapiens OX=9606 GN=PDCD6IP PE=1 SV=1	100	25	25	96	32	868	6.52	9	11	13	5	3	5	9	11	13	5	3	5
High	P18124	60S ribosomal protein L7 OS=Homo sapiens OX=9606 GN=RPL7 PE=1 SV=1	100	17	17	29.2	52	248	10.65	6	7	11	9	10	10	5	6	9	9	9	8
High	P62249	40S ribosomal protein S16 OS=Homo sapiens OX=9606 GN=RPS16 PE=1 SV=2	100	7	7	16.4	44	146	10.21	9	10	10	6	9	7	5	6	7	6	7	5
High	Q15393	Splicing factor 3B subunit 3 OS=Homo sapiens OX=9606 GN=SF3B3 PE=1 SV=4	99	19	19	135.5	18	1217	5.26	2	5	9	14	16	14	2	5	8	13	14	13
High	P04899	Guanine nucleotide-binding protein G(i) subunit alpha-2 OS=Homo sapiens OX=9606 GN=GNAI2 PE=1 SV=3	99	15	9	40.4	59	355	5.54	11	9	11	7	8	8	9	7	10	6	7	7
High	Q5SRE5	Nucleoporin NUP188 OS=Homo sapiens OX=9606 GN=NUP188 PE=1 SV=1	99	27	27	195.9	19	1749	6.73	5	7	6	5	11	6	5	7	6	5	11	5
High	P46087	Probable 28S rRNA (cytosine(4447)-C(5))-methyltransferase OS=Homo sapiens OX=9606 GN=NOP2 PE=1 SV=2	99	19	19	89.2	29	812	9.23	6	3	5	13	16	14	6	3	4	13	16	14
High	P62826	GTP-binding nuclear protein Ran OS=Homo sapiens OX=9606 GN=RAN PE=1 SV=3	99	9	9	24.4	35	216	7.49	7	7	6	5	5	5	6	6	5	5	5	5
High	P55795	Heterogeneous nuclear ribonucleoprotein H2 OS=Homo sapiens OX=9606 GN=HNRNPH2 PE=1 SV=1	99	11	6	49.2	35	449	6.3	13	11	10	7	9	6	8	7	8	6	7	5
High	P45974	Ubiquitin carboxyl-terminal hydrolase 5 OS=Homo sapiens OX=9606 GN=USP5 PE=1 SV=2	98	16	16	95.7	26	858	5.03	10	9	13	10	9	10	10	9	10	10	7	10
High	P50991	T-complex protein 1 subunit delta OS=Homo sapiens OX=9606 GN=CCT4 PE=1 SV=4	98	18	17	57.9	42	539	7.83	7	10	13	8	7	10	7	9	11	8	7	10
High	Q13200	26S proteasome non-ATPase regulatory subunit 2 OS=Homo sapiens OX=9606 GN=PSMD2 PE=1 SV=3	98	22	22	100.1	28	908	5.2	3	2	5	15	16	16	3	2	5	15	15	16
High	Q9UHX1	Poly(U)-binding-splicing factor PUF60 OS=Homo sapiens OX=9606 GN=PUF60 PE=1 SV=1	98	14	14	59.8	35	559	5.29	8	7	9	9	11	10	8	7	9	8	10	10
High	O43684	Mitotic checkpoint protein BUB3 OS=Homo sapiens OX=9606 GN=BUB3 PE=1 SV=1	97	11	11	37.1	35	328	6.84	5	5	4	15	18	13	5	5	4	11	11	9
High	Q9Y3I0	RNA-splicing ligase RtcB homolog OS=Homo sapiens OX=9606 GN=RTCB PE=1 SV=1	97	19	19	55.2	45	505	7.23	12	10	15	6	9	6	12	9	13	6	9	6
High	P33993	DNA replication licensing factor MCM7 OS=Homo sapiens OX=9606 GN=MCM7 PE=1 SV=4	97	26	26	81.3	45	719	6.46	20	20	15	3	6	4	17	19	14	3	6	4
High	P27694	Replication protein A 70 kDa DNA-binding subunit OS=Homo sapiens OX=9606 GN=RPA1 PE=1 SV=2	97	25	25	68.1	44	616	7.21	20	18	22	6	6	6	19	18	21	6	6	6
High	Q13310	Polyadenylate-binding protein 4 OS=Homo sapiens OX=9606 GN=PABPC4 PE=1 SV=1	96	17	11	70.7	29	644	9.26	7	7	8	8	12	11	7	7	8	8	11	10
High	P04406	Glyceraldehyde-3-phosphate dehydrogenase OS=Homo sapiens OX=9606 GN=GAPDH PE=1 SV=3	96	11	11	36	43	335	8.46	13	14	17	5	5	5	9	10	10	5	4	5
High	P14866	Heterogeneous nuclear ribonucleoprotein L OS=Homo sapiens OX=9606 GN=HNRNPL PE=1 SV=2	96	18	17	64.1	48	589	8.22	8	9	10	5	15	8	7	9	10	5	14	8
High	P84243	Histone H3.3 OS=Homo sapiens OX=9606 GN=H3-3A PE=1 SV=2	95	3	1	15.3	17	136	11.27	9	9	17	12	7	14	2	2	3	2	3	2
High	P50402	Emerin OS=Homo sapiens OX=9606 GN=EMD PE=1 SV=1	95	13	13	29	73	254	5.5	16	17	10	5	6	5	12	13	10	4	6	4
High	P07237	Protein disulfide-isomerase OS=Homo sapiens OX=9606 GN=P4HB PE=1 SV=3	95	20	20	57.1	42	508	4.87	10	10	14	3	7	3	8	9	10	3	7	3
High	P18621	60S ribosomal protein L17 OS=Homo sapiens OX=9606 GN=RPL17 PE=1 SV=3	95	7	7	21.4	42	184	10.17	8	9	11	6	6	5	6	6	5	4	4	3
High	P00338	L-lactate dehydrogenase A chain OS=Homo sapiens OX=9606 GN=LDHA PE=1 SV=2	95	14	13	36.7	52	332	8.27	14	16	16	4	8	4	10	12	11	4	8	3
High	Q9UJS0	Calcium-binding mitochondrial carrier protein Aralar2 OS=Homo sapiens OX=9606 GN=SLC25A13 PE=1 SV=2	95	20	15	74.1	38	675	8.62	13	15	19	3	7	6	13	15	17	3	7	6
High	Q13428	Treacle protein OS=Homo sapiens OX=9606 GN=TCOF1 PE=1 SV=3	95	20	20	152	16	1488	9.04	5	6	7	11	10	10	5	5	7	11	9	10
High	P05388	60S acidic ribosomal protein P0 OS=Homo sapiens OX=9606 GN=RPLP0 PE=1 SV=1	94	8	8	34.3	28	317	5.97	8	8	9	10	7	11	7	7	7	7	6	7
High	Q7RTS7	SWISS-PROT:Q7RTS7 Tax_Id=9606 Gene_Symbol=KRT74 Keratin, type II cytoskeletal 74	94	5	1	57.8	7	529	7.71	12	17	30	5	6	7	3	3	5	2	3	2
High	P07947	Tyrosine-protein kinase Yes OS=Homo sapiens OX=9606 GN=YES1 PE=1 SV=3	94	18	10	60.8	39	543	6.74	8	9	10	8	6	8	7	7	7	7	5	8
High	Q9ULV4	Coronin-1C OS=Homo sapiens OX=9606 GN=CORO1C PE=1 SV=1	94	18	17	53.2	46	474	7.08	16	12	15	4	5	4	13	11	13	4	5	4
High	P31629	Transcription factor HIVEP2 OS=Homo sapiens OX=9606 GN=HIVEP2 PE=1 SV=2	94	36	33	268.9	18	2446	6.96				23	27	24				23	27	23
High	Q32MZ4	Leucine-rich repeat flightless-interacting protein 1 OS=Homo sapiens OX=9606 GN=LRRFIP1 PE=1 SV=2	94	15	14	89.2	27	808	4.65	8	7	11	7	10	7	8	7	9	6	8	7
High	P09661	U2 small nuclear ribonucleoprotein A' OS=Homo sapiens OX=9606 GN=SNRPA1 PE=1 SV=2	94	12	12	28.4	47	255	8.62	3	2	1	13	18	13	3	2	1	10	10	8
High	P08865	40S ribosomal protein SA OS=Homo sapiens OX=9606 GN=RPSA PE=1 SV=4	93	10	10	32.8	52	295	4.87	11	10	11	6	7	7	9	9	7	5	6	6
High	Q15437	Protein transport protein Sec23B OS=Homo sapiens OX=9606 GN=SEC23B PE=1 SV=2	93	16	13	86.4	26	767	6.89	11	11	12	7	7	8	10	11	12	7	7	7
High	Q14151	Scaffold attachment factor B2 OS=Homo sapiens OX=9606 GN=SAFB2 PE=1 SV=1	93	18	11	107.4	25	953	6.16	13	17	15	4	4	6	11	13	12	4	3	5
High	P02769	SWISS-PROT:P02769 (Bos taurus) Bovine serum albumin precursor	92	20	16	69.2	39	607	6.18	5	18	3	10	13	9	5	13	3	9	11	8
High	Q04917	14-3-3 protein eta OS=Homo sapiens OX=9606 GN=YWHAH PE=1 SV=4	92	12	8	28.2	49	246	4.84	9	9	12	8	9	9	7	6	6	5	6	6
High	P31040	Succinate dehydrogenase [ubiquinone] flavoprotein subunit, mitochondrial OS=Homo sapiens OX=9606 GN=SDHA PE=1 SV=2	92	18	18	72.6	33	664	7.39	11	11	12	4	11	8	11	11	10	4	11	8
High	O95372	Acyl-protein thioesterase 2 OS=Homo sapiens OX=9606 GN=LYPLA2 PE=1 SV=1	92	9	9	24.7	52	231	7.23	11	14	12	3	7	4	7	8	8	3	6	4
High	O95793	Double-stranded RNA-binding protein Staufen homolog 1 OS=Homo sapiens OX=9606 GN=STAU1 PE=1 SV=2	91	19	17	63.1	41	577	9.44	4	7	8	10	11	9	3	6	7	10	11	9
High	P31947	14-3-3 protein sigma OS=Homo sapiens OX=9606 GN=SFN PE=1 SV=1	91	12	8	27.8	53	248	4.74	7	10	13	7	6	7	5	7	7	6	4	4
High	Q07666	KH domain-containing, RNA-binding, signal transduction-associated protein 1 OS=Homo sapiens OX=9606 GN=KHDRBS1 PE=1 SV=1	91	7	7	48.2	24	443	8.66	10	6	11	9	5	11	6	4	7	5	5	5
High	O43795	Unconventional myosin-Ib OS=Homo sapiens OX=9606 GN=MYO1B PE=1 SV=3	91	29	29	131.9	30	1136	9.38	10	10	12	2	1	2	10	9	12	2	1	2
High	Q08J23	RNA cytosine C(5)-methyltransferase NSUN2 OS=Homo sapiens OX=9606 GN=NSUN2 PE=1 SV=2	90	22	22	86.4	40	767	6.77	11	10	11	6	11	9	10	9	8	6	10	9
High	Q9NQX4	Unconventional myosin-Vc OS=Homo sapiens OX=9606 GN=MYO5C PE=1 SV=2	90	27	23	202.7	17	1742	7.71	8	11	11	2	3	3	7	11	9	2	3	3
High	P63279	SUMO-conjugating enzyme UBC9 OS=Homo sapiens OX=9606 GN=UBE2I PE=1 SV=1	90	7	7	18	34	158	8.66	5	6	5	5	5	3	4	4	4	3	3	2
High	Q14254	Flotillin-2 OS=Homo sapiens OX=9606 GN=FLOT2 PE=1 SV=2	90	15	15	47	44	428	5.25	12	11	11	2	2	2	11	11	10	2	2	2
High	P55196	Afadin OS=Homo sapiens OX=9606 GN=AFDN PE=1 SV=3	90	30	30	206.7	23	1824	6.47	11	14	15	4	5	3	11	14	15	4	5	3
High	O00468	Agrin OS=Homo sapiens OX=9606 GN=AGRN PE=1 SV=6	89	27	27	217.2	19	2068	6.39	10	8	4	6	8	4	8	6	4	5	8	3
High	P31930	Cytochrome b-c1 complex subunit 1, mitochondrial OS=Homo sapiens OX=9606 GN=UQCRC1 PE=1 SV=3	89	13	12	52.6	40	480	6.37	12	11	12	9	9	9	10	11	11	8	8	8
High	P56192	Methionine--tRNA ligase, cytoplasmic OS=Homo sapiens OX=9606 GN=MARS1 PE=1 SV=2	88	18	18	101.1	25	900	6.16	10	9	13	1	4	2	9	8	12	1	4	2
High	Q13057	Bifunctional coenzyme A synthase OS=Homo sapiens OX=9606 GN=COASY PE=1 SV=4	88	16	16	62.3	35	564	6.99	7	9	12	6	8	7	7	9	11	6	8	7
High	Q9HCC0	Methylcrotonoyl-CoA carboxylase beta chain, mitochondrial OS=Homo sapiens OX=9606 GN=MCCC2 PE=1 SV=1	88	19	19	61.3	41	563	7.68	8	7	8	8	11	8	7	7	7	7	11	8
High	P42167	Lamina-associated polypeptide 2, isoforms beta/gamma OS=Homo sapiens OX=9606 GN=TMPO PE=1 SV=2	88	12	7	50.6	41	454	9.38	12	12	10	8	7	6	10	9	8	8	7	6
High	O60547	GDP-mannose 4,6 dehydratase OS=Homo sapiens OX=9606 GN=GMDS PE=1 SV=1	88	14	14	41.9	45	372	7.31	9	9	10	6	10	7	9	9	9	6	8	7
High	Q9P0K7	Ankycorbin OS=Homo sapiens OX=9606 GN=RAI14 PE=1 SV=2	88	28	28	110	36	980	6.21	13	18	17				13	18	17
High	Q6YN16	Hydroxysteroid dehydrogenase-like protein 2 OS=Homo sapiens OX=9606 GN=HSDL2 PE=1 SV=1	88	17	17	45.4	50	418	7.99	11	10	9	4	5	4	9	9	7	4	5	4
High	P12931	Proto-oncogene tyrosine-protein kinase Src OS=Homo sapiens OX=9606 GN=SRC PE=1 SV=3	88	18	10	59.8	41	536	7.42	8	9	10	6	6	8	8	9	9	6	6	7
High	P55786	Puromycin-sensitive aminopeptidase OS=Homo sapiens OX=9606 GN=NPEPPS PE=1 SV=2	88	19	19	103.2	23	919	5.72	13	16	16	5	6	5	13	14	13	5	6	5
High	P62750	60S ribosomal protein L23a OS=Homo sapiens OX=9606 GN=RPL23A PE=1 SV=1	88	8	8	17.7	33	156	10.45	6	8	8	9	12	9	5	7	6	6	5	5
High	Q9UPU5	Ubiquitin carboxyl-terminal hydrolase 24 OS=Homo sapiens OX=9606 GN=USP24 PE=1 SV=3	88	29	29	294.2	14	2620	6.14	14	8	14	2	3	3	14	8	14	2	3	3
High	Q99832	T-complex protein 1 subunit eta OS=Homo sapiens OX=9606 GN=CCT7 PE=1 SV=2	87	17	17	59.3	38	543	7.65	8	9	7	9	11	6	6	8	6	8	11	6
High	Q96PK6	RNA-binding protein 14 OS=Homo sapiens OX=9606 GN=RBM14 PE=1 SV=2	87	17	17	69.4	30	669	9.67	13	11	16	6	7	7	10	8	14	6	6	7
High	Q14677	Clathrin interactor 1 OS=Homo sapiens OX=9606 GN=CLINT1 PE=1 SV=1	87	14	14	68.2	28	625	6.42	5	7	8	3	3	2	5	7	8	3	3	2
High	P22234	Multifunctional protein ADE2 OS=Homo sapiens OX=9606 GN=PAICS PE=1 SV=3	87	13	13	47	39	425	7.23	7	9	14	7	9	8	5	6	9	7	8	8
High	Q9HBD1	Roquin-2 OS=Homo sapiens OX=9606 GN=RC3H2 PE=1 SV=2	87	23	19	131.6	30	1191	6.89				17	16	16				15	14	15
High	P05091	Aldehyde dehydrogenase, mitochondrial OS=Homo sapiens OX=9606 GN=ALDH2 PE=1 SV=2	87	19	16	56.3	44	517	7.05	11	9	11	6	6	6	7	7	9	6	6	6
High	Q9Y6K5	2'-5'-oligoadenylate synthase 3 OS=Homo sapiens OX=9606 GN=OAS3 PE=1 SV=3	87	21	21	121.1	24	1087	8.4	6	5	3	12	14	10	6	5	3	12	14	10
High	Q86VP6	Cullin-associated NEDD8-dissociated protein 1 OS=Homo sapiens OX=9606 GN=CAND1 PE=1 SV=2	86	22	22	136.3	20	1230	5.78	8	12	10	6	7	4	8	11	10	6	7	4
High	Q9P2J5	Leucine--tRNA ligase, cytoplasmic OS=Homo sapiens OX=9606 GN=LARS1 PE=1 SV=2	86	24	24	134.4	24	1176	7.3	13	13	14		5	2	12	12	14		5	2
High	P13489	Ribonuclease inhibitor OS=Homo sapiens OX=9606 GN=RNH1 PE=1 SV=2	86	15	15	49.9	48	461	4.82	11	10	9	6	7	8	11	10	9	5	7	6
High	Q99959	Plakophilin-2 OS=Homo sapiens OX=9606 GN=PKP2 PE=1 SV=2	86	20	20	97.4	30	881	9.33	18	17	14	3	5	4	17	16	12	3	5	4
High	P08754	Guanine nucleotide-binding protein G(i) subunit alpha-3 OS=Homo sapiens OX=9606 GN=GNAI3 PE=1 SV=3	86	12	6	40.5	44	354	5.69	8	7	10	5	7	6	6	5	9	4	6	5
High	P42704	Leucine-rich PPR motif-containing protein, mitochondrial OS=Homo sapiens OX=9606 GN=LRPPRC PE=1 SV=3	85	25	25	157.8	21	1394	6.13	10	7	8	6	7	5	10	7	8	6	7	5
High	P07195	L-lactate dehydrogenase B chain OS=Homo sapiens OX=9606 GN=LDHB PE=1 SV=2	85	13	12	36.6	46	334	6.05	13	15	14	4	4	2	10	12	8	4	4	2
High	O60841	Eukaryotic translation initiation factor 5B OS=Homo sapiens OX=9606 GN=EIF5B PE=1 SV=4	85	16	16	138.7	19	1220	5.49	4	4	7	8	9	9	4	4	7	8	9	9
High	Q16643	Drebrin OS=Homo sapiens OX=9606 GN=DBN1 PE=1 SV=4	85	10	10	71.4	24	649	4.45	13	9	12	6	5	5	10	7	10	5	4	5
High	Q86UE4	Protein LYRIC OS=Homo sapiens OX=9606 GN=MTDH PE=1 SV=2	84	17	17	63.8	38	582	9.32	5	5	6	7	10	9	5	4	6	7	10	9
High	P30153	Serine/threonine-protein phosphatase 2A 65 kDa regulatory subunit A alpha isoform OS=Homo sapiens OX=9606 GN=PPP2R1A PE=1 SV=4	84	15	15	65.3	32	589	5.11	8	8	6	10	6	9	7	8	5	9	5	9
High	Q6PKG0	La-related protein 1 OS=Homo sapiens OX=9606 GN=LARP1 PE=1 SV=2	84	21	21	123.4	27	1096	8.82	5	5	8	7	9	8	5	5	8	7	9	8
High	Q5T4S7	E3 ubiquitin-protein ligase UBR4 OS=Homo sapiens OX=9606 GN=UBR4 PE=1 SV=1	84	35	35	573.5	9	5183	6.04	9	9	10	3	3	2	9	9	10	3	3	2
High	Q8NC51	Plasminogen activator inhibitor 1 RNA-binding protein OS=Homo sapiens OX=9606 GN=SERBP1 PE=1 SV=2	83	10	10	44.9	29	408	8.65	7	8	10	8	10	8	5	6	7	5	8	6
High	Q9Y2A7	Nck-associated protein 1 OS=Homo sapiens OX=9606 GN=NCKAP1 PE=1 SV=1	83	23	23	128.7	23	1128	6.62	6	6	9	7	11	6	6	6	7	7	11	6
High	Q9H2U2	Inorganic pyrophosphatase 2, mitochondrial OS=Homo sapiens OX=9606 GN=PPA2 PE=1 SV=2	83	13	12	37.9	49	334	7.39	11	6	9	6	9	6	9	5	8	5	6	6
High	O00567	Nucleolar protein 56 OS=Homo sapiens OX=9606 GN=NOP56 PE=1 SV=4	83	16	16	66	31	594	9.19	4	6	4	8	7	10	3	4	4	8	7	9
High	P05976	Myosin light chain 1/3, skeletal muscle isoform OS=Homo sapiens OX=9606 GN=MYL1 PE=1 SV=3	83	4	2	21.1	18	194	5.03	9	9	13	6	8	10	3	3	3	3	3	4
High	P46977	Dolichyl-diphosphooligosaccharide--protein glycosyltransferase subunit STT3A OS=Homo sapiens OX=9606 GN=STT3A PE=1 SV=2	82	14	13	80.5	18	705	8.07	9	13	11	6	8	5	8	12	10	6	8	5
High	Q9Y446	Plakophilin-3 OS=Homo sapiens OX=9606 GN=PKP3 PE=1 SV=1	82	16	16	87	22	797	9.32	10	10	11	3	9	9	10	10	11	3	8	9
High	O00515	Ladinin-1 OS=Homo sapiens OX=9606 GN=LAD1 PE=1 SV=2	82	15	15	57.1	32	517	9.67	7	4	7	5	7	6	7	4	6	5	7	6
High	P33991	DNA replication licensing factor MCM4 OS=Homo sapiens OX=9606 GN=MCM4 PE=1 SV=5	82	19	19	96.5	26	863	6.74	12	14	18	6	7	7	11	13	15	6	6	7
High	Q9BYB4	Guanine nucleotide-binding protein subunit beta-like protein 1 OS=Homo sapiens OX=9606 GN=GNB1L PE=1 SV=2	82	13	13	35.6	46	327	7.97	9	6	7	8	7	9	7	6	7	6	5	7
High	A8MW92	PHD finger protein 20-like protein 1 OS=Homo sapiens OX=9606 GN=PHF20L1 PE=1 SV=2	81	19	19	114.9	23	1017	6.83				11	17	10				11	14	10
High	P62140	Serine/threonine-protein phosphatase PP1-beta catalytic subunit OS=Homo sapiens OX=9606 GN=PPP1CB PE=1 SV=3	81	9	3	37.2	36	327	6.19	12	9	7	6	5	5	7	7	6	6	5	5
High	Q14839	Chromodomain-helicase-DNA-binding protein 4 OS=Homo sapiens OX=9606 GN=CHD4 PE=1 SV=2	81	22	18	217.9	15	1912	5.86	4	4	8	3	7	5	4	4	8	3	7	5
High	Q5T5P2	Sickle tail protein homolog OS=Homo sapiens OX=9606 GN=KIAA1217 PE=1 SV=2	80	28	28	214	17	1943	7.06	5	8	13	1	4	2	5	8	13	1	4	2
High	P29401	Transketolase OS=Homo sapiens OX=9606 GN=TKT PE=1 SV=3	80	16	16	67.8	33	623	7.66	14	12	10	7	13	8	14	10	10	6	8	7
High	Q8TE68	Epidermal growth factor receptor kinase substrate 8-like protein 1 OS=Homo sapiens OX=9606 GN=EPS8L1 PE=1 SV=3	80	16	16	80.2	25	723	6.04	8	9	6	4	8	9	8	9	6	4	7	9
High	Q96TA1	Protein Niban 2 OS=Homo sapiens OX=9606 GN=NIBAN2 PE=1 SV=3	80	16	16	84.1	27	746	6.19	11	8	10	7	7	8	11	8	10	7	6	8
High	Q3SX14	TREMBL:Q3SX14 (Bos taurus) Similar to Gelsolin	80	14	1	85.6	18	781	6.21	11	11	13	3	9	5	9	9	9	3	6	5
High	Q99816	Tumor susceptibility gene 101 protein OS=Homo sapiens OX=9606 GN=TSG101 PE=1 SV=2	80	13	13	43.9	33	390	6.46	6	8	9	6	8	8	6	8	8	6	8	8
High	P61353	60S ribosomal protein L27 OS=Homo sapiens OX=9606 GN=RPL27 PE=1 SV=2	79	6	6	15.8	43	136	10.56	6	6	8	7	11	9	4	4	4	5	5	6
High	P16402	Histone H1.3 OS=Homo sapiens OX=9606 GN=H1-3 PE=1 SV=2	79	5	5	22.3	15	221	11.02	8	7	8	11	8	8	3	2	2	5	5	3
High	P63096	Guanine nucleotide-binding protein G(i) subunit alpha-1 OS=Homo sapiens OX=9606 GN=GNAI1 PE=1 SV=2	79	10	4	40.3	32	354	5.97	8	7	8	6	7	6	6	5	7	5	6	5
High	O75116	Rho-associated protein kinase 2 OS=Homo sapiens OX=9606 GN=ROCK2 PE=1 SV=4	78	24	21	160.8	21	1388	6.02	4	6	4	7	12	8	4	6	4	7	12	8
High	Q5JWF2	Guanine nucleotide-binding protein G(s) subunit alpha isoforms XLas OS=Homo sapiens OX=9606 GN=GNAS PE=1 SV=2	78	11	10	111	14	1037	5.03	10	8	9	5	7	6	10	8	9	5	7	6
High	P62136	Serine/threonine-protein phosphatase PP1-alpha catalytic subunit OS=Homo sapiens OX=9606 GN=PPP1CA PE=1 SV=1	78	11	4	37.5	42	330	6.33	12	9	8	6	5	5	9	8	7	6	5	5
High	Q9NS86	LanC-like protein 2 OS=Homo sapiens OX=9606 GN=LANCL2 PE=1 SV=1	78	11	11	50.8	32	450	7.43	8	9	7	8	7	7	6	8	7	7	6	6
High	Q8WWM7	Ataxin-2-like protein OS=Homo sapiens OX=9606 GN=ATXN2L PE=1 SV=2	78	16	16	113.3	22	1075	8.59	3	3	6	9	11	7	3	3	5	9	11	7
High	P05455	Lupus La protein OS=Homo sapiens OX=9606 GN=SSB PE=1 SV=2	78	16	16	46.8	33	408	7.12	9	6	8	7	9	5	9	6	8	7	9	5
High	Q6ZRV2	Protein FAM83H OS=Homo sapiens OX=9606 GN=FAM83H PE=1 SV=3	78	27	27	127	33	1179	6.98	17	21	16	2	3	1	17	20	16	1	3	1
High	Q08380	Galectin-3-binding protein OS=Homo sapiens OX=9606 GN=LGALS3BP PE=1 SV=1	78	15	15	65.3	36	585	5.27	12	9	7	3	6	5	11	9	6	3	5	5
High	Q9Y383	Putative RNA-binding protein Luc7-like 2 OS=Homo sapiens OX=9606 GN=LUC7L2 PE=1 SV=2	77	12	8	46.5	32	392	10.01	6	6	5	10	10	9	5	5	5	9	9	8
High	P98160	Basement membrane-specific heparan sulfate proteoglycan core protein OS=Homo sapiens OX=9606 GN=HSPG2 PE=1 SV=4	77	23	23	468.5	7	4391	6.51	7	9	10	1	4	3	7	9	10	1	4	3
High	P07910	Heterogeneous nuclear ribonucleoproteins C1/C2 OS=Homo sapiens OX=9606 GN=HNRNPC PE=1 SV=4	77	8	3	33.7	25	306	5.08	9	9	10	7	7	8	8	7	7	6	6	6
High	P14174	Macrophage migration inhibitory factor OS=Homo sapiens OX=9606 GN=MIF PE=1 SV=4	76	3	3	12.5	37	115	7.88	12	14	7	2	3	2	3	3	2	2	2	2
High	Q8NB78	Lysine-specific histone demethylase 1B OS=Homo sapiens OX=9606 GN=KDM1B PE=1 SV=3	76	20	20	92	30	822	7.87				14	9	14				14	9	14
High	Q05397	Focal adhesion kinase 1 OS=Homo sapiens OX=9606 GN=PTK2 PE=1 SV=2	76	19	19	119.2	22	1052	6.62	8	7	7	10	7	7	7	7	7	9	7	7
High	Q96AB3	Isochorismatase domain-containing protein 2 OS=Homo sapiens OX=9606 GN=ISOC2 PE=1 SV=1	76	6	6	22.3	52	205	7.77	9	9	7	2	1	2	6	5	6	2	1	2
High	P35637	RNA-binding protein FUS OS=Homo sapiens OX=9606 GN=FUS PE=1 SV=1	76	8	6	53.4	22	526	9.36	11	10	12	6	9	6	6	6	7	5	4	4
High	Q9NQW6	Anillin OS=Homo sapiens OX=9606 GN=ANLN PE=1 SV=2	76	21	21	124.1	23	1124	8.07	2	4	8	6	11	5	2	4	8	6	11	5
High	P53396	ATP-citrate synthase OS=Homo sapiens OX=9606 GN=ACLY PE=1 SV=3	76	24	24	120.8	26	1101	7.33	6	5	3	5	8	3	6	5	3	5	8	3
High	P78347	General transcription factor II-I OS=Homo sapiens OX=9606 GN=GTF2I PE=1 SV=2	76	24	24	112.3	26	998	6.39	5	4	6	3	6	4	5	4	6	3	6	4
High	Q96EK4	THAP domain-containing protein 11 OS=Homo sapiens OX=9606 GN=THAP11 PE=1 SV=2	76	6	6	34.4	19	314	8.98				11	13	13				5	6	6
High	P60981	Destrin OS=Homo sapiens OX=9606 GN=DSTN PE=1 SV=3	76	7	7	18.5	36	165	7.85	11	9	9	5	5	4	6	6	6	3	4	3
High	P62906	60S ribosomal protein L10a OS=Homo sapiens OX=9606 GN=RPL10A PE=1 SV=2	75	7	7	24.8	33	217	9.94	6	6	8	8	10	8	6	6	6	6	6	6
High	A0A075B6R9	Probable non-functional immunoglobulin kappa variable 2D-24 OS=Homo sapiens OX=9606 GN=IGKV2D-24 PE=1 SV=1	75	3	2	13.1	13	120	8.87	8	10	7	6	9	3	2	2	1	1	2	1
High	Q14573	Inositol 1,4,5-trisphosphate receptor type 3 OS=Homo sapiens OX=9606 GN=ITPR3 PE=1 SV=2	75	28	28	303.9	12	2671	6.48	6	5	5	2	3	2	6	5	5	2	3	2
High	P49756	RNA-binding protein 25 OS=Homo sapiens OX=9606 GN=RBM25 PE=1 SV=3	75	16	16	100.1	23	843	6.32	2	5	5	8	8	7	2	5	5	7	8	7
High	Q9NZB2	Constitutive coactivator of PPAR-gamma-like protein 1 OS=Homo sapiens OX=9606 GN=FAM120A PE=1 SV=2	75	18	18	121.8	22	1118	8.88	7	4	7	9	6	7	7	4	6	8	6	7
High	Q5SSJ5	Heterochromatin protein 1-binding protein 3 OS=Homo sapiens OX=9606 GN=HP1BP3 PE=1 SV=1	75	15	15	61.2	28	553	9.67	5	5	5	9	8	9	5	5	5	9	8	9
High	P35555	Fibrillin-1 OS=Homo sapiens OX=9606 GN=FBN1 PE=1 SV=4	74	26	25	312.1	11	2871	4.93				22	27	24				20	22	21
High	P45880	Voltage-dependent anion-selective channel protein 2 OS=Homo sapiens OX=9606 GN=VDAC2 PE=1 SV=2	74	11	11	31.5	50	294	7.56	9	8	10	5	7	5	9	8	9	5	6	5
High	P55011	Solute carrier family 12 member 2 OS=Homo sapiens OX=9606 GN=SLC12A2 PE=1 SV=1	74	18	18	131.4	19	1212	6.4	7	11	9	5	6	4	6	9	8	5	6	4
High	P40227	T-complex protein 1 subunit zeta OS=Homo sapiens OX=9606 GN=CCT6A PE=1 SV=3	74	15	11	58	29	531	6.68	10	11	9	2	6	4	9	10	9	2	6	4
High	Q9ULC5	Long-chain-fatty-acid--CoA ligase 5 OS=Homo sapiens OX=9606 GN=ACSL5 PE=1 SV=1	74	19	19	75.9	36	683	6.92	8	10	10	1	5	4	8	9	10	1	5	4
High	Q9BS26	Endoplasmic reticulum resident protein 44 OS=Homo sapiens OX=9606 GN=ERP44 PE=1 SV=1	74	11	11	46.9	28	406	5.26	4	4	4	9	12	7	4	4	4	7	9	6
High	Q96KR1	Zinc finger RNA-binding protein OS=Homo sapiens OX=9606 GN=ZFR PE=1 SV=2	74	20	20	116.9	24	1074	9.04	1	1	1	9	10	8	1	1	1	9	10	8
High	P61158	Actin-related protein 3 OS=Homo sapiens OX=9606 GN=ACTR3 PE=1 SV=3	74	14	12	47.3	46	418	5.88	11	10	10	4	6	6	11	10	10	4	6	6
High	P15531	Nucleoside diphosphate kinase A OS=Homo sapiens OX=9606 GN=NME1 PE=1 SV=1	73	7	3	17.1	53	152	6.19	7	7	9	9	7	8	5	5	4	4	4	4
High	P28288	ATP-binding cassette sub-family D member 3 OS=Homo sapiens OX=9606 GN=ABCD3 PE=1 SV=1	73	18	18	75.4	30	659	9.36	20	19	18	1		1	15	16	15	1		1
High	Q6NXG1	Epithelial splicing regulatory protein 1 OS=Homo sapiens OX=9606 GN=ESRP1 PE=1 SV=2	73	13	11	75.5	30	681	6.68	6	7	6	5	6	6	6	7	5	5	5	6
High	P62913	60S ribosomal protein L11 OS=Homo sapiens OX=9606 GN=RPL11 PE=1 SV=2	73	5	5	20.2	34	178	9.6	11	11	6	7	9	4	5	5	3	5	3	3
High	P62244	40S ribosomal protein S15a OS=Homo sapiens OX=9606 GN=RPS15A PE=1 SV=2	73	6	6	14.8	42	130	10.13	9	10	7	7	8	6	6	6	5	5	4	4
High	P50914	60S ribosomal protein L14 OS=Homo sapiens OX=9606 GN=RPL14 PE=1 SV=4	72	5	5	23.4	27	215	10.93	3	3	3	8	8	9	3	3	2	5	5	5
High	Q5TEC6	Histone H3-7 OS=Homo sapiens OX=9606 GN=H3-7 PE=1 SV=1	72	3	1	15.4	20	136	11.27	8	7	13	9	6	10	1	1	3	2	3	2
High	P54886	Delta-1-pyrroline-5-carboxylate synthase OS=Homo sapiens OX=9606 GN=ALDH18A1 PE=1 SV=2	72	16	16	87.2	24	795	7.12	11	13	13	2	2	2	11	13	12	2	2	2
High	Q14257	Reticulocalbin-2 OS=Homo sapiens OX=9606 GN=RCN2 PE=1 SV=1	72	13	13	36.9	45	317	4.4	13	14	17	1	2	1	12	11	12	1	2	1
High	Q9NUQ9	CYFIP-related Rac1 interactor B OS=Homo sapiens OX=9606 GN=CYRIB PE=1 SV=1	72	12	12	36.7	52	324	6.06	10	12	11	2	4	3	8	10	8	2	4	3
High	P15880	40S ribosomal protein S2 OS=Homo sapiens OX=9606 GN=RPS2 PE=1 SV=2	72	9	9	31.3	34	293	10.24	9	8	7	2	5	3	7	6	6	2	5	3
High	P12004	Proliferating cell nuclear antigen OS=Homo sapiens OX=9606 GN=PCNA PE=1 SV=1	72	11	11	28.8	50	261	4.69	10	11	9	6	3	6	8	9	8	6	3	6
High	P18754	Regulator of chromosome condensation OS=Homo sapiens OX=9606 GN=RCC1 PE=1 SV=1	71	14	14	44.9	45	421	7.52	2	2	4	4	5	3	2	2	3	4	5	3
High	Q63HN8	E3 ubiquitin-protein ligase RNF213 OS=Homo sapiens OX=9606 GN=RNF213 PE=1 SV=3	71	23	23	591	5	5207	6.48	14	15	11	2	7	4	14	15	10	2	6	4
High	P00558	Phosphoglycerate kinase 1 OS=Homo sapiens OX=9606 GN=PGK1 PE=1 SV=3	71	13	13	44.6	41	417	8.1	9	9	10	4	4	4	8	8	9	4	4	4
High	P63241	Eukaryotic translation initiation factor 5A-1 OS=Homo sapiens OX=9606 GN=EIF5A PE=1 SV=2	71	10	10	16.8	56	154	5.24	9	9	6	4	10	4	7	8	6	4	6	4
High	P46781	40S ribosomal protein S9 OS=Homo sapiens OX=9606 GN=RPS9 PE=1 SV=3	71	10	10	22.6	43	194	10.65	8	9	8	5	8	5	8	8	8	5	8	5
High	Q14240	Eukaryotic initiation factor 4A-II OS=Homo sapiens OX=9606 GN=EIF4A2 PE=1 SV=2	71	10	2	46.4	26	407	5.48	8	8	10	7	6	7	7	7	9	7	6	7
High	P42166	Lamina-associated polypeptide 2, isoform alpha OS=Homo sapiens OX=9606 GN=TMPO PE=1 SV=2	71	16	11	75.4	34	694	7.66	8	8	12	4	4	4	7	7	10	4	4	4
High	Q96HS1	Serine/threonine-protein phosphatase PGAM5, mitochondrial OS=Homo sapiens OX=9606 GN=PGAM5 PE=1 SV=2	71	12	12	32	43	289	8.68	10	10	10	6	6	6	9	10	9	6	6	6
High	P22392	Nucleoside diphosphate kinase B OS=Homo sapiens OX=9606 GN=NME2 PE=1 SV=1	71	7	3	17.3	53	152	8.41	6	6	11	9	5	8	5	5	5	5	3	5
High	P62879	Guanine nucleotide-binding protein G(I)/G(S)/G(T) subunit beta-2 OS=Homo sapiens OX=9606 GN=GNB2 PE=1 SV=3	71	11	5	37.3	46	340	6	11	11	12	5	5	4	10	10	9	5	5	4
High	P18085	ADP-ribosylation factor 4 OS=Homo sapiens OX=9606 GN=ARF4 PE=1 SV=3	70	8	6	20.5	53	180	7.14	9	12	10	5	5	5	6	8	7	5	5	5
High	Q92878	DNA repair protein RAD50 OS=Homo sapiens OX=9606 GN=RAD50 PE=1 SV=1	70	24	24	153.8	19	1312	6.89	7	5	7	2	6	5	7	5	7	2	6	5
High	Q9Y266	Nuclear migration protein nudC OS=Homo sapiens OX=9606 GN=NUDC PE=1 SV=1	70	11	11	38.2	36	331	5.38	7	6	9	6	7	9	7	4	7	5	6	7
High	Q9UQ35	Serine/arginine repetitive matrix protein 2 OS=Homo sapiens OX=9606 GN=SRRM2 PE=1 SV=2	70	19	19	299.4	11	2752	12.06	3	3	5	9	10	8	3	3	5	9	10	8
High	Q12797	Aspartyl/asparaginyl beta-hydroxylase OS=Homo sapiens OX=9606 GN=ASPH PE=1 SV=3	70	16	16	85.8	26	758	5.01	4	4	5	7	8	5	4	4	4	7	8	5
High	P50454	Serpin H1 OS=Homo sapiens OX=9606 GN=SERPINH1 PE=1 SV=2	70	14	14	46.4	37	418	8.69	9	8	11	4	5	4	8	7	9	3	4	3
High	P26641	Elongation factor 1-gamma OS=Homo sapiens OX=9606 GN=EEF1G PE=1 SV=3	69	15	15	50.1	37	437	6.67	10	10	9	5	7	3	9	9	9	5	7	3
High	Q9BYK8	Helicase with zinc finger domain 2 OS=Homo sapiens OX=9606 GN=HELZ2 PE=1 SV=6	69	25	25	294.5	11	2649	7.49	3	3	1	13	10	15	3	3	1	12	10	15
High	O95831	Apoptosis-inducing factor 1, mitochondrial OS=Homo sapiens OX=9606 GN=AIFM1 PE=1 SV=1	69	12	12	66.9	25	613	8.95	8	9	9	4	7	3	8	9	9	4	7	3
High	P23921	Ribonucleoside-diphosphate reductase large subunit OS=Homo sapiens OX=9606 GN=RRM1 PE=1 SV=1	69	16	16	90	23	792	7.15	7	7	5	9	10	6	7	7	5	9	10	6
High	O94905	Erlin-2 OS=Homo sapiens OX=9606 GN=ERLIN2 PE=1 SV=1	69	12	9	37.8	44	339	5.62	10	11	8	4	3	3	9	10	7	4	3	3
High	Q9NW13	RNA-binding protein 28 OS=Homo sapiens OX=9606 GN=RBM28 PE=1 SV=3	69	13	13	85.7	18	759	9.22	3	3	5	8	8	9	3	3	5	8	8	9
High	P61313	60S ribosomal protein L15 OS=Homo sapiens OX=9606 GN=RPL15 PE=1 SV=2	69	8	8	24.1	39	204	11.62	6	5	5	5	8	6	6	5	4	3	6	4
High	P05387	60S acidic ribosomal protein P2 OS=Homo sapiens OX=9606 GN=RPLP2 PE=1 SV=1	69	9	8	11.7	93	115	4.54	5	5	5	4	9	6	5	5	5	4	7	4
High	Q99569	Plakophilin-4 OS=Homo sapiens OX=9606 GN=PKP4 PE=1 SV=2	68	20	20	131.8	24	1192	8.94	6	6	11	1	1	2	6	6	10	1	1	2
High	Q9H444	Charged multivesicular body protein 4b OS=Homo sapiens OX=9606 GN=CHMP4B PE=1 SV=1	68	9	9	24.9	47	224	4.82	5	8	8	3	3	3	5	8	8	3	3	3
High	P35914	Hydroxymethylglutaryl-CoA lyase, mitochondrial OS=Homo sapiens OX=9606 GN=HMGCL PE=1 SV=2	68	10	10	34.3	36	325	8.54	5	6	7	6	6	6	5	6	7	6	6	6
High	P35998	26S proteasome regulatory subunit 7 OS=Homo sapiens OX=9606 GN=PSMC2 PE=1 SV=3	68	17	17	48.6	44	433	5.95	2	3	2	11	11	11	2	3	2	10	11	10
High	P36957	Dihydrolipoyllysine-residue succinyltransferase component of 2-oxoglutarate dehydrogenase complex, mitochondrial OS=Homo sapiens OX=9606 GN=DLST PE=1 SV=4	68	10	10	48.7	28	453	8.95	6	7	9	6	4	3	6	6	8	5	3	3
High	O00148	ATP-dependent RNA helicase DDX39A OS=Homo sapiens OX=9606 GN=DDX39A PE=1 SV=2	68	12	4	49.1	34	427	5.68	10	8	13	5	6	4	9	8	11	4	6	4
High	P09543	2',3'-cyclic-nucleotide 3'-phosphodiesterase OS=Homo sapiens OX=9606 GN=CNP PE=1 SV=2	68	15	15	47.5	34	421	9.07	5	5	9	7	6	9	5	5	8	7	6	9
High	O15438	ATP-binding cassette sub-family C member 3 OS=Homo sapiens OX=9606 GN=ABCC3 PE=1 SV=3	68	22	20	169.2	19	1527	7.2	17	20	18			1	14	17	15			1
High	Q8N1G4	Leucine-rich repeat-containing protein 47 OS=Homo sapiens OX=9606 GN=LRRC47 PE=1 SV=1	68	14	14	63.4	30	583	8.28	7	5	8	6	6	4	7	5	8	6	6	4
High	Q9Y2X3	Nucleolar protein 58 OS=Homo sapiens OX=9606 GN=NOP58 PE=1 SV=1	67	13	13	59.5	31	529	8.92	3	4	7	5	6	6	3	4	7	5	6	6
High	Q15046	Lysine--tRNA ligase OS=Homo sapiens OX=9606 GN=KARS1 PE=1 SV=3	67	13	13	68	25	597	6.35	10	4	8	5	5	5	10	4	7	5	5	5
High	Q13263	Transcription intermediary factor 1-beta OS=Homo sapiens OX=9606 GN=TRIM28 PE=1 SV=5	67	13	13	88.5	26	835	5.77	5	5	8	6	5	6	5	5	8	6	5	6
High	P51114	Fragile X mental retardation syndrome-related protein 1 OS=Homo sapiens OX=9606 GN=FXR1 PE=1 SV=3	67	17	15	69.7	36	621	6.15	6	7	4	8	8	7	6	7	4	7	7	6
High	O43837	Isocitrate dehydrogenase [NAD] subunit beta, mitochondrial OS=Homo sapiens OX=9606 GN=IDH3B PE=1 SV=2	67	14	14	42.2	48	385	8.46	7	8	7	5	6	6	7	8	7	5	6	6
High	P60903	Protein S100-A10 OS=Homo sapiens OX=9606 GN=S100A10 PE=1 SV=2	67	3	3	11.2	18	97	7.37	5	3	5	3	5	4	2	1	2	3	3	3
High	Q6UXN9	WD repeat-containing protein 82 OS=Homo sapiens OX=9606 GN=WDR82 PE=1 SV=1	67	11	11	35.1	35	313	7.69	1	1	1	10	12	11	1	1	1	8	8	9
High	P61204	ADP-ribosylation factor 3 OS=Homo sapiens OX=9606 GN=ARF3 PE=1 SV=2	66	7	4	20.6	48	181	7.43	9	11	11	4	6	4	7	7	7	4	5	4
High	P52789	Hexokinase-2 OS=Homo sapiens OX=9606 GN=HK2 PE=1 SV=2	66	20	17	102.3	25	917	6.05	7	9	10	1	2	1	7	9	10	1	2	1
High	P15170	Eukaryotic peptide chain release factor GTP-binding subunit ERF3A OS=Homo sapiens OX=9606 GN=GSPT1 PE=1 SV=1	66	15	15	55.7	37	499	5.62	8	7	11	3	2	6	7	7	10	3	2	6
High	Q15084	Protein disulfide-isomerase A6 OS=Homo sapiens OX=9606 GN=PDIA6 PE=1 SV=1	66	8	8	48.1	26	440	5.08	9	9	9	5	5	5	7	7	7	5	5	5
High	O15231	Zinc finger protein 185 OS=Homo sapiens OX=9606 GN=ZNF185 PE=1 SV=3	65	18	18	73.5	35	689	7.01	10	8	9	2	3	4	10	8	9	2	3	4
High	Q6XQN6	Nicotinate phosphoribosyltransferase OS=Homo sapiens OX=9606 GN=NAPRT PE=1 SV=2	65	11	11	57.5	33	538	5.68	6	4	9	6	7	7	6	4	9	6	5	7
High	O60264	SWI/SNF-related matrix-associated actin-dependent regulator of chromatin subfamily A member 5 OS=Homo sapiens OX=9606 GN=SMARCA5 PE=1 SV=1	65	18	18	121.8	18	1052	8.09	6	9	8	8	9	5	6	9	8	8	9	5
High	Q9BVI0	PHD finger protein 20 OS=Homo sapiens OX=9606 GN=PHF20 PE=1 SV=2	65	18	18	115.3	23	1012	6.99				9	10	10				9	10	10
High	Q14697	Neutral alpha-glucosidase AB OS=Homo sapiens OX=9606 GN=GANAB PE=1 SV=3	65	20	20	106.8	25	944	6.14	8	12	11	2	2	4	8	12	11	2	2	4
High	P62829	60S ribosomal protein L23 OS=Homo sapiens OX=9606 GN=RPL23 PE=1 SV=1	65	5	5	14.9	44	140	10.51	4	7	3	4	7	5	3	4	3	3	5	4
High	P36873	Serine/threonine-protein phosphatase PP1-gamma catalytic subunit OS=Homo sapiens OX=9606 GN=PPP1CC PE=1 SV=1	65	8	1	37	31	323	6.54	9	8	7	4	3	3	6	7	6	4	3	3
High	P49589	Cysteine--tRNA ligase, cytoplasmic OS=Homo sapiens OX=9606 GN=CARS1 PE=1 SV=3	65	14	14	85.4	21	748	6.76	5	5	5	7	6	4	5	5	5	6	6	4
High	P35222	Catenin beta-1 OS=Homo sapiens OX=9606 GN=CTNNB1 PE=1 SV=1	65	13	9	85.4	18	781	5.86	10	9	8	2	3	2	8	9	8	2	3	2
High	Q9UQE7	Structural maintenance of chromosomes protein 3 OS=Homo sapiens OX=9606 GN=SMC3 PE=1 SV=2	65	22	22	141.5	22	1217	7.18	6	4	9	2	6	3	6	4	9	2	6	3
High	P30050	60S ribosomal protein L12 OS=Homo sapiens OX=9606 GN=RPL12 PE=1 SV=1	64	5	5	17.8	45	165	9.42	5	5	5	5	8	5	5	5	5	5	5	5
High	O75534	Cold shock domain-containing protein E1 OS=Homo sapiens OX=9606 GN=CSDE1 PE=1 SV=2	64	16	16	88.8	21	798	6.25	3	2	3	8	8	11	3	2	3	8	8	11
High	P35813	Protein phosphatase 1A OS=Homo sapiens OX=9606 GN=PPM1A PE=1 SV=1	64	7	4	42.4	23	382	5.36	6	8	7	6	5	7	4	4	6	3	2	4
High	P62873	Guanine nucleotide-binding protein G(I)/G(S)/G(T) subunit beta-1 OS=Homo sapiens OX=9606 GN=GNB1 PE=1 SV=3	64	11	5	37.4	40	340	6	9	8	8	6	4	5	9	8	7	6	4	5
High	P62888	60S ribosomal protein L30 OS=Homo sapiens OX=9606 GN=RPL30 PE=1 SV=2	64	5	5	12.8	57	115	9.63	5	3	6	5	7	4	4	3	4	5	4	4
High	Q13247	Serine/arginine-rich splicing factor 6 OS=Homo sapiens OX=9606 GN=SRSF6 PE=1 SV=2	64	9	8	39.6	23	344	11.43	7	5	4	13	6	7	7	5	4	9	5	6
High	P24752	Acetyl-CoA acetyltransferase, mitochondrial OS=Homo sapiens OX=9606 GN=ACAT1 PE=1 SV=1	64	12	12	45.2	30	427	8.85	2	4	5	8	7	7	2	4	5	8	7	7
High	P11166	Solute carrier family 2, facilitated glucose transporter member 1 OS=Homo sapiens OX=9606 GN=SLC2A1 PE=1 SV=2	64	7	7	54	12	492	8.72	10	10	11	2	4	5	6	4	6	2	3	4
High	P23284	Peptidyl-prolyl cis-trans isomerase B OS=Homo sapiens OX=9606 GN=PPIB PE=1 SV=2	64	12	12	23.7	50	216	9.41	8	7	7	9	9	8	8	7	7	8	8	8
High	Q09028	Histone-binding protein RBBP4 OS=Homo sapiens OX=9606 GN=RBBP4 PE=1 SV=3	64	9	4	47.6	22	425	4.89	4	3	6	9	8	8	4	3	5	7	7	7
High	P04424	Argininosuccinate lyase OS=Homo sapiens OX=9606 GN=ASL PE=1 SV=4	64	14	14	51.6	35	464	6.48	6	6	5	4	5	4	6	6	5	4	5	4
High	Q99543	DnaJ homolog subfamily C member 2 OS=Homo sapiens OX=9606 GN=DNAJC2 PE=1 SV=4	63	14	14	72	24	621	8.7	4	6	5	5	5	8	4	6	5	5	5	8
High	P17655	Calpain-2 catalytic subunit OS=Homo sapiens OX=9606 GN=CAPN2 PE=1 SV=6	63	14	14	79.9	28	700	4.98	7	6	4	7	3	6	7	6	4	7	3	6
High	P04080	Cystatin-B OS=Homo sapiens OX=9606 GN=CSTB PE=1 SV=2	63	5	5	11.1	77	98	7.56	5	7	8	4	8	5	4	5	4	3	4	3
High	P62263	40S ribosomal protein S14 OS=Homo sapiens OX=9606 GN=RPS14 PE=1 SV=3	63	6	6	16.3	38	151	10.05	6	5	7	9	7	8	4	4	5	5	5	5
High	P62993	Growth factor receptor-bound protein 2 OS=Homo sapiens OX=9606 GN=GRB2 PE=1 SV=1	63	12	12	25.2	61	217	6.32	7	6	10	6	6	6	6	6	8	6	6	6
High	Q96C19	EF-hand domain-containing protein D2 OS=Homo sapiens OX=9606 GN=EFHD2 PE=1 SV=1	63	11	11	26.7	38	240	5.2	8	10	9	5	4	4	8	9	8	5	4	4
High	Q14258	E3 ubiquitin/ISG15 ligase TRIM25 OS=Homo sapiens OX=9606 GN=TRIM25 PE=1 SV=2	63	13	13	70.9	29	630	8.09	10	12	7	4	4	4	9	11	7	4	3	4
High	P09496	Clathrin light chain A OS=Homo sapiens OX=9606 GN=CLTA PE=1 SV=1	63	7	7	27.1	20	248	4.51	7	7	7	4	6	6	6	6	5	4	6	6
High	P11388	DNA topoisomerase 2-alpha OS=Homo sapiens OX=9606 GN=TOP2A PE=1 SV=3	62	16	8	174.3	11	1531	8.72	6	12	12	3	6	3	6	12	10	3	5	3
High	Q04837	Single-stranded DNA-binding protein, mitochondrial OS=Homo sapiens OX=9606 GN=SSBP1 PE=1 SV=1	62	7	7	17.2	52	148	9.6	10	8	8	6	8	6	7	6	7	5	5	5
High	Q9NUQ6	SPATS2-like protein OS=Homo sapiens OX=9606 GN=SPATS2L PE=1 SV=2	62	12	12	61.7	28	558	9.64	4	4	3	6	9	8	4	4	3	6	8	7
High	Q9Y520	Protein PRRC2C OS=Homo sapiens OX=9606 GN=PRRC2C PE=1 SV=4	62	19	19	316.7	8	2896	9.13		1	1	7	9	8		1	1	7	9	8
High	Q99873	Protein arginine N-methyltransferase 1 OS=Homo sapiens OX=9606 GN=PRMT1 PE=1 SV=3	62	10	10	42.4	33	371	5.35	4	4	8	6	6	7	4	4	8	6	6	7
High	Q13596	Sorting nexin-1 OS=Homo sapiens OX=9606 GN=SNX1 PE=1 SV=3	62	12	10	59	27	522	5.15	5	3	6	6	9	8	5	3	6	6	9	7
High	Q96EZ8	Microspherule protein 1 OS=Homo sapiens OX=9606 GN=MCRS1 PE=1 SV=1	62	15	15	51.8	39	462	9.38				9	10	7				9	8	7
High	Q9H7Z6	Histone acetyltransferase KAT8 OS=Homo sapiens OX=9606 GN=KAT8 PE=1 SV=2	62	13	12	52.4	32	458	8.27				6	12	8				6	11	7
High	Q13435	Splicing factor 3B subunit 2 OS=Homo sapiens OX=9606 GN=SF3B2 PE=1 SV=2	62	16	16	100.2	22	895	5.67	2	3	2	5	9	5	2	3	2	5	9	5
High	Q99439	Calponin-2 OS=Homo sapiens OX=9606 GN=CNN2 PE=1 SV=4	62	11	11	33.7	54	309	7.33	6	5	7	5	6	6	5	5	5	5	6	6
High	Q1KMD3	Heterogeneous nuclear ribonucleoprotein U-like protein 2 OS=Homo sapiens OX=9606 GN=HNRNPUL2 PE=1 SV=1	62	13	13	85.1	19	747	4.91	8	7	9	4	5	5	8	7	9	4	5	5
High	P61081	NEDD8-conjugating enzyme Ubc12 OS=Homo sapiens OX=9606 GN=UBE2M PE=1 SV=1	61	7	7	20.9	33	183	7.69	7	7	8	5	5	7	7	6	7	5	5	7
High	Q7L0Y3	tRNA methyltransferase 10 homolog C OS=Homo sapiens OX=9606 GN=TRMT10C PE=1 SV=2	61	16	16	47.3	41	403	9.36	5	8	5	4	8	3	5	8	5	4	8	3
High	Q8WXF1	Paraspeckle component 1 OS=Homo sapiens OX=9606 GN=PSPC1 PE=1 SV=1	61	13	13	58.7	33	523	6.67	1	1	1	9	11	9	1	1	1	9	11	9
High	Q8TEM1	Nuclear pore membrane glycoprotein 210 OS=Homo sapiens OX=9606 GN=NUP210 PE=1 SV=3	61	18	18	205	12	1887	6.81	3	2	4	3	6	7	3	2	4	3	6	7
High	Q02218	2-oxoglutarate dehydrogenase, mitochondrial OS=Homo sapiens OX=9606 GN=OGDH PE=1 SV=3	61	18	18	115.9	21	1023	6.86	5	5	5	3	2	4	5	5	5	3	2	4
High	P26368	Splicing factor U2AF 65 kDa subunit OS=Homo sapiens OX=9606 GN=U2AF2 PE=1 SV=4	61	8	8	53.5	29	475	9.09	6	4	5	5	6	7	6	4	5	5	4	5
High	Q14103	Heterogeneous nuclear ribonucleoprotein D0 OS=Homo sapiens OX=9606 GN=HNRNPD PE=1 SV=1	61	8	6	38.4	24	355	7.81	8	8	9	4	5	3	7	7	7	3	4	2
High	Q9BSH5	Haloacid dehalogenase-like hydrolase domain-containing protein 3 OS=Homo sapiens OX=9606 GN=HDHD3 PE=1 SV=1	61	8	8	28	45	251	6.71	8	8	9	4	3	4	6	6	7	4	3	4
High	P38919	Eukaryotic initiation factor 4A-III OS=Homo sapiens OX=9606 GN=EIF4A3 PE=1 SV=4	61	13	11	46.8	31	411	6.73	8	9	5	5	8	7	8	9	5	5	8	7
High	Q01167	Forkhead box protein K2 OS=Homo sapiens OX=9606 GN=FOXK2 PE=1 SV=3	61	13	11	69	27	660	9.54				8	12	8				8	11	8
High	Q9UBU9	Nuclear RNA export factor 1 OS=Homo sapiens OX=9606 GN=NXF1 PE=1 SV=1	60	23	23	70.1	44	619	8.51
High	Q16576	Histone-binding protein RBBP7 OS=Homo sapiens OX=9606 GN=RBBP7 PE=1 SV=1	60	10	5	47.8	29	425	5.05	5	4	5	7	6	6	5	4	5	6	5	6
High	P08670	Vimentin OS=Homo sapiens OX=9606 GN=VIM PE=1 SV=4	60	10	6	53.6	20	466	5.12	6	7	7	9	10	8	3	3	3	7	6	7
High	P52948	Nuclear pore complex protein Nup98-Nup96 OS=Homo sapiens OX=9606 GN=NUP98 PE=1 SV=4	60	21	21	197.5	16	1817	6.4	4	2	2	2	1	3	4	2	2	2	1	3
High	P09622	Dihydrolipoyl dehydrogenase, mitochondrial OS=Homo sapiens OX=9606 GN=DLD PE=1 SV=2	60	10	10	54.1	28	509	7.85	10	10	11	3	3	3	8	9	8	3	2	3
High	P26196	Probable ATP-dependent RNA helicase DDX6 OS=Homo sapiens OX=9606 GN=DDX6 PE=1 SV=2	59	11	11	54.4	30	483	8.66	5	5	4	5	7	7	5	5	4	5	7	7
High	Q12888	TP53-binding protein 1 OS=Homo sapiens OX=9606 GN=TP53BP1 PE=1 SV=2	59	20	20	213.4	17	1972	4.7	1	4	4	4	7	6	1	4	4	4	7	6
High	P21964	Catechol O-methyltransferase OS=Homo sapiens OX=9606 GN=COMT PE=1 SV=2	59	11	11	30	61	271	5.47	9	8	7	3	4	3	7	5	6	3	4	2
High	Q86XN7	Proline and serine-rich protein 1 OS=Homo sapiens OX=9606 GN=PROSER1 PE=1 SV=2	59	12	12	95.6	16	944	8.88				11	14	9				8	10	8
High	P62753	40S ribosomal protein S6 OS=Homo sapiens OX=9606 GN=RPS6 PE=1 SV=1	59	6	6	28.7	20	249	10.84	5	4	3	6	8	6	4	4	3	4	4	5
High	A5YKK6	CCR4-NOT transcription complex subunit 1 OS=Homo sapiens OX=9606 GN=CNOT1 PE=1 SV=2	59	21	21	266.8	11	2376	7.11	3	5	2	4	5	4	3	5	2	4	5	4
High	Q92900	Regulator of nonsense transcripts 1 OS=Homo sapiens OX=9606 GN=UPF1 PE=1 SV=2	59	13	13	124.3	12	1129	6.61	3	5	4	9	10	9	3	5	4	8	10	9
High	P09497	Clathrin light chain B OS=Homo sapiens OX=9606 GN=CLTB PE=1 SV=1	59	10	10	25.2	28	229	4.64	5	5	5	6	7	7	5	5	5	6	7	7
High	Q9Y5K6	CD2-associated protein OS=Homo sapiens OX=9606 GN=CD2AP PE=1 SV=1	59	15	15	71.4	29	639	6.4	5	6	4	2	5	3	5	6	4	2	4	3
High	Q5JRX3	Presequence protease, mitochondrial OS=Homo sapiens OX=9606 GN=PITRM1 PE=1 SV=3	59	17	17	117.3	21	1037	6.92	5	5	4	5	6	6	5	5	4	4	5	6
High	Q8WVV4	Protein POF1B OS=Homo sapiens OX=9606 GN=POF1B PE=1 SV=3	59	15	15	68	33	589	6.32	9	7	8	3	4	3	9	7	8	3	4	3
High	O43592	Exportin-T OS=Homo sapiens OX=9606 GN=XPOT PE=1 SV=2	59	19	19	109.9	25	962	5.39	15	14	17		2		15	14	16		2
High	Q9NS37	CREB/ATF bZIP transcription factor OS=Homo sapiens OX=9606 GN=CREBZF PE=1 SV=2	59	14	14	37.1	44	354	5.24				8	5	8				8	5	8
High	Q9BVP2	Guanine nucleotide-binding protein-like 3 OS=Homo sapiens OX=9606 GN=GNL3 PE=1 SV=2	58	14	13	62	27	549	9.16	2	6	3	5	6	6	2	4	2	4	6	6
High	Q99567	Nuclear pore complex protein Nup88 OS=Homo sapiens OX=9606 GN=NUP88 PE=1 SV=2	58	14	14	83.5	27	741	5.69	2	1	3	5	7	4	2	1	3	5	7	4
High	Q3SX09	TREMBL:Q3SX09 (Bos taurus) similar to HBG protein	58	9	9	22	45	201	9.39	5	6	4	9	10	9	5	5	4	5	7	4
High	Q9UE12	TREMBL:Q9UE12 Type I hair keratin 1 - Homo sapiens (Human).	58	3	1	47.2	6	416	4.88	8	9	12	5	8	4	2	2	2	2	2	2
High	Q04637	Eukaryotic translation initiation factor 4 gamma 1 OS=Homo sapiens OX=9606 GN=EIF4G1 PE=1 SV=4	58	18	15	175.4	13	1599	5.33	2	4	4	4	7	5	2	4	4	4	7	5
High	O95861	3'(2'),5'-bisphosphate nucleotidase 1 OS=Homo sapiens OX=9606 GN=BPNT1 PE=1 SV=1	58	11	11	33.4	50	308	5.69	3	1	3	6	6	6	3	1	3	6	5	6
High	P62917	60S ribosomal protein L8 OS=Homo sapiens OX=9606 GN=RPL8 PE=1 SV=2	58	7	7	28	41	257	11.03	5	5	5	5	6	6	4	5	5	5	4	5
High	P26038	Moesin OS=Homo sapiens OX=9606 GN=MSN PE=1 SV=3	58	12	8	67.8	19	577	6.4	4	6	10	4	6	3	4	6	9	4	6	2
High	P30048	Thioredoxin-dependent peroxide reductase, mitochondrial OS=Homo sapiens OX=9606 GN=PRDX3 PE=1 SV=3	58	7	7	27.7	36	256	7.78	6	6	7	6	3	5	6	5	6	5	3	5
High	Q13242	Serine/arginine-rich splicing factor 9 OS=Homo sapiens OX=9606 GN=SRSF9 PE=1 SV=1	58	10	10	25.5	39	221	8.65	5	6	9	6	5	8	5	5	8	5	5	7
High	Q15436	Protein transport protein Sec23A OS=Homo sapiens OX=9606 GN=SEC23A PE=1 SV=2	58	11	8	86.1	18	765	7.08	4	7	10	3	3	4	4	7	10	3	3	4
High	Q9UG63	ATP-binding cassette sub-family F member 2 OS=Homo sapiens OX=9606 GN=ABCF2 PE=1 SV=2	58	13	13	71.2	21	623	7.37	9	7	6	4	5	3	9	7	6	4	5	3
High	Q09161	Nuclear cap-binding protein subunit 1 OS=Homo sapiens OX=9606 GN=NCBP1 PE=1 SV=1	58	13	13	91.8	22	790	6.43	3	4	5	5	8	8	3	4	5	5	8	8
High	P42330	Aldo-keto reductase family 1 member C3 OS=Homo sapiens OX=9606 GN=AKR1C3 PE=1 SV=4	58	10	4	36.8	42	323	7.94	10	11	9	2	3	2	9	9	8	2	3	2
High	Q9Y3F4	Serine-threonine kinase receptor-associated protein OS=Homo sapiens OX=9606 GN=STRAP PE=1 SV=1	58	16	16	38.4	57	350	5.12	2	2	5	7	8	6	2	2	4	7	8	6
High	P51858	Hepatoma-derived growth factor OS=Homo sapiens OX=9606 GN=HDGF PE=1 SV=1	58	13	13	26.8	61	240	4.73	4	5	6	4	6	7	4	5	6	4	6	7
High	P36551	Oxygen-dependent coproporphyrinogen-III oxidase, mitochondrial OS=Homo sapiens OX=9606 GN=CPOX PE=1 SV=3	58	11	11	50.1	29	454	8.25	5	4	6	4	4	4	5	4	6	4	4	4
High	O75400	Pre-mRNA-processing factor 40 homolog A OS=Homo sapiens OX=9606 GN=PRPF40A PE=1 SV=2	58	13	13	108.7	13	957	7.56	2	2	3	9	8	8	2	2	3	9	7	8
High	Q9NZL9	Methionine adenosyltransferase 2 subunit beta OS=Homo sapiens OX=9606 GN=MAT2B PE=1 SV=1	58	10	10	37.5	39	334	7.36	8	9	7	3	6	4	8	9	7	3	5	4
High	P17980	26S proteasome regulatory subunit 6A OS=Homo sapiens OX=9606 GN=PSMC3 PE=1 SV=3	57	11	11	49.2	33	439	5.24	2	2	4	5	8	8	2	2	3	5	7	7
High	P04183	Thymidine kinase, cytosolic OS=Homo sapiens OX=9606 GN=TK1 PE=1 SV=2	57	8	8	25.5	38	234	8.51	2	3	3	5	9	4	2	3	3	5	8	4
High	Q8WUM0	Nuclear pore complex protein Nup133 OS=Homo sapiens OX=9606 GN=NUP133 PE=1 SV=2	57	16	16	128.9	17	1156	5.1	3	5	6	3	3	2	3	5	6	3	3	2
High	O60832	H/ACA ribonucleoprotein complex subunit DKC1 OS=Homo sapiens OX=9606 GN=DKC1 PE=1 SV=3	57	14	14	57.6	29	514	9.42	3	3	5	3	6	4	3	3	5	3	6	4
High	Q12905	Interleukin enhancer-binding factor 2 OS=Homo sapiens OX=9606 GN=ILF2 PE=1 SV=2	57	10	10	43	37	390	5.26	5	4	6	5	4	5	5	4	6	4	3	4
High	P17858	ATP-dependent 6-phosphofructokinase, liver type OS=Homo sapiens OX=9606 GN=PFKL PE=1 SV=6	57	12	7	85	19	780	7.5	6	9	10	2	5	3	5	7	7	2	4	3
High	Q99575	Ribonucleases P/MRP protein subunit POP1 OS=Homo sapiens OX=9606 GN=POP1 PE=1 SV=2	57	17	17	114.6	24	1024	9.22	3	2	2	3	11	4	3	2	2	3	11	4
High	Q9H223	EH domain-containing protein 4 OS=Homo sapiens OX=9606 GN=EHD4 PE=1 SV=1	56	16	15	61.1	32	541	6.76	9	10	10	1		3	9	9	10	1		3
High	O60313	Dynamin-like 120 kDa protein, mitochondrial OS=Homo sapiens OX=9606 GN=OPA1 PE=1 SV=3	56	16	16	111.6	20	960	7.87	3	4	7	1	3	1	3	4	6	1	3	1
High	P18077	60S ribosomal protein L35a OS=Homo sapiens OX=9606 GN=RPL35A PE=1 SV=2	56	6	6	12.5	39	110	11.06	4	3	7	7	6	8	3	2	5	4	4	4
High	O95425	Supervillin OS=Homo sapiens OX=9606 GN=SVIL PE=1 SV=2	56	23	23	247.6	14	2214	6.98	7	10	10		2		7	10	10		2
High	Q13439	Golgin subfamily A member 4 OS=Homo sapiens OX=9606 GN=GOLGA4 PE=1 SV=1	56	27	27	261	13	2230	5.39				7	11	7				7	11	7
High	P08237	ATP-dependent 6-phosphofructokinase, muscle type OS=Homo sapiens OX=9606 GN=PFKM PE=1 SV=2	56	14	11	85.1	19	780	7.99	6	7	9	4	3	3	6	7	9	4	3	3
High	P36542	ATP synthase subunit gamma, mitochondrial OS=Homo sapiens OX=9606 GN=ATP5F1C PE=1 SV=1	56	9	9	33	32	298	9.22	8	9	10	2	4	3	7	8	9	2	4	3
High	Q13838	Spliceosome RNA helicase DDX39B OS=Homo sapiens OX=9606 GN=DDX39B PE=1 SV=1	56	12	4	49	36	428	5.67	5	5	10	5	5	4	5	5	9	4	5	4
High	P46776	60S ribosomal protein L27a OS=Homo sapiens OX=9606 GN=RPL27A PE=1 SV=2	56	5	5	16.6	28	148	11	6	5	7	5	7	5	4	4	5	4	5	5
High	A6NHL2	Tubulin alpha chain-like 3 OS=Homo sapiens OX=9606 GN=TUBAL3 PE=1 SV=2	55	4	1	49.9	9	446	6.05	6	8	6	5	6	5	4	4	4	3	3	3
High	Q9UPV9	Trafficking kinesin-binding protein 1 OS=Homo sapiens OX=9606 GN=TRAK1 PE=1 SV=1	55	15	15	106	21	953	5.85				12	14	12				12	13	12
High	Q99836	Myeloid differentiation primary response protein MyD88 OS=Homo sapiens OX=9606 GN=MYD88 PE=1 SV=1	55	11	11	33.2	43	296	6.15	5	6	4	7	8	4	5	6	4	7	8	4
High	Q92616	eIF-2-alpha kinase activator GCN1 OS=Homo sapiens OX=9606 GN=GCN1 PE=1 SV=7	55	24	24	292.5	11	2671	7.43	5	5	7	1	1		5	5	7	1	1
High	Q9HC35	Echinoderm microtubule-associated protein-like 4 OS=Homo sapiens OX=9606 GN=EML4 PE=1 SV=3	55	16	16	108.8	18	981	6.4	1	4	3	6	4	7	1	4	3	6	4	7
High	Q969S8	Polyamine deacetylase HDAC10 OS=Homo sapiens OX=9606 GN=HDAC10 PE=1 SV=1	55	9	9	71.4	24	669	5.74	6	6	7	3	4	4	6	6	5	3	4	4
High	Q13547	Histone deacetylase 1 OS=Homo sapiens OX=9606 GN=HDAC1 PE=1 SV=1	55	10	6	55.1	29	482	5.48	5	4	7	3	7	6	5	4	7	3	4	5
High	P47897	Glutamine--tRNA ligase OS=Homo sapiens OX=9606 GN=QARS1 PE=1 SV=1	55	15	15	87.7	22	775	7.15	6	6	4	2	6	3	6	6	4	2	5	2
High	P00492	Hypoxanthine-guanine phosphoribosyltransferase OS=Homo sapiens OX=9606 GN=HPRT1 PE=1 SV=2	55	8	8	24.6	52	218	6.68	5	4	7	6	8	6	5	4	6	5	6	6
High	Q96DG6	Carboxymethylenebutenolidase homolog OS=Homo sapiens OX=9606 GN=CMBL PE=1 SV=1	55	8	8	28	29	245	7.18	6	4	5	7	5	5	5	4	4	6	5	5
High	Q9UBL6	Copine-7 OS=Homo sapiens OX=9606 GN=CPNE7 PE=1 SV=1	55	11	10	70.2	21	633	6.38	3	4	4	2	6	4	3	4	4	2	4	4
High	Q9NYF8	Bcl-2-associated transcription factor 1 OS=Homo sapiens OX=9606 GN=BCLAF1 PE=1 SV=2	55	11	10	106.1	18	920	9.98	5	5	3	6	9	4	4	5	3	5	8	4
High	O14979	Heterogeneous nuclear ribonucleoprotein D-like OS=Homo sapiens OX=9606 GN=HNRNPDL PE=1 SV=3	55	8	6	46.4	21	420	9.57	8	9	8	5	4	3	7	8	7	4	2	2
High	Q13555	Calcium/calmodulin-dependent protein kinase type II subunit gamma OS=Homo sapiens OX=9606 GN=CAMK2G PE=1 SV=4	55	13	10	62.6	30	558	7.83	9	7	6	3	4	4	9	7	6	3	4	4
High	P69905	Hemoglobin subunit alpha OS=Homo sapiens OX=9606 GN=HBA1 PE=1 SV=2	54	4	2	15.2	25	142	8.68	6	3	4	10	10	8	3	3	3	4	4	4
High	P52943	Cysteine-rich protein 2 OS=Homo sapiens OX=9606 GN=CRIP2 PE=1 SV=1	54	6	6	22.5	53	208	8.72	5	5	6	6	3	5	5	5	5	3	3	3
High	P16989	Y-box-binding protein 3 OS=Homo sapiens OX=9606 GN=YBX3 PE=1 SV=4	54	6	3	40.1	22	372	9.77	3	3	5	7	5	7	3	3	4	6	4	6
High	P60866	40S ribosomal protein S20 OS=Homo sapiens OX=9606 GN=RPS20 PE=1 SV=1	54	5	5	13.4	29	119	9.94	6	6	5	5	6	5	5	4	4	3	4	3
High	Q9Y490	Talin-1 OS=Homo sapiens OX=9606 GN=TLN1 PE=1 SV=3	54	19	17	269.6	10	2541	6.07	3	2	6	3	4	5	3	2	6	3	4	5
High	P30041	Peroxiredoxin-6 OS=Homo sapiens OX=9606 GN=PRDX6 PE=1 SV=3	54	10	10	25	47	224	6.38	7	6	4	6	4	7	7	6	4	6	4	7
High	Q9UKD2	mRNA turnover protein 4 homolog OS=Homo sapiens OX=9606 GN=MRTO4 PE=1 SV=2	54	12	12	27.5	52	239	8.29	2	3	4	6	4	7	2	3	4	6	4	7
High	Q9P206	Uncharacterized protein KIAA1522 OS=Homo sapiens OX=9606 GN=KIAA1522 PE=1 SV=2	54	16	16	107	22	1035	9.73	7	2	4	3	4	3	7	2	4	3	4	3
High	P49902	Cytosolic purine 5'-nucleotidase OS=Homo sapiens OX=9606 GN=NT5C2 PE=1 SV=1	54	11	11	64.9	21	561	6.14	5	7	5	6	5	6	5	7	5	6	5	6
High	P31153	S-adenosylmethionine synthase isoform type-2 OS=Homo sapiens OX=9606 GN=MAT2A PE=1 SV=1	54	9	9	43.6	28	395	6.48	6	7	5	5	6	5	6	7	5	5	6	5
High	P23588	Eukaryotic translation initiation factor 4B OS=Homo sapiens OX=9606 GN=EIF4B PE=1 SV=2	54	7	7	69.1	13	611	5.73	5	5	7	5	6	4	3	4	5	5	6	4
High	P38117	Electron transfer flavoprotein subunit beta OS=Homo sapiens OX=9606 GN=ETFB PE=1 SV=3	54	10	10	27.8	43	255	8.1	7	9	5	5	3	4	7	9	5	5	3	4
High	P46777	60S ribosomal protein L5 OS=Homo sapiens OX=9606 GN=RPL5 PE=1 SV=3	54	10	10	34.3	38	297	9.72	6	7	5	4	3	4	6	7	5	4	3	4
High	Q8TD06	Anterior gradient protein 3 OS=Homo sapiens OX=9606 GN=AGR3 PE=1 SV=1	54	2	1	19.2	13	166	7.99		1		13	19	14		1		1	1	1
High	Q71UI9	Histone H2A.V OS=Homo sapiens OX=9606 GN=H2AZ2 PE=1 SV=3	53	4	2	13.5	31	128	10.58	6	7	9	6	5	5	4	4	3	2	3	2
High	Q9UKV8	Protein argonaute-2 OS=Homo sapiens OX=9606 GN=AGO2 PE=1 SV=3	53	14	14	97.1	20	859	9.19	2	3	1	6	8	3	2	2	1	6	8	3
High	O15226	NF-kappa-B-repressing factor OS=Homo sapiens OX=9606 GN=NKRF PE=1 SV=2	53	13	13	77.6	21	690	8.79	2	1	3	6	8	7	2	1	3	6	8	7
High	O75477	Erlin-1 OS=Homo sapiens OX=9606 GN=ERLIN1 PE=1 SV=2	53	9	6	39.1	27	348	7.87	5	7	7	3	2	2	5	6	6	3	2	2
High	Q16629	Serine/arginine-rich splicing factor 7 OS=Homo sapiens OX=9606 GN=SRSF7 PE=1 SV=1	53	6	5	27.4	24	238	11.82	6	8	6	4	3	3	6	6	5	4	3	3
High	O76021	Ribosomal L1 domain-containing protein 1 OS=Homo sapiens OX=9606 GN=RSL1D1 PE=1 SV=3	53	10	10	54.9	20	490	10.13	3	3	4	5	7	6	3	3	4	5	7	6
High	Q9H9L4	KAT8 regulatory NSL complex subunit 2 OS=Homo sapiens OX=9606 GN=KANSL2 PE=1 SV=3	53	12	12	55	32	492	6.62				7	4	8				6	4	7
High	P63173	60S ribosomal protein L38 OS=Homo sapiens OX=9606 GN=RPL38 PE=1 SV=2	53	4	4	8.2	41	70	10.1	8	10	7	4	5	4	4	4	4	2	3	2
High	Q9UMN6	Histone-lysine N-methyltransferase 2B OS=Homo sapiens OX=9606 GN=KMT2B PE=1 SV=1	53	17	13	293.3	9	2715	8.22				7	8	5				7	8	5
High	Q14847	LIM and SH3 domain protein 1 OS=Homo sapiens OX=9606 GN=LASP1 PE=1 SV=2	53	8	8	29.7	35	261	7.05	4	5	5	4	7	4	4	4	5	4	7	4
High	Q9UKM9	RNA-binding protein Raly OS=Homo sapiens OX=9606 GN=RALY PE=1 SV=1	53	9	9	32.4	31	306	9.17	4	5	5	6	5	7	4	5	5	6	4	7
High	P63167	Dynein light chain 1, cytoplasmic OS=Homo sapiens OX=9606 GN=DYNLL1 PE=1 SV=1	53	5	2	10.4	58	89	7.4	4	5	7	7	6	5	2	2	5	4	3	3
High	O75439	Mitochondrial-processing peptidase subunit beta OS=Homo sapiens OX=9606 GN=PMPCB PE=1 SV=2	53	9	8	54.3	21	489	6.83	5	5	3	7	7	6	5	5	3	6	6	5
High	Q06124	Tyrosine-protein phosphatase non-receptor type 11 OS=Homo sapiens OX=9606 GN=PTPN11 PE=1 SV=3	52	13	13	68	27	593	7.3	1	2	5	7	7	7	1	2	5	7	7	7
High	P22061	Protein-L-isoaspartate(D-aspartate) O-methyltransferase OS=Homo sapiens OX=9606 GN=PCMT1 PE=1 SV=4	52	10	10	24.6	54	227	7.21	7	8	6	3	4	2	7	8	4	3	4	2
High	Q8IVT2	Mitotic interactor and substrate of PLK1 OS=Homo sapiens OX=9606 GN=MISP PE=1 SV=1	52	17	17	75.3	36	679	6.83	4	6	10	2	2	4	4	6	10	2	2	4
High	P32969	60S ribosomal protein L9 OS=Homo sapiens OX=9606 GN=RPL9 PE=1 SV=1	52	6	6	21.9	43	192	9.95	7	8	10	3	2	3	4	4	6	3	2	3
High	P48444	Coatomer subunit delta OS=Homo sapiens OX=9606 GN=ARCN1 PE=1 SV=1	52	13	13	57.2	29	511	6.21	6	8	6	4	4	3	6	8	6	4	4	3
High	P07737	Profilin-1 OS=Homo sapiens OX=9606 GN=PFN1 PE=1 SV=2	52	7	4	15	59	140	8.27	6	7	8	3	3	2	6	6	6	3	3	2
High	P83731	60S ribosomal protein L24 OS=Homo sapiens OX=9606 GN=RPL24 PE=1 SV=1	52	5	5	17.8	31	157	11.25	3	4	6	5	7	6	3	4	5	4	5	5
High	Q9NXV2	BTB/POZ domain-containing protein KCTD5 OS=Homo sapiens OX=9606 GN=KCTD5 PE=1 SV=1	52	8	8	26.1	58	234	6.24	6	5	5	5	4	5	5	4	4	4	3	4
High	Q9Y2H5	Pleckstrin homology domain-containing family A member 6 OS=Homo sapiens OX=9606 GN=PLEKHA6 PE=1 SV=4	52	19	19	117.1	25	1048	9.1	4	3	8	2	2	1	4	3	8	2	2	1
High	O14818	Proteasome subunit alpha type-7 OS=Homo sapiens OX=9606 GN=PSMA7 PE=1 SV=1	52	9	9	27.9	46	248	8.46	4	5	5	8	8	6	4	5	4	7	7	5
High	Q93050	V-type proton ATPase 116 kDa subunit a 1 OS=Homo sapiens OX=9606 GN=ATP6V0A1 PE=1 SV=3	52	14	14	96.4	20	837	6.43	4	4	6				4	4	5
High	O15144	Actin-related protein 2/3 complex subunit 2 OS=Homo sapiens OX=9606 GN=ARPC2 PE=1 SV=1	52	11	11	34.3	34	300	7.36	7	5	5	4	5	4	7	5	5	4	5	4
High	P26373	60S ribosomal protein L13 OS=Homo sapiens OX=9606 GN=RPL13 PE=1 SV=4	51	6	6	24.2	28	211	11.65	4	5	4	7	6	6	4	5	4	5	5	5
High	Q92828	Coronin-2A OS=Homo sapiens OX=9606 GN=CORO2A PE=1 SV=2	51	10	9	59.7	21	525	8.05	8	7	5	4	3	3	8	6	4	4	3	3
High	Q9HC84	Mucin-5B OS=Homo sapiens OX=9606 GN=MUC5B PE=1 SV=3	51	11	8	596	4	5762	6.64	2	2	1	10	13	11	2	2	1	7	10	8
High	O43293	Death-associated protein kinase 3 OS=Homo sapiens OX=9606 GN=DAPK3 PE=1 SV=1	51	13	13	52.5	36	454	6.89	9	8	10	1	1	2	9	7	9	1	1	2
High	Q96FW1	Ubiquitin thioesterase OTUB1 OS=Homo sapiens OX=9606 GN=OTUB1 PE=1 SV=2	51	8	8	31.3	42	271	4.94	9	5	5	5	4	4	7	5	5	5	4	4
High	Q13162	Peroxiredoxin-4 OS=Homo sapiens OX=9606 GN=PRDX4 PE=1 SV=1	51	4	2	30.5	13	271	6.29	4	4	4	6	10	8	2	2	2	3	4	4
High	O95433	Activator of 90 kDa heat shock protein ATPase homolog 1 OS=Homo sapiens OX=9606 GN=AHSA1 PE=1 SV=1	51	10	10	38.3	37	338	5.53	7	8	8	3	5	3	5	5	7	3	5	3
High	Q9H4A4	Aminopeptidase B OS=Homo sapiens OX=9606 GN=RNPEP PE=1 SV=2	51	14	14	72.5	27	650	5.74	5	4	5	4	6	1	5	4	5	4	6	1
High	Q00325	Phosphate carrier protein, mitochondrial OS=Homo sapiens OX=9606 GN=SLC25A3 PE=1 SV=2	51	8	8	40.1	25	362	9.38	6	8	6	4	5	4	6	7	6	4	5	4
High	Q15717	ELAV-like protein 1 OS=Homo sapiens OX=9606 GN=ELAVL1 PE=1 SV=2	51	8	8	36.1	30	326	9.17	7	5	6	2	4	3	7	5	6	2	4	3
High	Q9BZF9	Uveal autoantigen with coiled-coil domains and ankyrin repeats OS=Homo sapiens OX=9606 GN=UACA PE=1 SV=2	51	19	19	162.4	16	1416	7.03	8	9	10	1	1	1	8	9	10	1	1	1
High	P04632	Calpain small subunit 1 OS=Homo sapiens OX=9606 GN=CAPNS1 PE=1 SV=1	50	8	8	28.3	39	268	5.2	5	5	7	4	5	5	4	4	6	4	5	5
High	Q16777	Histone H2A type 2-C OS=Homo sapiens OX=9606 GN=H2AC20 PE=1 SV=4	50	3	1	14	27	129	10.9	5	6	10	5	4	4	3	3	2	1	2	1
High	Q14683	Structural maintenance of chromosomes protein 1A OS=Homo sapiens OX=9606 GN=SMC1A PE=1 SV=2	50	16	16	143.1	13	1233	7.64	4	3	4	2	2	7	4	3	4	2	2	7
High	Q9H3U1	Protein unc-45 homolog A OS=Homo sapiens OX=9606 GN=UNC45A PE=1 SV=1	50	14	14	103	18	944	6.07	8	6	9	2	2	2	7	6	9	2	2	2
High	Q01844	RNA-binding protein EWS OS=Homo sapiens OX=9606 GN=EWSR1 PE=1 SV=1	50	7	7	68.4	15	656	9.33	7	4	6	2	8	4	6	4	5	2	5	4
High	O43583	Density-regulated protein OS=Homo sapiens OX=9606 GN=DENR PE=1 SV=2	50	7	7	22.1	37	198	5.3	4	3	7	4	4	3	4	3	7	4	4	3
High	P57721	Poly(rC)-binding protein 3 OS=Homo sapiens OX=9606 GN=PCBP3 PE=1 SV=2	50	5	1	39.4	18	371	8.07	6	5	5	5	6	4	4	3	2	3	3	3
High	O95630	STAM-binding protein OS=Homo sapiens OX=9606 GN=STAMBP PE=1 SV=1	50	10	10	48	31	424	6.29	5	6	6		1		5	6	6		1
High	P84085	ADP-ribosylation factor 5 OS=Homo sapiens OX=9606 GN=ARF5 PE=1 SV=2	50	6	3	20.5	37	180	6.79	7	9	7	3	3	3	5	6	6	3	3	3
High	P62191	26S proteasome regulatory subunit 4 OS=Homo sapiens OX=9606 GN=PSMC1 PE=1 SV=1	50	14	12	49.2	35	440	6.21		1		8	10	9		1		7	9	8
High	P62633	CCHC-type zinc finger nucleic acid binding protein OS=Homo sapiens OX=9606 GN=CNBP PE=1 SV=1	49	6	6	19.5	44	177	7.71	6	5	4	5	7	5	5	4	3	4	5	4
High	Q9UJU6	Drebrin-like protein OS=Homo sapiens OX=9606 GN=DBNL PE=1 SV=1	49	11	11	48.2	34	430	5.05	5	5	6	4	3	4	4	4	6	4	3	4
High	Q9ULC4	Malignant T-cell-amplified sequence 1 OS=Homo sapiens OX=9606 GN=MCTS1 PE=1 SV=1	49	7	7	20.5	44	181	8.82	5	4	3	4	5	5	4	4	3	3	5	4
High	P54868	Hydroxymethylglutaryl-CoA synthase, mitochondrial OS=Homo sapiens OX=9606 GN=HMGCS2 PE=1 SV=1	49	14	13	56.6	33	508	8.16		1		3	5	4		1		3	5	4
High	P36952	Serpin B5 OS=Homo sapiens OX=9606 GN=SERPINB5 PE=1 SV=2	49	10	10	42.1	31	375	6.05	8	7	6	3	5	3	8	7	6	3	5	3
High	P61160	Actin-related protein 2 OS=Homo sapiens OX=9606 GN=ACTR2 PE=1 SV=1	49	9	9	44.7	27	394	6.74	7	6	7	1	5	3	6	5	7	1	5	3
High	Q14376	UDP-glucose 4-epimerase OS=Homo sapiens OX=9606 GN=GALE PE=1 SV=2	49	10	10	38.3	49	348	6.73	4	5	9	2	2	2	4	5	9	2	2	2
High	P61254	60S ribosomal protein L26 OS=Homo sapiens OX=9606 GN=RPL26 PE=1 SV=1	49	5	5	17.2	32	145	10.55	5	5	4	5	7	6	4	4	4	3	5	4
High	P46063	ATP-dependent DNA helicase Q1 OS=Homo sapiens OX=9606 GN=RECQL PE=1 SV=3	49	12	12	73.4	22	649	7.88	4	6	4	3	6	5	4	6	4	3	6	5
High	Q00341	Vigilin OS=Homo sapiens OX=9606 GN=HDLBP PE=1 SV=2	48	12	12	141.4	10	1268	6.87	5	3	4	4	6	3	5	3	4	4	5	3
High	Q8WVV9	Heterogeneous nuclear ribonucleoprotein L-like OS=Homo sapiens OX=9606 GN=HNRNPLL PE=1 SV=1	48	13	12	60	36	542	7.72	6	3	5	1	6	2	6	3	5	1	6	2
High	Q96HC4	PDZ and LIM domain protein 5 OS=Homo sapiens OX=9606 GN=PDLIM5 PE=1 SV=5	48	11	11	63.9	26	596	8.21	3	6	6	3	3	3	3	5	6	3	3	3
High	Q9P2M7	Cingulin OS=Homo sapiens OX=9606 GN=CGN PE=1 SV=3	48	16	16	137	16	1203	5.52	6	8	7	2	1	3	6	8	7	2	1	3
High	O95757	Heat shock 70 kDa protein 4L OS=Homo sapiens OX=9606 GN=HSPA4L PE=1 SV=3	48	15	12	94.5	25	839	5.88	2	3	4	1	5	1	2	3	4	1	4	1
High	Q9HCE1	Helicase MOV-10 OS=Homo sapiens OX=9606 GN=MOV10 PE=1 SV=2	48	14	14	113.6	16	1003	8.82	4	2	2	8	7	7	4	2	2	8	7	6
High	Q96T37	RNA-binding protein 15 OS=Homo sapiens OX=9606 GN=RBM15 PE=1 SV=2	48	9	9	107.1	11	977	10.08	5	3	5	5	3	5	5	3	5	5	3	5
High	Q07020	60S ribosomal protein L18 OS=Homo sapiens OX=9606 GN=RPL18 PE=1 SV=2	48	6	6	21.6	35	188	11.72	2	4	5	5	5	5	2	3	4	5	5	4
High	Q9Y5X1	Sorting nexin-9 OS=Homo sapiens OX=9606 GN=SNX9 PE=1 SV=1	48	10	10	66.6	26	595	5.58	8	8	6	3	5	3	6	6	4	3	5	3
High	Q15185	Prostaglandin E synthase 3 OS=Homo sapiens OX=9606 GN=PTGES3 PE=1 SV=1	48	7	7	18.7	51	160	4.54	7	7	4	3	4	4	6	6	4	3	4	4
High	Q96B97	SH3 domain-containing kinase-binding protein 1 OS=Homo sapiens OX=9606 GN=SH3KBP1 PE=1 SV=2	48	10	10	73.1	17	665	6.62	5	5	5	5	3	1	4	4	4	4	3	1
High	P60891	Ribose-phosphate pyrophosphokinase 1 OS=Homo sapiens OX=9606 GN=PRPS1 PE=1 SV=2	48	8	4	34.8	31	318	6.98	4	6	7	5	4	5	4	6	7	5	4	5
High	O60884	DnaJ homolog subfamily A member 2 OS=Homo sapiens OX=9606 GN=DNAJA2 PE=1 SV=1	48	10	10	45.7	30	412	6.48	6	4	8	5	3	3	6	4	8	5	3	3
High	Q9H0U4	Ras-related protein Rab-1B OS=Homo sapiens OX=9606 GN=RAB1B PE=1 SV=1	48	8	6	22.2	48	201	5.73	7	8	8	2	4	3	5	6	7	2	3	3
High	P62195	26S proteasome regulatory subunit 8 OS=Homo sapiens OX=9606 GN=PSMC5 PE=1 SV=1	48	11	9	45.6	33	406	7.55	1	3	2	6	8	6	1	3	2	5	6	5
High	P22087	rRNA 2'-O-methyltransferase fibrillarin OS=Homo sapiens OX=9606 GN=FBL PE=1 SV=2	48	10	10	33.8	36	321	10.18	6	6	8	1	6	3	6	6	8	1	5	3
High	P04075	Fructose-bisphosphate aldolase A OS=Homo sapiens OX=9606 GN=ALDOA PE=1 SV=2	47	15	14	39.4	41	364	8.09	7	7	11	2	5	4	7	7	9	2	5	4
High	Q9Y6J0	Calcineurin-binding protein cabin-1 OS=Homo sapiens OX=9606 GN=CABIN1 PE=1 SV=1	47	14	14	246.2	10	2220	6.02	6	9	6	2	2	2	6	9	6	2	2	2
High	Q9NVH6	Trimethyllysine dioxygenase, mitochondrial OS=Homo sapiens OX=9606 GN=TMLHE PE=1 SV=1	47	10	10	49.5	24	421	7.72	6	4	5	3	5	5	6	4	5	3	5	5
High	P25786	Proteasome subunit alpha type-1 OS=Homo sapiens OX=9606 GN=PSMA1 PE=1 SV=1	47	9	9	29.5	36	263	6.61	1	3	2	8	8	8	1	3	2	7	7	7
High	P62269	40S ribosomal protein S18 OS=Homo sapiens OX=9606 GN=RPS18 PE=1 SV=3	47	8	8	17.7	48	152	10.99	4	4	9	2	4	4	4	4	7	2	4	3
High	Q9HA64	Ketosamine-3-kinase OS=Homo sapiens OX=9606 GN=FN3KRP PE=1 SV=2	47	8	8	34.4	28	309	7.33	6	5	6	3	5	5	5	5	6	3	4	5
High	Q96QK1	Vacuolar protein sorting-associated protein 35 OS=Homo sapiens OX=9606 GN=VPS35 PE=1 SV=2	47	12	12	91.6	19	796	5.49	6	8	7	2	6	4	6	8	7	2	6	4
High	O60812	Heterogeneous nuclear ribonucleoprotein C-like 1 OS=Homo sapiens OX=9606 GN=HNRNPCL1 PE=1 SV=1	47	6	1	32.1	16	293	5.06	5	5	5	4	4	5	5	4	4	4	4	4
High	Q53H82	Endoribonuclease LACTB2 OS=Homo sapiens OX=9606 GN=LACTB2 PE=1 SV=2	47	10	10	32.8	49	288	6.8	3	3	6	3	4	2	3	3	5	3	4	2
High	P24534	Elongation factor 1-beta OS=Homo sapiens OX=9606 GN=EEF1B2 PE=1 SV=3	47	6	5	24.7	44	225	4.67	4	6	6	2	2	2	4	5	5	2	2	2
High	Q99661	Kinesin-like protein KIF2C OS=Homo sapiens OX=9606 GN=KIF2C PE=1 SV=2	47	13	12	81.3	22	725	7.83	1	1	2	5	5	6	1	1	2	5	5	6
High	P63208	S-phase kinase-associated protein 1 OS=Homo sapiens OX=9606 GN=SKP1 PE=1 SV=2	47	7	7	18.6	51	163	4.54	4	4	4	4	7	4	4	4	4	3	6	4
High	Q9H910	Jupiter microtubule associated homolog 2 OS=Homo sapiens OX=9606 GN=JPT2 PE=1 SV=1	47	8	8	20.1	63	190	9.26	4	4	6	5	5	5	4	4	6	5	5	5
High	Q13492	Phosphatidylinositol-binding clathrin assembly protein OS=Homo sapiens OX=9606 GN=PICALM PE=1 SV=2	47	12	12	70.7	25	652	7.9	6	4	7	2	4	3	6	4	7	2	4	3
High	P84103	Serine/arginine-rich splicing factor 3 OS=Homo sapiens OX=9606 GN=SRSF3 PE=1 SV=1	47	6	5	19.3	35	164	11.65	3	5	4	3	3	4	3	3	3	3	3	4
High	Q9BWF3	RNA-binding protein 4 OS=Homo sapiens OX=9606 GN=RBM4 PE=1 SV=1	47	8	8	40.3	27	364	7.08	1	3	4	5	6	5	1	3	4	5	4	4
High	Q9Y5S2	Serine/threonine-protein kinase MRCK beta OS=Homo sapiens OX=9606 GN=CDC42BPB PE=1 SV=2	47	17	13	194.2	13	1711	6.37	3	5	4				3	5	4
High	A0FGR8	Extended synaptotagmin-2 OS=Homo sapiens OX=9606 GN=ESYT2 PE=1 SV=1	47	14	14	102.3	21	921	9.26	9	10	10	1	2		9	10	9	1	2
High	Q8N680	Zinc finger and BTB domain-containing protein 2 OS=Homo sapiens OX=9606 GN=ZBTB2 PE=1 SV=1	47	10	10	57.3	29	514	6.1				6	5	5				6	5	5
High	Q13148	TAR DNA-binding protein 43 OS=Homo sapiens OX=9606 GN=TARDBP PE=1 SV=1	47	8	8	44.7	28	414	6.19	5	5	6	3	4	3	5	5	5	3	4	2
High	O75223	Gamma-glutamylcyclotransferase OS=Homo sapiens OX=9606 GN=GGCT PE=1 SV=1	47	9	9	21	47	188	5.14	1	3	3	8	5	5	1	3	3	7	5	5
High	Q9Y6M1	Insulin-like growth factor 2 mRNA-binding protein 2 OS=Homo sapiens OX=9606 GN=IGF2BP2 PE=1 SV=2	46	10	8	66.1	22	599	8.46	2	2	7	4	4	3	2	2	7	4	4	3
High	Q9NVP1	ATP-dependent RNA helicase DDX18 OS=Homo sapiens OX=9606 GN=DDX18 PE=1 SV=2	46	11	11	75.4	20	670	9.5	5	4	4	2	3	2	5	4	4	2	3	2
High	Q14444	Caprin-1 OS=Homo sapiens OX=9606 GN=CAPRIN1 PE=1 SV=2	46	6	6	78.3	13	709	5.25	4	4	4	5	7	6	4	4	4	5	6	6
High	P43246	DNA mismatch repair protein Msh2 OS=Homo sapiens OX=9606 GN=MSH2 PE=1 SV=1	46	15	15	104.7	17	934	5.77	3	4	4	3	5	4	3	4	4	3	5	4
High	Q14690	Protein RRP5 homolog OS=Homo sapiens OX=9606 GN=PDCD11 PE=1 SV=3	46	17	17	208.6	10	1871	8.87	1		2	3	3	2	1		2	3	3	2
High	P00367	Glutamate dehydrogenase 1, mitochondrial OS=Homo sapiens OX=9606 GN=GLUD1 PE=1 SV=2	46	10	10	61.4	23	558	7.8	5	6	10	3	4	2	5	6	9	3	4	2
High	Q96GQ7	Probable ATP-dependent RNA helicase DDX27 OS=Homo sapiens OX=9606 GN=DDX27 PE=1 SV=2	46	15	15	89.8	20	796	9.28			1	2	8	4			1	2	8	4
High	P35232	Prohibitin 1 OS=Homo sapiens OX=9606 GN=PHB1 PE=1 SV=1	46	10	10	29.8	42	272	5.76	3	3	6	6	1	5	3	3	6	6	1	5
High	P06730	Eukaryotic translation initiation factor 4E OS=Homo sapiens OX=9606 GN=EIF4E PE=1 SV=2	46	8	8	25.1	34	217	6.15	4	4	5	5	4	5	4	3	4	5	4	5
High	O43242	26S proteasome non-ATPase regulatory subunit 3 OS=Homo sapiens OX=9606 GN=PSMD3 PE=1 SV=2	46	13	13	60.9	24	534	8.44				9	10	9				9	10	9
High	Q9BZK7	F-box-like/WD repeat-containing protein TBL1XR1 OS=Homo sapiens OX=9606 GN=TBL1XR1 PE=1 SV=1	46	7	7	55.6	24	514	5.55	3	2	2	5	4	5	3	2	2	5	4	4
High	Q07157	Tight junction protein ZO-1 OS=Homo sapiens OX=9606 GN=TJP1 PE=1 SV=3	46	12	12	195.3	10	1748	6.7	6	5	6	4	5	2	6	5	6	4	5	2
High	Q9BRX2	Protein pelota homolog OS=Homo sapiens OX=9606 GN=PELO PE=1 SV=2	46	10	10	43.3	33	385	6.34	4	4	6	3	7	4	4	3	6	3	7	4
High	Q9Y3B7	39S ribosomal protein L11, mitochondrial OS=Homo sapiens OX=9606 GN=MRPL11 PE=1 SV=1	46	11	11	20.7	54	192	9.91	4	4	2	4	4	5	4	4	2	4	4	5
High	P08708	40S ribosomal protein S17 OS=Homo sapiens OX=9606 GN=RPS17 PE=1 SV=2	46	5	5	15.5	49	135	9.85	7	7	8	1	1	1	5	5	5	1	1	1
High	Q9H0D6	5'-3' exoribonuclease 2 OS=Homo sapiens OX=9606 GN=XRN2 PE=1 SV=1	46	12	12	108.5	16	950	7.47	4	3	4	6	6	4	4	3	4	6	6	4
High	P68036	Ubiquitin-conjugating enzyme E2 L3 OS=Homo sapiens OX=9606 GN=UBE2L3 PE=1 SV=1	46	7	7	17.9	65	154	8.51	5	8	6	2	4	4	4	6	5	2	4	4
High	P58546	Myotrophin OS=Homo sapiens OX=9606 GN=MTPN PE=1 SV=2	45	5	5	12.9	55	118	5.52	5	4	5	4	5	2	4	3	3	3	3	1
High	Q8NE71	ATP-binding cassette sub-family F member 1 OS=Homo sapiens OX=9606 GN=ABCF1 PE=1 SV=2	45	13	13	95.9	21	845	6.8	4	3	1	5	4	4	4	3	1	5	4	4
High	P82650	28S ribosomal protein S22, mitochondrial OS=Homo sapiens OX=9606 GN=MRPS22 PE=1 SV=1	45	9	9	41.3	26	360	7.9	1	1	2	4	7	5	1	1	2	4	7	5
High	Q0VDF9	Heat shock 70 kDa protein 14 OS=Homo sapiens OX=9606 GN=HSPA14 PE=1 SV=1	45	11	11	54.8	28	509	5.59	4	2	8	6	6	4	4	2	7	5	6	4
High	Q9Y3U8	60S ribosomal protein L36 OS=Homo sapiens OX=9606 GN=RPL36 PE=1 SV=3	45	4	4	12.2	30	105	11.59	4	4	4	5	5	5	3	3	3	4	3	4
High	Q92974	Rho guanine nucleotide exchange factor 2 OS=Homo sapiens OX=9606 GN=ARHGEF2 PE=1 SV=4	45	16	16	111.5	18	986	7.27	10	9	8	2		1	10	8	8	2		1
High	Q658Y4	Protein FAM91A1 OS=Homo sapiens OX=9606 GN=FAM91A1 PE=1 SV=3	45	11	11	93.9	16	838	6.39	5	4	5	2	2	2	5	4	5	2	2	2
High	Q9NZT2	Opioid growth factor receptor OS=Homo sapiens OX=9606 GN=OGFR PE=1 SV=3	45	10	10	73.3	21	677	4.84	5	5	4	4	6	4	5	5	4	4	6	4
High	P17096	High mobility group protein HMG-I/HMG-Y OS=Homo sapiens OX=9606 GN=HMGA1 PE=1 SV=3	45	8	8	11.7	41	107	10.32	6	6	10	3	5	2	5	5	7	3	5	2
High	Q14566	DNA replication licensing factor MCM6 OS=Homo sapiens OX=9606 GN=MCM6 PE=1 SV=1	45	16	16	92.8	23	821	5.41	7	13	6	3	3	5	7	13	6	3	3	5
High	Q9H773	dCTP pyrophosphatase 1 OS=Homo sapiens OX=9606 GN=DCTPP1 PE=1 SV=1	45	10	10	18.7	59	170	5.03	4	3	7	3	3	4	4	3	7	3	3	4
High	Q08945	FACT complex subunit SSRP1 OS=Homo sapiens OX=9606 GN=SSRP1 PE=1 SV=1	45	13	13	81	25	709	6.87	6	6	9	1	4	1	5	5	9	1	4	1
High	P31942	Heterogeneous nuclear ribonucleoprotein H3 OS=Homo sapiens OX=9606 GN=HNRNPH3 PE=1 SV=2	45	6	5	36.9	25	346	6.87	8	6	4	3	5	4	6	5	4	3	4	4
High	P62854	40S ribosomal protein S26 OS=Homo sapiens OX=9606 GN=RPS26 PE=1 SV=3	45	4	4	13	44	115	11	2	3	5	3	3	2	2	2	3	2	2	2
High	P53041	Serine/threonine-protein phosphatase 5 OS=Homo sapiens OX=9606 GN=PPP5C PE=1 SV=1	45	10	10	56.8	24	499	6.28	4	3	3	3	5	4	4	3	3	3	5	4
High	P25789	Proteasome subunit alpha type-4 OS=Homo sapiens OX=9606 GN=PSMA4 PE=1 SV=1	45	8	8	29.5	39	261	7.72	5	3	4	4	8	4	3	2	4	4	6	4
High	Q9ULZ3	Apoptosis-associated speck-like protein containing a CARD OS=Homo sapiens OX=9606 GN=PYCARD PE=1 SV=2	44	8	8	21.6	42	195	6.34	5	7	6	3	5	4	5	7	5	3	5	4
High	Q7L5N7	Lysophosphatidylcholine acyltransferase 2 OS=Homo sapiens OX=9606 GN=LPCAT2 PE=1 SV=1	44	10	10	60.2	26	544	6.55	4	5	4	3	3	4	4	5	4	3	3	4
High	Q92734	Protein TFG OS=Homo sapiens OX=9606 GN=TFG PE=1 SV=2	44	8	8	43.4	33	400	5.1	7	8	8	3	3	2	7	8	7	3	3	2
High	P11277	Spectrin beta chain, erythrocytic OS=Homo sapiens OX=9606 GN=SPTB PE=1 SV=5	44	8	1	246.3	5	2137	5.27	8	10	5	3	1	1	5	6	5	3	1	1
High	Q16881	Thioredoxin reductase 1, cytoplasmic OS=Homo sapiens OX=9606 GN=TXNRD1 PE=1 SV=3	44	10	10	70.9	20	649	7.39	2	5	5	5	2	4	2	5	5	5	2	4
High	Q99460	26S proteasome non-ATPase regulatory subunit 1 OS=Homo sapiens OX=9606 GN=PSMD1 PE=1 SV=2	44	12	12	105.8	18	953	5.39				6	9	7				6	8	7
High	Q68CZ2	Tensin-3 OS=Homo sapiens OX=9606 GN=TNS3 PE=1 SV=2	44	7	6	155.2	8	1445	6.81	4	6	6	3	4	2	3	4	5	3	4	2
High	P57740	Nuclear pore complex protein Nup107 OS=Homo sapiens OX=9606 GN=NUP107 PE=1 SV=1	44	13	13	106.3	19	925	5.43	5	2	4	1		1	3	2	4	1		1
High	P60174	Triosephosphate isomerase OS=Homo sapiens OX=9606 GN=TPI1 PE=1 SV=4	44	9	9	26.7	49	249	6.9	7	6	9	3	3	2	6	5	8	3	3	2
High	Q9H6T0	Epithelial splicing regulatory protein 2 OS=Homo sapiens OX=9606 GN=ESRP2 PE=1 SV=1	44	10	8	78.4	17	727	6.71	2	3	5	3	3	3	2	3	4	3	2	3
High	Q15652	Probable JmjC domain-containing histone demethylation protein 2C OS=Homo sapiens OX=9606 GN=JMJD1C PE=1 SV=2	44	16	16	284.3	7	2540	7.87				6	10	7				6	10	7
High	P48047	ATP synthase subunit O, mitochondrial OS=Homo sapiens OX=9606 GN=ATP5PO PE=1 SV=1	44	8	8	23.3	45	213	9.96	4	4	6	5	5	6	4	4	5	5	4	6
High	P20042	Eukaryotic translation initiation factor 2 subunit 2 OS=Homo sapiens OX=9606 GN=EIF2S2 PE=1 SV=2	44	10	10	38.4	35	333	5.8	2	3	3	5	6	4	2	3	3	5	4	4
High	Q99961	Endophilin-A2 OS=Homo sapiens OX=9606 GN=SH3GL1 PE=1 SV=1	43	9	9	41.5	26	368	5.43	3	2	2	4	7	4	3	2	2	4	7	4
High	Q02880	DNA topoisomerase 2-beta OS=Homo sapiens OX=9606 GN=TOP2B PE=1 SV=3	43	10	2	183.2	6	1626	8	6	7	5	2	5	2	6	7	5	2	4	2
High	Q9P0L0	Vesicle-associated membrane protein-associated protein A OS=Homo sapiens OX=9606 GN=VAPA PE=1 SV=3	43	6	5	27.9	37	249	8.62	4	4	6	2	4	2	4	4	4	1	3	2
High	O00291	Huntingtin-interacting protein 1 OS=Homo sapiens OX=9606 GN=HIP1 PE=1 SV=5	43	15	14	116.1	17	1037	5.3	2	2	3		1		2	2	3		1
High	Q9UKK3	Protein mono-ADP-ribosyltransferase PARP4 OS=Homo sapiens OX=9606 GN=PARP4 PE=1 SV=3	43	16	16	192.5	11	1724	5.66	4	3	4	5	7	3	4	3	4	5	7	3
High	P46734	Dual specificity mitogen-activated protein kinase kinase 3 OS=Homo sapiens OX=9606 GN=MAP2K3 PE=1 SV=2	43	9	9	39.3	31	347	7.43	6	5	5	2	5	4	6	5	4	2	5	4
High	Q9H9H4	Vacuolar protein sorting-associated protein 37B OS=Homo sapiens OX=9606 GN=VPS37B PE=1 SV=1	43	5	5	31.3	25	285	7.34	5	4	3	4	5	4	5	4	3	4	4	4
High	Q02543	60S ribosomal protein L18a OS=Homo sapiens OX=9606 GN=RPL18A PE=1 SV=2	43	5	5	20.7	30	176	10.71	3	3	4	3	3	4	3	3	4	2	2	2
High	O75362	Zinc finger protein 217 OS=Homo sapiens OX=9606 GN=ZNF217 PE=1 SV=1	43	21	21	115.2	31	1048	8.48						1						1
High	O15355	Protein phosphatase 1G OS=Homo sapiens OX=9606 GN=PPM1G PE=1 SV=1	43	10	10	59.2	27	546	4.36			2	4	5	6			2	4	5	6
High	P62910	60S ribosomal protein L32 OS=Homo sapiens OX=9606 GN=RPL32 PE=1 SV=2	43	6	6	15.9	39	135	11.33	5	4	3	3	3	4	4	3	2	2	2	3
High	Q96H79	Zinc finger CCCH-type antiviral protein 1-like OS=Homo sapiens OX=9606 GN=ZC3HAV1L PE=1 SV=2	43	6	6	32.9	29	300	8.13	3	3	7	3	4	5	3	3	6	2	4	4
High	P25398	40S ribosomal protein S12 OS=Homo sapiens OX=9606 GN=RPS12 PE=1 SV=3	43	6	6	14.5	53	132	7.21	5	5	6	4	4	3	5	5	6	4	4	3
High	P56545	C-terminal-binding protein 2 OS=Homo sapiens OX=9606 GN=CTBP2 PE=1 SV=1	43	8	6	48.9	22	445	6.95	3	4	4	4	3	3	3	4	4	4	3	3
High	P12268	Inosine-5'-monophosphate dehydrogenase 2 OS=Homo sapiens OX=9606 GN=IMPDH2 PE=1 SV=2	43	8	7	55.8	18	514	6.9	3	2	4	2	4	4	3	2	4	2	4	4
High	P19525	Interferon-induced, double-stranded RNA-activated protein kinase OS=Homo sapiens OX=9606 GN=EIF2AK2 PE=1 SV=2	43	9	9	62.1	19	551	8.4	1	3	1	5	6	7	1	3	1	5	6	7
High	Q12792	Twinfilin-1 OS=Homo sapiens OX=9606 GN=TWF1 PE=1 SV=3	42	8	7	40.3	21	350	6.96	5	6	5	3	3	5	4	4	4	3	3	5
High	O14976	Cyclin-G-associated kinase OS=Homo sapiens OX=9606 GN=GAK PE=1 SV=2	42	17	17	143.1	17	1311	5.73	3	3	2		2	1	3	3	2		2	1
High	P19367	Hexokinase-1 OS=Homo sapiens OX=9606 GN=HK1 PE=1 SV=3	42	14	9	102.4	15	917	6.8	6	9	5	1	1		6	9	5	1	1
High	Q9H0A0	RNA cytidine acetyltransferase OS=Homo sapiens OX=9606 GN=NAT10 PE=1 SV=2	42	12	12	115.7	14	1025	8.27	1	2	4	4	5	2	1	2	4	4	5	2
High	P29353	SHC-transforming protein 1 OS=Homo sapiens OX=9606 GN=SHC1 PE=1 SV=4	42	10	10	62.8	26	583	6.44	2		3	5	4	6	2		3	5	4	6
High	O75179	Ankyrin repeat domain-containing protein 17 OS=Homo sapiens OX=9606 GN=ANKRD17 PE=1 SV=3	42	13	7	274.1	7	2603	6.52				7	8	9				7	8	9
High	Q04828	Aldo-keto reductase family 1 member C1 OS=Homo sapiens OX=9606 GN=AKR1C1 PE=1 SV=1	42	7	1	36.8	25	323	7.88	7	7	6	2	3	2	6	6	5	2	3	2
High	P04844	Dolichyl-diphosphooligosaccharide--protein glycosyltransferase subunit 2 OS=Homo sapiens OX=9606 GN=RPN2 PE=1 SV=3	42	12	12	69.2	30	631	5.69	8	9	3	3	2	1	8	9	3	3	2	1
High	P08240	Signal recognition particle receptor subunit alpha OS=Homo sapiens OX=9606 GN=SRPRA PE=1 SV=2	42	11	11	69.8	20	638	8.95	6	7	7	2	1	1	6	7	7	2	1	1
High	Q5H9F3	BCL-6 corepressor-like protein 1 OS=Homo sapiens OX=9606 GN=BCORL1 PE=1 SV=2	42	14	13	190.4	10	1785	7.85				8	8	7				8	8	7
High	Q9Y4E8	Ubiquitin carboxyl-terminal hydrolase 15 OS=Homo sapiens OX=9606 GN=USP15 PE=1 SV=3	42	12	12	112.3	14	981	5.22	5	2	3	4	7	4	5	2	3	4	7	4
High	Q9BR76	Coronin-1B OS=Homo sapiens OX=9606 GN=CORO1B PE=1 SV=1	42	9	9	54.2	20	489	5.88	4	5	5	3	4	6	4	5	4	3	4	6
High	O75531	Barrier-to-autointegration factor OS=Homo sapiens OX=9606 GN=BANF1 PE=1 SV=1	42	4	4	10.1	51	89	6.09	10	9	11	3	1	2	4	4	4	1	1	1
High	P37108	Signal recognition particle 14 kDa protein OS=Homo sapiens OX=9606 GN=SRP14 PE=1 SV=2	42	5	5	14.6	30	136	10.04	4	4	2	3	6	4	3	3	2	3	4	4
High	O95487	Protein transport protein Sec24B OS=Homo sapiens OX=9606 GN=SEC24B PE=1 SV=2	42	11	9	137.3	10	1268	6.67			1	3	5	3			1	3	5	3
High	Q9UNM6	26S proteasome non-ATPase regulatory subunit 13 OS=Homo sapiens OX=9606 GN=PSMD13 PE=1 SV=2	42	11	11	42.9	29	376	5.81	1		1	6	10	6	1		1	6	10	6
High	A0AVT1	Ubiquitin-like modifier-activating enzyme 6 OS=Homo sapiens OX=9606 GN=UBA6 PE=1 SV=1	42	14	14	117.9	15	1052	6.14	5	5	3	2	2	4	5	5	3	2	2	4
High	Q6P2Q9	Pre-mRNA-processing-splicing factor 8 OS=Homo sapiens OX=9606 GN=PRPF8 PE=1 SV=2	42	18	18	273.4	9	2335	8.84	2	3	2	3	5	2	2	3	2	3	5	2
High	Q06787	Synaptic functional regulator FMR1 OS=Homo sapiens OX=9606 GN=FMR1 PE=1 SV=1	42	8	6	71.1	15	632	7.42	5	4	2	4	6	4	5	4	2	4	6	4
High	Q8NFJ5	Retinoic acid-induced protein 3 OS=Homo sapiens OX=9606 GN=GPRC5A PE=1 SV=2	42	5	5	40.2	14	357	8.15	5	5	7	1	3	1	4	4	5	1	3	1
High	Q9Y2T2	AP-3 complex subunit mu-1 OS=Homo sapiens OX=9606 GN=AP3M1 PE=1 SV=1	42	10	8	46.9	35	418	6.93	6	5	6	3	3	3	6	5	6	3	3	3
High	P80188	Neutrophil gelatinase-associated lipocalin OS=Homo sapiens OX=9606 GN=LCN2 PE=1 SV=2	41	6	6	22.6	40	198	8.91	4	3	4	2	4	3	3	2	3	1	3	2
High	Q71UM5	40S ribosomal protein S27-like OS=Homo sapiens OX=9606 GN=RPS27L PE=1 SV=3	41	5	2	9.5	40	84	9.45	4	5	3	2	3	2	4	4	2	2	3	2
High	P61962	DDB1- and CUL4-associated factor 7 OS=Homo sapiens OX=9606 GN=DCAF7 PE=1 SV=1	41	9	9	38.9	30	342	5.52	1	2	3	5	6	4	1	2	3	4	6	4
High	P06493	Cyclin-dependent kinase 1 OS=Homo sapiens OX=9606 GN=CDK1 PE=1 SV=3	41	7	5	34.1	26	297	8.4	4	5	6	4	3	5	4	4	5	3	2	5
High	P34897	Serine hydroxymethyltransferase, mitochondrial OS=Homo sapiens OX=9606 GN=SHMT2 PE=1 SV=3	41	12	11	56	27	504	8.53	4	7	8	1	2	2	3	7	7	1	2	2
High	P51148	Ras-related protein Rab-5C OS=Homo sapiens OX=9606 GN=RAB5C PE=1 SV=2	41	7	4	23.5	39	216	8.41	4	6	6	2	4	2	4	6	6	2	4	2
High	Q7KZI7	Serine/threonine-protein kinase MARK2 OS=Homo sapiens OX=9606 GN=MARK2 PE=1 SV=2	41	11	8	87.9	18	788	9.72	5	4	5	1	1	1	5	4	5	1	1	1
High	O95816	BAG family molecular chaperone regulator 2 OS=Homo sapiens OX=9606 GN=BAG2 PE=1 SV=1	41	8	8	23.8	51	211	6.7	5	4	5	4	3	2	4	4	4	4	3	2
High	Q9H0W9	Ester hydrolase C11orf54 OS=Homo sapiens OX=9606 GN=C11orf54 PE=1 SV=1	41	7	7	35.1	30	315	6.7	5	6	4	2	3	3	5	6	4	2	3	3
High	O14579	Coatomer subunit epsilon OS=Homo sapiens OX=9606 GN=COPE PE=1 SV=3	41	7	7	34.5	27	308	5.12	5	5	4	1	1		5	5	4	1	1
High	Q9NSE4	Isoleucine--tRNA ligase, mitochondrial OS=Homo sapiens OX=9606 GN=IARS2 PE=1 SV=2	41	10	10	113.7	12	1012	7.2	10	9	8	1	1	1	9	9	8	1	1	1
High	O00299	Chloride intracellular channel protein 1 OS=Homo sapiens OX=9606 GN=CLIC1 PE=1 SV=4	41	10	10	26.9	61	241	5.17	4	6	5	2	4	2	3	5	5	2	4	2
High	P33316	Deoxyuridine 5'-triphosphate nucleotidohydrolase, mitochondrial OS=Homo sapiens OX=9606 GN=DUT PE=1 SV=4	41	6	6	26.5	31	252	9.36	5	5	4	3	6	4	4	4	4	3	5	4
High	P60900	Proteasome subunit alpha type-6 OS=Homo sapiens OX=9606 GN=PSMA6 PE=1 SV=1	41	8	8	27.4	36	246	6.76	3	1	1	6	11	6	3	1	1	5	8	5
High	P22695	Cytochrome b-c1 complex subunit 2, mitochondrial OS=Homo sapiens OX=9606 GN=UQCRC2 PE=1 SV=3	41	9	9	48.4	29	453	8.63	6	6	6	2	3	2	5	5	6	2	2	2
High	P35573	Glycogen debranching enzyme OS=Homo sapiens OX=9606 GN=AGL PE=1 SV=3	41	11	11	174.7	9	1532	6.76	2	1	2	3	5	3	2	1	2	3	5	3
High	P46778	60S ribosomal protein L21 OS=Homo sapiens OX=9606 GN=RPL21 PE=1 SV=2	41	6	6	18.6	34	160	10.49	2	5	3	4	4	5	2	4	2	3	3	5
High	Q5VWN6	Protein TASOR 2 OS=Homo sapiens OX=9606 GN=TASOR2 PE=1 SV=1	41	16	16	268.7	8	2430	5.9				5	6	7				5	6	7
High	Q9UEW8	STE20/SPS1-related proline-alanine-rich protein kinase OS=Homo sapiens OX=9606 GN=STK39 PE=1 SV=3	41	11	7	59.4	26	545	6.29	6	5	5	2	3	3	6	5	5	2	3	3
High	O14744	Protein arginine N-methyltransferase 5 OS=Homo sapiens OX=9606 GN=PRMT5 PE=1 SV=4	41	12	12	72.6	22	637	6.29	4	2	2	3	6	5	4	2	2	3	6	4
High	P12694	2-oxoisovalerate dehydrogenase subunit alpha, mitochondrial OS=Homo sapiens OX=9606 GN=BCKDHA PE=1 SV=2	41	9	9	50.4	25	445	8.27	6	5	6	2	3	4	5	4	6	2	3	4
High	Q9P2R7	Succinate--CoA ligase [ADP-forming] subunit beta, mitochondrial OS=Homo sapiens OX=9606 GN=SUCLA2 PE=1 SV=3	41	9	9	50.3	18	463	7.42	5	7	7	2	5	2	5	5	7	2	5	2
High	P63000	Ras-related C3 botulinum toxin substrate 1 OS=Homo sapiens OX=9606 GN=RAC1 PE=1 SV=1	41	6	5	21.4	33	192	8.5	3	5	4	3	4	3	3	4	3	3	4	3
High	P35659	Protein DEK OS=Homo sapiens OX=9606 GN=DEK PE=1 SV=1	41	10	10	42.6	33	375	8.56				5	7	6				5	6	6
High	P23193	Transcription elongation factor A protein 1 OS=Homo sapiens OX=9606 GN=TCEA1 PE=1 SV=2	41	9	9	33.9	35	301	8.38	1	1	4	4	4	5	1	1	4	4	4	5
High	Q9UHD8	Septin-9 OS=Homo sapiens OX=9606 GN=SEPTIN9 PE=1 SV=2	41	10	10	65.4	21	586	8.97	5	4	7	3	1	2	5	4	7	3	1	2
High	P15927	Replication protein A 32 kDa subunit OS=Homo sapiens OX=9606 GN=RPA2 PE=1 SV=1	41	7	7	29.2	46	270	6.15	6	6	8	4	4	3	5	5	6	4	4	3
High	Q96QV6	Histone H2A type 1-A OS=Homo sapiens OX=9606 GN=H2AC1 PE=1 SV=3	40	3	1	14.2	30	131	10.86	5	5	7	5	4	4	3	3	2	1	2	1
High	P55212	Caspase-6 OS=Homo sapiens OX=9606 GN=CASP6 PE=1 SV=2	40	8	7	33.3	29	293	6.93	2	4	6	4	4	5	2	4	6	4	4	5
High	Q8NFW8	N-acylneuraminate cytidylyltransferase OS=Homo sapiens OX=9606 GN=CMAS PE=1 SV=2	40	11	11	48.3	30	434	7.93	2	2	3	3	6	2	2	2	3	3	6	2
High	Q7Z3B4	Nucleoporin p54 OS=Homo sapiens OX=9606 GN=NUP54 PE=1 SV=2	40	10	10	55.4	22	507	7.02				3	7	5				3	7	4
High	P14621	Acylphosphatase-2 OS=Homo sapiens OX=9606 GN=ACYP2 PE=1 SV=2	40	5	5	11.1	46	99	9.5	3	4	5	5	4	4	3	4	5	5	4	4
High	Q96I24	Far upstream element-binding protein 3 OS=Homo sapiens OX=9606 GN=FUBP3 PE=1 SV=2	40	10	9	61.6	27	572	8.38	3	4	5	1	1	3	3	4	5	1	1	3
High	Q9BZL6	Serine/threonine-protein kinase D2 OS=Homo sapiens OX=9606 GN=PRKD2 PE=1 SV=3	40	12	12	96.7	19	878	6.84	6	7	9	1	2	2	6	6	9	1	2	2
High	P62333	26S proteasome regulatory subunit 10B OS=Homo sapiens OX=9606 GN=PSMC6 PE=1 SV=1	40	10	10	44.1	31	389	7.49	2	2	2	4	6	6	2	2	2	4	6	6
High	Q9NP81	Serine--tRNA ligase, mitochondrial OS=Homo sapiens OX=9606 GN=SARS2 PE=1 SV=1	40	11	11	58.2	31	518	8.13	2	2	3	3	2	3	2	2	3	3	2	3
High	O75746	Calcium-binding mitochondrial carrier protein Aralar1 OS=Homo sapiens OX=9606 GN=SLC25A12 PE=1 SV=2	40	10	5	74.7	16	678	8.38	8	8	8	2	3	2	8	8	8	2	3	2
High	Q9Y2T7	Y-box-binding protein 2 OS=Homo sapiens OX=9606 GN=YBX2 PE=1 SV=2	40	4	1	38.5	14	364	10.8	2	2	4	5	3	5	2	2	3	4	2	4
High	Q9UBX3	Mitochondrial dicarboxylate carrier OS=Homo sapiens OX=9606 GN=SLC25A10 PE=1 SV=2	40	9	9	31.3	34	287	9.54	8	5	9	1	3	1	6	4	7	1	3	1
High	Q9UQB8	Brain-specific angiogenesis inhibitor 1-associated protein 2 OS=Homo sapiens OX=9606 GN=BAIAP2 PE=1 SV=1	40	11	11	60.8	23	552	8.9	3	5	5		1	1	3	5	5		1	1
High	P48506	Glutamate--cysteine ligase catalytic subunit OS=Homo sapiens OX=9606 GN=GCLC PE=1 SV=2	40	10	10	72.7	19	637	6.09	1	3	2	3	5	2	1	3	2	3	5	2
High	Q9Y314	Nitric oxide synthase-interacting protein OS=Homo sapiens OX=9606 GN=NOSIP PE=1 SV=1	40	8	8	33.2	36	301	8.82	1	2	2	7	5	6	1	2	2	6	5	6
High	Q9H845	Complex I assembly factor ACAD9, mitochondrial OS=Homo sapiens OX=9606 GN=ACAD9 PE=1 SV=1	40	14	14	68.7	23	621	7.96	4	5	6	1	2		4	5	6	1	2
High	O75083	WD repeat-containing protein 1 OS=Homo sapiens OX=9606 GN=WDR1 PE=1 SV=4	40	9	9	66.2	21	606	6.65	5	6	6	1	2	2	5	6	6	1	2	2
High	Q7KZF4	Staphylococcal nuclease domain-containing protein 1 OS=Homo sapiens OX=9606 GN=SND1 PE=1 SV=1	40	15	15	101.9	20	910	7.17	4	3	3	1	3	2	4	3	3	1	3	2
High	P36969	Phospholipid hydroperoxide glutathione peroxidase OS=Homo sapiens OX=9606 GN=GPX4 PE=1 SV=3	40	9	9	22.2	44	197	8.37	3	3	2	3	4	3	3	3	2	3	4	3
High	O00763	Acetyl-CoA carboxylase 2 OS=Homo sapiens OX=9606 GN=ACACB PE=1 SV=3	40	8	1	276.4	4	2458	6.49	5	5	4	4	2	4	5	5	4	4	2	4
High	Q86X55	Histone-arginine methyltransferase CARM1 OS=Homo sapiens OX=9606 GN=CARM1 PE=1 SV=3	39	9	9	65.8	17	608	6.73	3	3	3	4	5	4	3	3	3	4	5	4
High	P09012	U1 small nuclear ribonucleoprotein A OS=Homo sapiens OX=9606 GN=SNRPA PE=1 SV=3	39	6	4	31.3	27	282	9.83	4	4	3	4	4	5	4	4	3	4	3	5
High	Q86X29	Lipolysis-stimulated lipoprotein receptor OS=Homo sapiens OX=9606 GN=LSR PE=1 SV=4	39	9	9	71.4	18	649	7.97	3	3	7	1	1	1	3	3	7	1	1	1
High	Q13151	Heterogeneous nuclear ribonucleoprotein A0 OS=Homo sapiens OX=9606 GN=HNRNPA0 PE=1 SV=1	39	8	7	30.8	31	305	9.29	6	8	8	2	1	1	5	7	6	2	1	1
High	Q53H96	Pyrroline-5-carboxylate reductase 3 OS=Homo sapiens OX=9606 GN=PYCR3 PE=1 SV=3	39	7	7	28.6	36	274	7.72	5	3	3	3	3	3	4	3	2	3	3	3
High	Q99829	Copine-1 OS=Homo sapiens OX=9606 GN=CPNE1 PE=1 SV=1	39	9	9	59	17	537	5.83	5	5	4	3	2	4	5	5	4	3	2	4
High	Q9GZP4	PITH domain-containing protein 1 OS=Homo sapiens OX=9606 GN=PITHD1 PE=1 SV=1	39	8	8	24.2	52	211	5.74	4	5	6	2	3	3	4	5	5	2	3	3
High	P06744	Glucose-6-phosphate isomerase OS=Homo sapiens OX=9606 GN=GPI PE=1 SV=4	39	10	10	63.1	22	558	8.32	7	5	9				6	5	8
High	P16401	Histone H1.5 OS=Homo sapiens OX=9606 GN=H1-5 PE=1 SV=3	39	4	4	22.6	15	226	10.92	1	4	4	3	6	5	1	3	3	2	3	4
High	O75608	Acyl-protein thioesterase 1 OS=Homo sapiens OX=9606 GN=LYPLA1 PE=1 SV=1	39	5	5	24.7	28	230	6.77	4	4	5	3	4	4	4	4	5	3	4	4
High	P08195	4F2 cell-surface antigen heavy chain OS=Homo sapiens OX=9606 GN=SLC3A2 PE=1 SV=3	39	10	10	68	22	630	5.01	7	3	6	4	5	4	7	3	6	4	4	4
High	P41091	Eukaryotic translation initiation factor 2 subunit 3 OS=Homo sapiens OX=9606 GN=EIF2S3 PE=1 SV=3	39	8	8	51.1	18	472	8.4	3	2	2	3	6	5	3	2	2	3	6	4
High	Q56VL3	OCIA domain-containing protein 2 OS=Homo sapiens OX=9606 GN=OCIAD2 PE=1 SV=1	39	6	6	16.9	38	154	9.03	6	5	4	3	4	3	5	5	4	3	4	3
High	Q9UPN3	Microtubule-actin cross-linking factor 1, isoforms 1/2/3/5 OS=Homo sapiens OX=9606 GN=MACF1 PE=1 SV=4	39	13	12	837.8	2	7388	5.39	3	5	4		2	1	3	5	4		2	1
High	O60296	Trafficking kinesin-binding protein 2 OS=Homo sapiens OX=9606 GN=TRAK2 PE=1 SV=2	39	17	17	101.4	26	914	5.24				9	14	10				9	13	10
High	Q9HD42	Charged multivesicular body protein 1a OS=Homo sapiens OX=9606 GN=CHMP1A PE=1 SV=1	39	6	6	21.7	25	196	8.06	5	4	6	3	3	3	5	4	5	3	3	3
High	O95758	Polypyrimidine tract-binding protein 3 OS=Homo sapiens OX=9606 GN=PTBP3 PE=1 SV=2	39	7	4	59.7	16	552	9.04	3	4	4	4	5	5	3	4	4	3	3	3
High	Q9BXP5	Serrate RNA effector molecule homolog OS=Homo sapiens OX=9606 GN=SRRT PE=1 SV=1	39	10	10	100.6	15	876	5.96	3	2	5	3	4	4	3	2	5	3	4	4
High	Q96IZ0	PRKC apoptosis WT1 regulator protein OS=Homo sapiens OX=9606 GN=PAWR PE=1 SV=1	39	8	8	36.5	43	340	5.41	5	4	7	1	4	1	5	4	5	1	4	1
High	P53814	Smoothelin OS=Homo sapiens OX=9606 GN=SMTN PE=1 SV=7	39	9	9	99	11	917	9.07	4	3	3	3	4	2	4	3	3	3	4	2
High	P01966	SWISS-PROT:P01966 (Bos taurus) Hemoglobin subunit alpha	38	3	1	15.2	17	142	8.44	1	2	5	5	7	9	1	2	2	3	3	3
High	Q96BW5	Phosphotriesterase-related protein OS=Homo sapiens OX=9606 GN=PTER PE=1 SV=1	38	8	8	39	24	349	6.52	4	2	4	6	3	6	4	2	4	6	3	6
High	Q9Y3Z3	Deoxynucleoside triphosphate triphosphohydrolase SAMHD1 OS=Homo sapiens OX=9606 GN=SAMHD1 PE=1 SV=2	38	13	13	72.2	23	626	7.14	2	3	1	8	11	7	2	3	1	8	11	7
High	P49207	60S ribosomal protein L34 OS=Homo sapiens OX=9606 GN=RPL34 PE=1 SV=3	38	6	6	13.3	37	117	11.47	3	3	6	3	3	3	3	3	5	3	3	3
High	O60610	Protein diaphanous homolog 1 OS=Homo sapiens OX=9606 GN=DIAPH1 PE=1 SV=2	38	12	12	141.3	11	1272	5.41	1	3	5		3	1	1	3	5		3	1
High	O14524	Nuclear envelope integral membrane protein 1 OS=Homo sapiens OX=9606 GN=NEMP1 PE=1 SV=2	38	10	10	50.6	19	444	6.93					1	1					1	1
High	O95395	Beta-1,3-galactosyl-O-glycosyl-glycoprotein beta-1,6-N-acetylglucosaminyltransferase 3 OS=Homo sapiens OX=9606 GN=GCNT3 PE=2 SV=1	38	11	11	50.8	33	438	8.25	11	10	10				11	10	10
High	Q4G176	Malonate--CoA ligase ACSF3, mitochondrial OS=Homo sapiens OX=9606 GN=ACSF3 PE=1 SV=3	38	10	10	64.1	22	576	8.37	3		2	4	5	3	3		2	4	5	3
High	Q14166	Tubulin--tyrosine ligase-like protein 12 OS=Homo sapiens OX=9606 GN=TTLL12 PE=1 SV=2	38	9	9	74.4	18	644	5.53	2	3	5	4	3	4	2	3	5	4	3	4
High	O15014	Zinc finger protein 609 OS=Homo sapiens OX=9606 GN=ZNF609 PE=1 SV=2	38	10	10	151.1	11	1411	8.03	2	2	3	3	6	3	2	2	3	3	6	3
High	Q12933	TNF receptor-associated factor 2 OS=Homo sapiens OX=9606 GN=TRAF2 PE=1 SV=2	38	10	10	55.8	23	501	7.53	4	3	4	2	3	1	4	3	4	2	3	1
High	Q96FJ2	Dynein light chain 2, cytoplasmic OS=Homo sapiens OX=9606 GN=DYNLL2 PE=1 SV=1	38	5	2	10.3	58	89	7.37	4	5	5	2	3	2	2	2	3	2	2	2
High	O15269	Serine palmitoyltransferase 1 OS=Homo sapiens OX=9606 GN=SPTLC1 PE=1 SV=1	38	9	9	52.7	25	473	6.01	5	5	4	2	1	1	5	5	4	2	1	1
High	Q9Y6Y0	Influenza virus NS1A-binding protein OS=Homo sapiens OX=9606 GN=IVNS1ABP PE=1 SV=3	38	10	10	71.7	17	642	5.53			1	6	6	6			1	6	6	6
High	P49916	DNA ligase 3 OS=Homo sapiens OX=9606 GN=LIG3 PE=1 SV=2	38	13	13	112.8	15	1009	9.01	2	1	2	2	3		1	1	2	2	3
High	Q16630	Cleavage and polyadenylation specificity factor subunit 6 OS=Homo sapiens OX=9606 GN=CPSF6 PE=1 SV=2	38	8	8	59.2	17	551	7.15	2	3	3	5	5	4	2	3	2	5	5	4
High	P25189	Myelin protein P0 OS=Homo sapiens OX=9606 GN=MPZ PE=1 SV=1	38	6	6	27.5	25	248	9.54				11	15	12				6	6	6
High	Q15646	2'-5'-oligoadenylate synthase-like protein OS=Homo sapiens OX=9606 GN=OASL PE=1 SV=2	38	9	9	59.2	23	514	7.87	2	3	3	3	4	3	2	3	3	3	4	3
High	Q01130	Serine/arginine-rich splicing factor 2 OS=Homo sapiens OX=9606 GN=SRSF2 PE=1 SV=4	38	5	5	25.5	19	221	11.85	3	3	4	3	3	4	3	3	3	3	3	4
High	Q13185	Chromobox protein homolog 3 OS=Homo sapiens OX=9606 GN=CBX3 PE=1 SV=4	37	5	4	20.8	29	183	5.33	5	5	4	3	4	3	4	4	4	3	4	3
High	A0A0B4J2D5	Putative glutamine amidotransferase-like class 1 domain-containing protein 3B, mitochondrial OS=Homo sapiens OX=9606 GN=GATD3B PE=5 SV=1	37	9	9	28.1	56	268	8.27	4	4	4	2	6	2	3	3	4	2	4	2
High	Q99729	Heterogeneous nuclear ribonucleoprotein A/B OS=Homo sapiens OX=9606 GN=HNRNPAB PE=1 SV=2	37	6	5	36.2	21	332	8.21	6	5	5	3	3	3	5	4	4	2	2	2
High	P51532	Transcription activator BRG1 OS=Homo sapiens OX=9606 GN=SMARCA4 PE=1 SV=2	37	12	9	184.5	8	1647	7.88	1	2	4	3	3	4	1	2	4	3	3	4
High	O00629	Importin subunit alpha-3 OS=Homo sapiens OX=9606 GN=KPNA4 PE=1 SV=1	37	9	6	57.9	27	521	4.96		2	3	3	3	2		2	3	3	3	2
High	Q16531	DNA damage-binding protein 1 OS=Homo sapiens OX=9606 GN=DDB1 PE=1 SV=1	37	15	15	126.9	14	1140	5.26	1	3	1	8	5	8	1	3	1	8	5	8
High	P04626	Receptor tyrosine-protein kinase erbB-2 OS=Homo sapiens OX=9606 GN=ERBB2 PE=1 SV=1	37	14	13	137.8	15	1255	5.91	9	10	9				8	9	9
High	Q92888	Rho guanine nucleotide exchange factor 1 OS=Homo sapiens OX=9606 GN=ARHGEF1 PE=1 SV=2	37	10	10	102.4	14	912	5.66	6	5	6	1	1	1	6	5	6	1	1	1
High	P42677	40S ribosomal protein S27 OS=Homo sapiens OX=9606 GN=RPS27 PE=1 SV=3	37	4	1	9.5	39	84	9.45	2	4	1	4	4	4	2	3	1	3	3	3
High	Q14694	Ubiquitin carboxyl-terminal hydrolase 10 OS=Homo sapiens OX=9606 GN=USP10 PE=1 SV=2	37	11	11	87.1	20	798	5.31	3	1	2	2	7	2	3	1	2	2	7	2
High	P46779	60S ribosomal protein L28 OS=Homo sapiens OX=9606 GN=RPL28 PE=1 SV=3	37	4	4	15.7	28	137	12.02	4	3	4	4	4	3	3	3	4	3	3	2
High	P40939	Trifunctional enzyme subunit alpha, mitochondrial OS=Homo sapiens OX=9606 GN=HADHA PE=1 SV=2	37	11	11	82.9	21	763	9.04	4	3	2	4	5	5	4	3	2	4	5	5
High	Q14684	Ribosomal RNA processing protein 1 homolog B OS=Homo sapiens OX=9606 GN=RRP1B PE=1 SV=3	37	11	11	84.4	22	758	9.76			1	3	6	5			1	3	6	5
High	Q96RQ3	Methylcrotonoyl-CoA carboxylase subunit alpha, mitochondrial OS=Homo sapiens OX=9606 GN=MCCC1 PE=1 SV=3	37	8	8	80.4	17	725	7.78	5	5	6	2	3	2	5	4	6	2	3	2
High	P50570	Dynamin-2 OS=Homo sapiens OX=9606 GN=DNM2 PE=1 SV=2	37	11	6	98	15	870	7.44	8	6	6			2	8	6	6			2
High	Q9BW92	Threonine--tRNA ligase, mitochondrial OS=Homo sapiens OX=9606 GN=TARS2 PE=1 SV=1	37	9	9	81	13	718	7.3	1	2	3	1	6	4	1	2	3	1	6	4
High	Q01081	Splicing factor U2AF 35 kDa subunit OS=Homo sapiens OX=9606 GN=U2AF1 PE=1 SV=3	37	6	6	27.9	29	240	8.81	3	4	3	4	4	4	3	4	3	4	4	4
High	O95347	Structural maintenance of chromosomes protein 2 OS=Homo sapiens OX=9606 GN=SMC2 PE=1 SV=2	37	10	10	135.6	9	1197	8.43	2	3	6	3	4	3	2	3	6	3	4	3
High	Q15029	116 kDa U5 small nuclear ribonucleoprotein component OS=Homo sapiens OX=9606 GN=EFTUD2 PE=1 SV=1	37	11	10	109.4	17	972	5	6	4	5	3	2	1	5	3	5	3	2	1
High	O95336	6-phosphogluconolactonase OS=Homo sapiens OX=9606 GN=PGLS PE=1 SV=2	37	8	8	27.5	44	258	6.05	3	3	4	1	3	2	3	3	3	1	3	2
High	P43487	Ran-specific GTPase-activating protein OS=Homo sapiens OX=9606 GN=RANBP1 PE=1 SV=1	36	6	6	23.3	52	201	5.29	3	3	5	3	4	3	3	3	3	3	3	3
High	Q00535	Cyclin-dependent-like kinase 5 OS=Homo sapiens OX=9606 GN=CDK5 PE=1 SV=3	36	6	5	33.3	27	292	7.66	3	6	6	3	4	2	3	4	5	2	3	2
High	Q16555	Dihydropyrimidinase-related protein 2 OS=Homo sapiens OX=9606 GN=DPYSL2 PE=1 SV=1	36	9	9	62.3	22	572	6.38	4	3	3	5	3	5	4	3	3	5	3	5
High	Q9UN86	Ras GTPase-activating protein-binding protein 2 OS=Homo sapiens OX=9606 GN=G3BP2 PE=1 SV=2	36	8	8	54.1	20	482	5.55	2	2	2	5	6	5	2	2	2	5	6	5
High	P61006	Ras-related protein Rab-8A OS=Homo sapiens OX=9606 GN=RAB8A PE=1 SV=1	36	4	1	23.7	21	207	9.07	4	6	4	3	4	3	3	4	3	3	3	3
High	O00139	Kinesin-like protein KIF2A OS=Homo sapiens OX=9606 GN=KIF2A PE=1 SV=3	36	10	9	79.9	14	706	6.68	2		2	5	3	4	2		2	5	3	4
High	P13987	CD59 glycoprotein OS=Homo sapiens OX=9606 GN=CD59 PE=1 SV=1	36	4	4	14.2	25	128	6.48	5	5	4	2	2	2	4	4	3	2	2	2
High	P62081	40S ribosomal protein S7 OS=Homo sapiens OX=9606 GN=RPS7 PE=1 SV=1	36	6	6	22.1	36	194	10.1	6	6	5	4	1	3	5	5	4	3	1	3
High	P26639	Threonine--tRNA ligase 1, cytoplasmic OS=Homo sapiens OX=9606 GN=TARS1 PE=1 SV=3	36	11	11	83.4	18	723	6.67	4	4	4		1	3	4	4	4		1	3
High	Q3ZBS7	TREMBL:Q3ZBS7 (Bos taurus) Vitronectin	36	7	7	54.1	15	484	6.16	8	6	8	1	2	2	7	6	6	1	2	2
High	Q96EY7	Pentatricopeptide repeat domain-containing protein 3, mitochondrial OS=Homo sapiens OX=9606 GN=PTCD3 PE=1 SV=3	36	9	9	78.5	18	689	6.42	4	2	4	2	4	2	4	2	4	2	3	2
High	P10916	Myosin regulatory light chain 2, ventricular/cardiac muscle isoform OS=Homo sapiens OX=9606 GN=MYL2 PE=1 SV=3	36	9	9	18.8	52	166	5	5	4	4	6	2	6	4	4	4	6	2	6
High	Q01518	Adenylyl cyclase-associated protein 1 OS=Homo sapiens OX=9606 GN=CAP1 PE=1 SV=5	36	8	8	51.9	23	475	8.06	5	3	4	5	3	3	5	3	4	4	3	3
High	Q9NVX2	Notchless protein homolog 1 OS=Homo sapiens OX=9606 GN=NLE1 PE=1 SV=4	36	6	6	53.3	14	485	7.34	3	2	3	5	4	4	3	2	3	5	4	4
High	Q9UBN7	Histone deacetylase 6 OS=Homo sapiens OX=9606 GN=HDAC6 PE=1 SV=2	36	7	7	131.3	8	1215	5.3	3	3	3	3	4	4	3	3	3	3	3	4
High	O15042	U2 snRNP-associated SURP motif-containing protein OS=Homo sapiens OX=9606 GN=U2SURP PE=1 SV=2	36	10	10	118.2	14	1029	8.47	3	3	2	3	5	3	3	3	2	3	5	3
High	P29966	Myristoylated alanine-rich C-kinase substrate OS=Homo sapiens OX=9606 GN=MARCKS PE=1 SV=4	36	5	5	31.5	23	332	4.45	5	5	4	2	2	3	5	5	4	2	2	3
High	Q13228	Methanethiol oxidase OS=Homo sapiens OX=9606 GN=SELENBP1 PE=1 SV=2	35	11	11	52.4	24	472	6.37	3	3	3	3	6	5	3	3	2	3	6	5
High	P28074	Proteasome subunit beta type-5 OS=Homo sapiens OX=9606 GN=PSMB5 PE=1 SV=3	35	7	7	28.5	31	263	6.92	1	2	1	8	5	6	1	2	1	7	5	6
High	Q8TAQ2	SWI/SNF complex subunit SMARCC2 OS=Homo sapiens OX=9606 GN=SMARCC2 PE=1 SV=1	35	10	8	132.8	13	1214	5.69	2	1		1	3	3	2	1		1	3	3
High	Q9Y224	RNA transcription, translation and transport factor protein OS=Homo sapiens OX=9606 GN=RTRAF PE=1 SV=1	35	7	7	28.1	30	244	6.65	3	3	5	3	5	3	3	3	5	3	4	3
High	Q15758	Neutral amino acid transporter B(0) OS=Homo sapiens OX=9606 GN=SLC1A5 PE=1 SV=2	35	7	7	56.6	18	541	5.48	5	7	6	2	3	1	5	6	6	2	3	1
High	Q99848	Probable rRNA-processing protein EBP2 OS=Homo sapiens OX=9606 GN=EBNA1BP2 PE=1 SV=2	35	8	8	34.8	29	306	10.1	1	1	2	5	3	6	1	1	2	5	3	6
High	Q9H3K6	BolA-like protein 2 OS=Homo sapiens OX=9606 GN=BOLA2 PE=1 SV=1	35	4	4	10.1	62	86	6.52	3	5	4	4	4	2	3	4	4	3	3	2
High	A0AV96	RNA-binding protein 47 OS=Homo sapiens OX=9606 GN=RBM47 PE=1 SV=2	35	9	9	64.1	19	593	7.68	1	1		3	3	3	1	1		3	3	3
High	Q9Y4W6	AFG3-like protein 2 OS=Homo sapiens OX=9606 GN=AFG3L2 PE=1 SV=2	35	14	14	88.5	18	797	8.66	5	6	8	1	1		5	6	8	1	1
High	Q9Y678	Coatomer subunit gamma-1 OS=Homo sapiens OX=9606 GN=COPG1 PE=1 SV=1	35	10	10	97.7	15	874	5.47	3	3	7	2	1	2	3	3	5	2	1	2
High	Q9UHV9	Prefoldin subunit 2 OS=Homo sapiens OX=9606 GN=PFDN2 PE=1 SV=1	35	5	5	16.6	36	154	6.58	2	1	3	4	5	5	2	1	3	3	4	4
High	Q96RP9	Elongation factor G, mitochondrial OS=Homo sapiens OX=9606 GN=GFM1 PE=1 SV=2	35	10	10	83.4	17	751	7.01	2	2	2	2	3	3	2	2	2	2	3	3
High	Q99426	Tubulin-folding cofactor B OS=Homo sapiens OX=9606 GN=TBCB PE=1 SV=2	35	5	5	27.3	23	244	5.15	4	4	4	4	5	4	4	4	3	4	5	4
High	Q15477	Helicase SKI2W OS=Homo sapiens OX=9606 GN=SKIV2L PE=1 SV=3	35	14	14	137.7	16	1246	6.06	9	8	9	1		1	9	8	9	1		1
High	P55884	Eukaryotic translation initiation factor 3 subunit B OS=Homo sapiens OX=9606 GN=EIF3B PE=1 SV=3	35	8	8	92.4	12	814	5	5	4	4	2	2	2	5	4	4	2	2	2
High	Q92769	Histone deacetylase 2 OS=Homo sapiens OX=9606 GN=HDAC2 PE=1 SV=2	35	7	3	55.3	19	488	5.91	3	2	3	1	6	4	3	2	3	1	4	3
High	P49790	Nuclear pore complex protein Nup153 OS=Homo sapiens OX=9606 GN=NUP153 PE=1 SV=2	35	18	18	153.8	16	1475	8.73				1	1	2				1	1	2
High	Q96CN7	Isochorismatase domain-containing protein 1 OS=Homo sapiens OX=9606 GN=ISOC1 PE=1 SV=3	35	7	7	32.2	32	298	7.39	4	4	4	3	5	4	4	4	4	3	5	4
High	Q9H4G0	Band 4.1-like protein 1 OS=Homo sapiens OX=9606 GN=EPB41L1 PE=1 SV=2	35	13	13	98.4	20	881	5.62	5	6	6		2		5	6	6		2
High	Q2TAA2	Isoamyl acetate-hydrolyzing esterase 1 homolog OS=Homo sapiens OX=9606 GN=IAH1 PE=1 SV=1	34	6	6	27.6	31	248	5.3	4	4	2	3	3	2	4	4	2	3	3	2
High	P63220	40S ribosomal protein S21 OS=Homo sapiens OX=9606 GN=RPS21 PE=1 SV=1	34	5	5	9.1	59	83	8.5	4	3	2	2	5	3	3	3	2	2	5	3
High	Q8IX04	Ubiquitin-conjugating enzyme E2 variant 3 OS=Homo sapiens OX=9606 GN=UEVLD PE=1 SV=2	34	7	7	52.2	19	471	7.09	3	4	5	3	3	4	3	4	5	3	3	4
High	P07858	Cathepsin B OS=Homo sapiens OX=9606 GN=CTSB PE=1 SV=3	34	5	5	37.8	15	339	6.3	5	3	5	4	3	3	4	3	5	4	3	3
High	Q9Y3D2	Methionine-R-sulfoxide reductase B2, mitochondrial OS=Homo sapiens OX=9606 GN=MSRB2 PE=1 SV=2	34	6	6	19.5	51	182	8.63	1	1	2	2	6	3	1	1	2	2	4	3
High	Q99623	Prohibitin-2 OS=Homo sapiens OX=9606 GN=PHB2 PE=1 SV=2	34	8	8	33.3	31	299	9.83	4	3	4	2	3	2	4	3	4	2	2	2
High	P21980	Protein-glutamine gamma-glutamyltransferase 2 OS=Homo sapiens OX=9606 GN=TGM2 PE=1 SV=2	34	11	11	77.3	20	687	5.22	1	3	1	6	8	7	1	3	1	6	8	7
High	P26447	Protein S100-A4 OS=Homo sapiens OX=9606 GN=S100A4 PE=1 SV=1	34	3	3	11.7	28	101	6.11	4	5	4	2	2	2	3	3	3	2	2	2
High	Q8NEZ5	F-box only protein 22 OS=Homo sapiens OX=9606 GN=FBXO22 PE=1 SV=1	34	7	7	44.5	19	403	7.03	5	4	4	4	3	3	4	3	4	4	3	3
High	P49588	Alanine--tRNA ligase, cytoplasmic OS=Homo sapiens OX=9606 GN=AARS1 PE=1 SV=2	34	14	14	106.7	21	968	5.53	2	3	9	1	1		2	3	8	1	1
High	Q3ZCQ8	Mitochondrial import inner membrane translocase subunit TIM50 OS=Homo sapiens OX=9606 GN=TIMM50 PE=1 SV=2	34	8	8	39.6	27	353	8.37	5	5	5	1	1	1	5	5	5	1	1	1
High	Q9UK41	Vacuolar protein sorting-associated protein 28 homolog OS=Homo sapiens OX=9606 GN=VPS28 PE=1 SV=1	34	8	8	25.4	49	221	5.54	1	3	5	3	4	3	1	3	5	3	3	3
High	Q01780	Exosome component 10 OS=Homo sapiens OX=9606 GN=EXOSC10 PE=1 SV=2	34	9	9	100.8	10	885	8.46				5	5	4				5	5	4
High	Q8IY21	Probable ATP-dependent RNA helicase DDX60 OS=Homo sapiens OX=9606 GN=DDX60 PE=1 SV=3	34	13	13	197.7	9	1712	7.59		1	1	6	8	6		1	1	6	8	6
High	P50579	Methionine aminopeptidase 2 OS=Homo sapiens OX=9606 GN=METAP2 PE=1 SV=1	34	2	2	52.9	9	478	5.82	7	8	3		1	1	2	2	2		1	1
High	O14933	Ubiquitin/ISG15-conjugating enzyme E2 L6 OS=Homo sapiens OX=9606 GN=UBE2L6 PE=1 SV=4	34	5	5	17.8	41	153	7.88	4	3	4	3	4	3	3	3	2	1	2	2
High	Q12769	Nuclear pore complex protein Nup160 OS=Homo sapiens OX=9606 GN=NUP160 PE=1 SV=3	33	13	13	162	11	1436	5.5	2	4	3		1		2	4	3		1
High	P05026	Sodium/potassium-transporting ATPase subunit beta-1 OS=Homo sapiens OX=9606 GN=ATP1B1 PE=1 SV=1	33	6	6	35	25	303	8.53	3	2	5	1	2	3	3	2	4	1	2	3
High	P13667	Protein disulfide-isomerase A4 OS=Homo sapiens OX=9606 GN=PDIA4 PE=1 SV=2	33	9	9	72.9	20	645	5.07	7	8	7				4	5	6
High	P18669	Phosphoglycerate mutase 1 OS=Homo sapiens OX=9606 GN=PGAM1 PE=1 SV=2	33	7	7	28.8	38	254	7.18	5	4	5	1	1		5	4	5	1	1
High	P54819	Adenylate kinase 2, mitochondrial OS=Homo sapiens OX=9606 GN=AK2 PE=1 SV=2	33	7	7	26.5	33	239	7.81	2	3	1	3	4	3	2	3	1	3	4	3
High	Q8IWX8	Calcium homeostasis endoplasmic reticulum protein OS=Homo sapiens OX=9606 GN=CHERP PE=1 SV=3	33	8	8	103.6	9	916	9.04	4	2	1	3	3	2	4	2	1	3	3	2
High	Q14134	Tripartite motif-containing protein 29 OS=Homo sapiens OX=9606 GN=TRIM29 PE=1 SV=2	33	14	14	65.8	24	588	7.15	9	10	10	1	1	1	8	9	10	1	1	1
High	P28066	Proteasome subunit alpha type-5 OS=Homo sapiens OX=9606 GN=PSMA5 PE=1 SV=3	33	5	5	26.4	29	241	4.79	3	3	4	3	3	4	3	3	4	3	3	4
High	Q9UHB9	Signal recognition particle subunit SRP68 OS=Homo sapiens OX=9606 GN=SRP68 PE=1 SV=2	33	13	13	70.7	21	627	8.56			2	2	1	1			2	2	1	1
High	O76094	Signal recognition particle subunit SRP72 OS=Homo sapiens OX=9606 GN=SRP72 PE=1 SV=3	33	14	14	74.6	24	671	9.26	1	1	1	3	3	2	1	1	1	3	3	2
High	P49023	Paxillin OS=Homo sapiens OX=9606 GN=PXN PE=1 SV=3	33	8	8	64.5	16	591	6.19	4	3	4	3	2	3	4	3	4	3	2	3
High	Q9HCY8	Protein S100-A14 OS=Homo sapiens OX=9606 GN=S100A14 PE=1 SV=1	33	5	5	11.7	63	104	5.24	5	3	4	2	1	1	4	3	4	2	1	1
High	Q15418	Ribosomal protein S6 kinase alpha-1 OS=Homo sapiens OX=9606 GN=RPS6KA1 PE=1 SV=2	33	7	3	82.7	10	735	7.83	2	2	4	4	3	2	2	2	4	3	2	2
High	O15143	Actin-related protein 2/3 complex subunit 1B OS=Homo sapiens OX=9606 GN=ARPC1B PE=1 SV=3	33	6	6	40.9	17	372	8.35	4	6	4	4	3	3	4	5	4	4	3	3
High	P13533	Myosin-6 OS=Homo sapiens OX=9606 GN=MYH6 PE=1 SV=5	33	14	9	223.6	9	1939	5.73	3	4	4	6	6	5	3	3	2	6	6	5
High	Q15286	Ras-related protein Rab-35 OS=Homo sapiens OX=9606 GN=RAB35 PE=1 SV=1	33	4	2	23	22	201	8.29	4	5	4	2	3	2	3	3	3	2	2	2
High	P06731	Carcinoembryonic antigen-related cell adhesion molecule 5 OS=Homo sapiens OX=9606 GN=CEACAM5 PE=1 SV=4	32	6	4	76.7	13	702	5.69	4	4	4	2	2	1	4	4	4	2	2	1
High	P35251	Replication factor C subunit 1 OS=Homo sapiens OX=9606 GN=RFC1 PE=1 SV=4	32	11	11	128.2	11	1148	9.36	3	2	4	3	3	2	3	2	4	3	3	2
High	Q96EY1	DnaJ homolog subfamily A member 3, mitochondrial OS=Homo sapiens OX=9606 GN=DNAJA3 PE=1 SV=2	32	6	6	52.5	19	480	9.26	5	3	4	1	1	1	5	3	4	1	1	1
High	P55072	Transitional endoplasmic reticulum ATPase OS=Homo sapiens OX=9606 GN=VCP PE=1 SV=4	32	12	12	89.3	19	806	5.26	4	6	4	1	2	2	4	6	4	1	2	2
High	Q92522	Histone H1.10 OS=Homo sapiens OX=9606 GN=H1-10 PE=1 SV=1	32	5	5	22.5	23	213	10.76		2	4	5	3	2		2	4	4	3	2
High	Q9NQ29	Putative RNA-binding protein Luc7-like 1 OS=Homo sapiens OX=9606 GN=LUC7L PE=1 SV=1	32	5	1	43.7	17	371	9.92	3	3	2	3	3	4	2	2	2	3	3	3
High	Q9Y4P3	Transducin beta-like protein 2 OS=Homo sapiens OX=9606 GN=TBL2 PE=1 SV=1	32	9	9	49.8	25	447	9.44	2	3	2	3	6	4	2	3	2	3	5	4
High	P20618	Proteasome subunit beta type-1 OS=Homo sapiens OX=9606 GN=PSMB1 PE=1 SV=2	32	6	6	26.5	32	241	8.13	2	2	2	5	5	6	2	2	2	5	3	6
High	Q8TDN6	Ribosome biogenesis protein BRX1 homolog OS=Homo sapiens OX=9606 GN=BRIX1 PE=1 SV=2	32	12	12	41.4	38	353	9.92	3	3	1	3	6	2	3	3	1	3	6	2
High	Q8IZW8	Tensin-4 OS=Homo sapiens OX=9606 GN=TNS4 PE=1 SV=3	32	9	9	76.7	17	715	7.34	4	3	2	5	6	5	4	3	2	5	6	5
High	O00232	26S proteasome non-ATPase regulatory subunit 12 OS=Homo sapiens OX=9606 GN=PSMD12 PE=1 SV=3	32	8	8	52.9	22	456	7.65	2	1	3	1	7	1	2	1	3	1	6	1
High	P28482	Mitogen-activated protein kinase 1 OS=Homo sapiens OX=9606 GN=MAPK1 PE=1 SV=3	32	7	4	41.4	23	360	6.98		1	3	3	2	4		1	3	3	2	4
High	P21359	Neurofibromin OS=Homo sapiens OX=9606 GN=NF1 PE=1 SV=2	32	16	16	319.2	7	2839	7.39	7	7	10				7	7	10
High	P33527	Multidrug resistance-associated protein 1 OS=Homo sapiens OX=9606 GN=ABCC1 PE=1 SV=3	32	11	9	171.5	8	1531	7.11	5	6	9			2	5	5	8			2
High	P05161	Ubiquitin-like protein ISG15 OS=Homo sapiens OX=9606 GN=ISG15 PE=1 SV=5	32	4	4	17.9	30	165	7.44	3	3	3	4	5	2	3	3	3	4	4	2
High	Q9NVI7	ATPase family AAA domain-containing protein 3A OS=Homo sapiens OX=9606 GN=ATAD3A PE=1 SV=2	32	8	8	71.3	12	634	8.98	2	2	3	1	3	2	2	2	3	1	3	2
High	P63151	Serine/threonine-protein phosphatase 2A 55 kDa regulatory subunit B alpha isoform OS=Homo sapiens OX=9606 GN=PPP2R2A PE=1 SV=1	32	7	7	51.7	21	447	6.2	5	4	2	4	3	4	5	4	2	4	3	4
High	Q9BUH6	Protein PAXX OS=Homo sapiens OX=9606 GN=PAXX PE=1 SV=2	31	6	6	21.6	33	204	5.48	3	3	3	3	3	3	3	3	3	3	3	3
High	Q14192	Four and a half LIM domains protein 2 OS=Homo sapiens OX=9606 GN=FHL2 PE=1 SV=3	31	10	10	32.2	41	279	7.55			1	2	3	6			1	2	3	6
High	Q9BZE4	GTP-binding protein 4 OS=Homo sapiens OX=9606 GN=GTPBP4 PE=1 SV=3	31	12	12	73.9	18	634	9.5		1		3	5	4		1		3	5	4
High	P04792	Heat shock protein beta-1 OS=Homo sapiens OX=9606 GN=HSPB1 PE=1 SV=2	31	7	7	22.8	39	205	6.4	2	3	2	3	4	2	2	3	2	3	4	2
High	O00161	Synaptosomal-associated protein 23 OS=Homo sapiens OX=9606 GN=SNAP23 PE=1 SV=1	31	10	10	23.3	62	211	5.01	2	1	3		1		2	1	2		1
High	Q8TCJ2	Dolichyl-diphosphooligosaccharide--protein glycosyltransferase subunit STT3B OS=Homo sapiens OX=9606 GN=STT3B PE=1 SV=1	31	9	8	93.6	10	826	8.91	3	5	5	1	1	2	2	4	4	1	1	2
High	P62316	Small nuclear ribonucleoprotein Sm D2 OS=Homo sapiens OX=9606 GN=SNRPD2 PE=1 SV=1	31	6	6	13.5	56	118	9.91	4	3	2	3	2	4	4	3	2	3	2	4
High	Q8TDB6	E3 ubiquitin-protein ligase DTX3L OS=Homo sapiens OX=9606 GN=DTX3L PE=1 SV=1	31	9	9	83.5	16	740	8.06	4	3	4	4	4	3	4	3	4	4	4	3
High	P49959	Double-strand break repair protein MRE11 OS=Homo sapiens OX=9606 GN=MRE11 PE=1 SV=3	31	11	11	80.5	20	708	5.9	2	4	4	1	1	2	2	4	4	1	1	2
High	Q13619	Cullin-4A OS=Homo sapiens OX=9606 GN=CUL4A PE=1 SV=3	31	12	12	87.6	16	759	8.13	7	8	3		3	1	7	8	3		3	1
High	Q16831	Uridine phosphorylase 1 OS=Homo sapiens OX=9606 GN=UPP1 PE=1 SV=1	31	7	7	33.9	22	310	7.88	1		1	6	5	6	1		1	6	5	5
High	Q13136	Liprin-alpha-1 OS=Homo sapiens OX=9606 GN=PPFIA1 PE=1 SV=1	31	11	11	135.7	13	1202	6.29	5	6	4		1		5	6	4		1
High	Q96CU9	FAD-dependent oxidoreductase domain-containing protein 1 OS=Homo sapiens OX=9606 GN=FOXRED1 PE=1 SV=2	31	7	7	53.8	19	486	7.78		2	3	3	3	3		2	3	3	3	3
High	P62851	40S ribosomal protein S25 OS=Homo sapiens OX=9606 GN=RPS25 PE=1 SV=1	31	4	4	13.7	28	125	10.11	3	4	3	4	4	4	3	4	3	4	4	4
High	P11177	Pyruvate dehydrogenase E1 component subunit beta, mitochondrial OS=Homo sapiens OX=9606 GN=PDHB PE=1 SV=3	31	9	9	39.2	31	359	6.65	3	5	1		1	1	3	3	1		1	1
High	P43490	Nicotinamide phosphoribosyltransferase OS=Homo sapiens OX=9606 GN=NAMPT PE=1 SV=1	31	9	9	55.5	26	491	7.15	6	5	8	1	3	1	6	5	8	1	3	1
High	Q7LBC6	Lysine-specific demethylase 3B OS=Homo sapiens OX=9606 GN=KDM3B PE=1 SV=2	31	12	12	191.5	9	1761	7.18	1	1		1	4		1	1		1	4
High	Q9H936	Mitochondrial glutamate carrier 1 OS=Homo sapiens OX=9606 GN=SLC25A22 PE=1 SV=1	31	7	7	34.4	21	323	9.29	6	5	3	1	2	1	6	5	3	1	2	1
High	Q9NZN4	EH domain-containing protein 2 OS=Homo sapiens OX=9606 GN=EHD2 PE=1 SV=2	31	9	7	61.1	19	543	6.46	6	6	4	2	3	3	6	6	4	2	3	3
High	O43852	Calumenin OS=Homo sapiens OX=9606 GN=CALU PE=1 SV=2	31	11	11	37.1	47	315	4.64	7	7	6	2	4	2	7	7	6	2	3	2
High	Q7Z5J4	Retinoic acid-induced protein 1 OS=Homo sapiens OX=9606 GN=RAI1 PE=1 SV=2	31	12	12	203.2	11	1906	8.79		1	1	5	6	7		1	1	5	6	6
High	P62995	Transformer-2 protein homolog beta OS=Homo sapiens OX=9606 GN=TRA2B PE=1 SV=1	31	5	5	33.6	22	288	11.25	3	4	6	3	3	2	3	3	5	3	3	2
High	O95049	Tight junction protein ZO-3 OS=Homo sapiens OX=9606 GN=TJP3 PE=1 SV=3	31	10	10	101.3	13	919	6.76	5	4	4	1	2	1	5	4	4	1	2	1
High	Q14203	Dynactin subunit 1 OS=Homo sapiens OX=9606 GN=DCTN1 PE=1 SV=3	30	10	10	141.6	12	1278	5.81	4	3	5	2		1	4	3	5	2		1
High	P24941	Cyclin-dependent kinase 2 OS=Homo sapiens OX=9606 GN=CDK2 PE=1 SV=2	30	5	3	33.9	17	298	8.68	2	4	5	2	4	2	2	3	4	1	3	2
High	Q8IYB3	Serine/arginine repetitive matrix protein 1 OS=Homo sapiens OX=9606 GN=SRRM1 PE=1 SV=2	30	8	8	102.3	14	904	11.84	1	1	2	4	4	4	1	1	2	4	4	4
High	P62277	40S ribosomal protein S13 OS=Homo sapiens OX=9606 GN=RPS13 PE=1 SV=2	30	5	5	17.2	30	151	10.54	3	4	4	3	3	3	3	4	4	3	3	3
High	Q15370	Elongin-B OS=Homo sapiens OX=9606 GN=ELOB PE=1 SV=1	30	5	5	13.1	49	118	4.88	4	3	3	2	4	2	3	3	3	2	4	2
High	Q9NTJ3	Structural maintenance of chromosomes protein 4 OS=Homo sapiens OX=9606 GN=SMC4 PE=1 SV=2	30	10	10	147.1	9	1288	6.79	4	4	4	2	1	2	4	4	4	2	1	2
High	Q4G0J3	La-related protein 7 OS=Homo sapiens OX=9606 GN=LARP7 PE=1 SV=1	30	8	8	66.9	17	582	9.55	1	2	1	2	2	2	1	2	1	2	2	2
High	Q9UMS4	Pre-mRNA-processing factor 19 OS=Homo sapiens OX=9606 GN=PRPF19 PE=1 SV=1	30	7	7	55.1	17	504	6.61	1	1	1	6	4	5	1	1	1	6	3	5
High	Q9HAN9	Nicotinamide/nicotinic acid mononucleotide adenylyltransferase 1 OS=Homo sapiens OX=9606 GN=NMNAT1 PE=1 SV=1	30	6	6	31.9	29	279	8.87	2	1	2	3	2	4	2	1	2	3	2	3
High	O94901	SUN domain-containing protein 1 OS=Homo sapiens OX=9606 GN=SUN1 PE=1 SV=4	30	11	11	87.1	17	785	6.93	6	7	5	1	2	1	5	6	5	1	2	1
High	O00231	26S proteasome non-ATPase regulatory subunit 11 OS=Homo sapiens OX=9606 GN=PSMD11 PE=1 SV=3	30	12	12	47.4	33	422	6.48		2	1	4	3	5		2	1	4	3	5
High	P55769	NHP2-like protein 1 OS=Homo sapiens OX=9606 GN=SNU13 PE=1 SV=3	30	5	5	14.2	46	128	8.46	2	2	3	4	4	4	2	2	3	3	3	3
High	Q8IWS0	PHD finger protein 6 OS=Homo sapiens OX=9606 GN=PHF6 PE=1 SV=1	30	4	4	41.3	13	365	8.68	3	2	3	3	4	3	3	2	3	3	4	3
High	Q9NZ08	Endoplasmic reticulum aminopeptidase 1 OS=Homo sapiens OX=9606 GN=ERAP1 PE=1 SV=3	30	11	11	107.2	16	941	6.46	7	10	9	1		1	7	9	9	1		1
High	Q9ULX6	A-kinase anchor protein 8-like OS=Homo sapiens OX=9606 GN=AKAP8L PE=1 SV=4	30	6	6	71.6	13	646	5.05	7	7	6				6	6	5
High	P27824	Calnexin OS=Homo sapiens OX=9606 GN=CANX PE=1 SV=2	30	12	12	67.5	24	592	4.6	3	7	3				3	6	3
High	Q86V81	THO complex subunit 4 OS=Homo sapiens OX=9606 GN=ALYREF PE=1 SV=3	30	4	4	26.9	23	257	11.15	3	3	2	2	4	2	3	3	2	2	3	2
High	Q9NX58	Cell growth-regulating nucleolar protein OS=Homo sapiens OX=9606 GN=LYAR PE=1 SV=3	30	8	8	43.6	25	379	9.57	1	1	2	2	4	3	1	1	2	2	3	3
High	P21589	5'-nucleotidase OS=Homo sapiens OX=9606 GN=NT5E PE=1 SV=1	30	10	10	63.3	24	574	7.03	1		3		1		1		3		1
High	Q92600	CCR4-NOT transcription complex subunit 9 OS=Homo sapiens OX=9606 GN=CNOT9 PE=1 SV=1	30	7	7	33.6	24	299	8.03			4	2	3	3			4	2	3	3
High	Q9Y277	Voltage-dependent anion-selective channel protein 3 OS=Homo sapiens OX=9606 GN=VDAC3 PE=1 SV=1	30	5	4	30.6	19	283	8.66	1	3	2	1	3	3	1	3	2	1	3	3
High	P56537	Eukaryotic translation initiation factor 6 OS=Homo sapiens OX=9606 GN=EIF6 PE=1 SV=1	30	5	5	26.6	36	245	4.68	3	1	3	3	3	3	3	1	3	3	3	3
High	P35611	Alpha-adducin OS=Homo sapiens OX=9606 GN=ADD1 PE=1 SV=2	30	10	10	80.9	17	737	5.83	3	1	4	2	1	4	3	1	4	2	1	4
High	O15212	Prefoldin subunit 6 OS=Homo sapiens OX=9606 GN=PFDN6 PE=1 SV=1	30	4	4	14.6	36	129	8.88	2	2	2	4	4	3	2	2	2	2	2	2
High	P61026	Ras-related protein Rab-10 OS=Homo sapiens OX=9606 GN=RAB10 PE=1 SV=1	29	5	3	22.5	32	200	8.38	4	5	3	2	3	2	3	3	2	2	2	2
High	P29692	Elongation factor 1-delta OS=Homo sapiens OX=9606 GN=EEF1D PE=1 SV=5	29	9	8	31.1	43	281	5.01	3	3	2	3	3	2	3	2	2	3	3	2
High	P54578	Ubiquitin carboxyl-terminal hydrolase 14 OS=Homo sapiens OX=9606 GN=USP14 PE=1 SV=3	29	9	9	56	23	494	5.3	4	1	2	1	2	2	4	1	2	1	2	2
High	P07305	Histone H1.0 OS=Homo sapiens OX=9606 GN=H1-0 PE=1 SV=3	29	5	5	20.9	21	194	10.84	3	1	3	3	1	4	3	1	3	2	1	3
High	Q15067	Peroxisomal acyl-coenzyme A oxidase 1 OS=Homo sapiens OX=9606 GN=ACOX1 PE=1 SV=3	29	9	9	74.4	21	660	8.16	4	3	3		3	2	4	3	3		3	2
High	O95292	Vesicle-associated membrane protein-associated protein B/C OS=Homo sapiens OX=9606 GN=VAPB PE=1 SV=3	29	5	4	27.2	29	243	7.3	2	2	4	2	1	4	2	2	4	2	1	4
High	Q9H0U3	Magnesium transporter protein 1 OS=Homo sapiens OX=9606 GN=MAGT1 PE=1 SV=1	29	5	5	38	15	335	9.63	4	4	5	3	2	3	4	4	4	3	2	3
High	Q86VM9	Zinc finger CCCH domain-containing protein 18 OS=Homo sapiens OX=9606 GN=ZC3H18 PE=1 SV=2	29	9	9	106.3	12	953	8.32			1	4	3	5			1	4	3	5
High	P26640	Valine--tRNA ligase OS=Homo sapiens OX=9606 GN=VARS1 PE=1 SV=4	29	9	9	140.4	11	1264	7.59	2	3	3	2	3	2	2	3	3	2	3	2
High	Q5MNZ6	WD repeat domain phosphoinositide-interacting protein 3 OS=Homo sapiens OX=9606 GN=WDR45B PE=1 SV=2	29	5	5	38.1	16	344	7.59	2	3	2	3	3	3	2	3	2	3	3	3
High	P59998	Actin-related protein 2/3 complex subunit 4 OS=Homo sapiens OX=9606 GN=ARPC4 PE=1 SV=3	29	4	4	19.7	23	168	8.43	3	3	3	3	3	3	3	3	3	3	3	3
High	Q12904	Aminoacyl tRNA synthase complex-interacting multifunctional protein 1 OS=Homo sapiens OX=9606 GN=AIMP1 PE=1 SV=2	29	6	6	34.3	28	312	8.43	4	4	4	1	2	2	3	3	3	1	2	2
High	Q96N67	Dedicator of cytokinesis protein 7 OS=Homo sapiens OX=9606 GN=DOCK7 PE=1 SV=4	29	10	10	242.4	6	2140	6.8	2	4	2		2	1	2	4	2		2	1
High	P49321	Nuclear autoantigenic sperm protein OS=Homo sapiens OX=9606 GN=NASP PE=1 SV=2	29	7	7	85.2	9	788	4.3	1		2	4	4	3	1		2	4	4	3
High	P15311	Ezrin OS=Homo sapiens OX=9606 GN=EZR PE=1 SV=4	29	9	5	69.4	15	586	6.27	2	3	7	2	2	2	2	3	6	2	2	2
High	O43670	BUB3-interacting and GLEBS motif-containing protein ZNF207 OS=Homo sapiens OX=9606 GN=ZNF207 PE=1 SV=1	29	3	3	50.7	9	478	9.1	1	2	2	4	4	3	1	2	2	2	2	2
High	Q27J81	Inverted formin-2 OS=Homo sapiens OX=9606 GN=INF2 PE=1 SV=2	29	12	12	135.5	15	1249	5.38	4	5	2	1	2	2	4	5	2	1	2	2
High	O43633	Charged multivesicular body protein 2a OS=Homo sapiens OX=9606 GN=CHMP2A PE=1 SV=1	29	6	6	25.1	25	222	5.97	3	3	4	1	2	1	3	3	4	1	2	1
High	Q15637	Splicing factor 1 OS=Homo sapiens OX=9606 GN=SF1 PE=1 SV=4	29	6	6	68.3	13	639	8.98	3	3	4	2	3		3	3	4	1	2
High	Q9BQL6	Fermitin family homolog 1 OS=Homo sapiens OX=9606 GN=FERMT1 PE=1 SV=1	29	11	11	77.4	19	677	6.28	7	9	8				7	9	8
High	Q8TE67	Epidermal growth factor receptor kinase substrate 8-like protein 3 OS=Homo sapiens OX=9606 GN=EPS8L3 PE=1 SV=2	29	10	10	66.8	24	593	7.99	1	2	4	1	2	1	1	2	3	1	2	1
High	Q6IBS0	Twinfilin-2 OS=Homo sapiens OX=9606 GN=TWF2 PE=1 SV=2	29	7	6	39.5	22	349	6.84	3	3	2	2	3	2	3	3	2	2	2	2
High	O96019	Actin-like protein 6A OS=Homo sapiens OX=9606 GN=ACTL6A PE=1 SV=1	29	7	7	47.4	20	429	5.6	2		3	3	3	2	2		3	3	3	2
High	Q9HD45	Transmembrane 9 superfamily member 3 OS=Homo sapiens OX=9606 GN=TM9SF3 PE=1 SV=2	29	9	9	67.8	16	589	7.21	6	4	4		1		6	4	4		1
High	Q93084	Sarcoplasmic/endoplasmic reticulum calcium ATPase 3 OS=Homo sapiens OX=9606 GN=ATP2A3 PE=1 SV=3	29	6	1	109.2	7	999	5.52	3	3	4	2	3	2	3	3	3	2	3	2
High	Q9UL46	Proteasome activator complex subunit 2 OS=Homo sapiens OX=9606 GN=PSME2 PE=1 SV=4	29	5	5	27.4	23	239	5.73	2	3	1	3	4	4	2	3	1	3	4	4
High	O43809	Cleavage and polyadenylation specificity factor subunit 5 OS=Homo sapiens OX=9606 GN=NUDT21 PE=1 SV=1	29	6	6	26.2	27	227	8.82	2	2	3	2	4	2	2	2	3	2	3	2
High	Q6P1X6	UPF0598 protein C8orf82 OS=Homo sapiens OX=9606 GN=C8orf82 PE=1 SV=2	29	5	5	23.9	31	216	9.14	4	5	3	1	1		4	3	3	1	1
High	Q9NP79	Vacuolar protein sorting-associated protein VTA1 homolog OS=Homo sapiens OX=9606 GN=VTA1 PE=1 SV=1	29	8	8	33.9	30	307	6.29	4	4	3		2		4	4	2		2
High	P34896	Serine hydroxymethyltransferase, cytosolic OS=Homo sapiens OX=9606 GN=SHMT1 PE=1 SV=1	29	9	8	53	22	483	7.71	4	2	4	2	2	2	3	2	3	2	2	2
High	P07203	Glutathione peroxidase 1 OS=Homo sapiens OX=9606 GN=GPX1 PE=1 SV=4	29	6	6	22.1	36	203	6.55	3	4	4	2	4	1	3	4	4	2	4	1
High	Q15208	Serine/threonine-protein kinase 38 OS=Homo sapiens OX=9606 GN=STK38 PE=1 SV=1	29	9	7	54.2	23	465	7.15	2	4	5	2	2	2	2	4	4	2	2	2
High	Q13627	Dual specificity tyrosine-phosphorylation-regulated kinase 1A OS=Homo sapiens OX=9606 GN=DYRK1A PE=1 SV=2	29	11	11	85.5	17	763	8.75		1		2	3	3		1		2	3	3
High	P30837	Aldehyde dehydrogenase X, mitochondrial OS=Homo sapiens OX=9606 GN=ALDH1B1 PE=1 SV=4	29	4	2	57.2	9	517	6.99	7	5	4	2	1	2	3	3	3	2	1	2
High	P51116	Fragile X mental retardation syndrome-related protein 2 OS=Homo sapiens OX=9606 GN=FXR2 PE=1 SV=2	29	6	3	74.2	11	673	6.23	3	4	2	3	3	3	3	4	2	3	3	3
High	Q9UBS4	DnaJ homolog subfamily B member 11 OS=Homo sapiens OX=9606 GN=DNAJB11 PE=1 SV=1	28	4	4	40.5	19	358	6.18	3	5	5		1		3	3	3		1
High	P29373	Cellular retinoic acid-binding protein 2 OS=Homo sapiens OX=9606 GN=CRABP2 PE=1 SV=2	28	5	5	15.7	36	138	5.4	4	3	3	3	2	3	4	3	3	3	2	3
High	O15427	Monocarboxylate transporter 4 OS=Homo sapiens OX=9606 GN=SLC16A3 PE=1 SV=1	28	6	6	49.4	12	465	7.96	6	6	6	1	2		6	6	6	1	2
High	P62318	Small nuclear ribonucleoprotein Sm D3 OS=Homo sapiens OX=9606 GN=SNRPD3 PE=1 SV=1	28	3	3	13.9	32	126	10.32	4	2	3	3	3	2	3	2	3	2	2	2
High	P07948	Tyrosine-protein kinase Lyn OS=Homo sapiens OX=9606 GN=LYN PE=1 SV=3	28	6	3	58.5	10	512	7.11	3	4	3	3	2	1	3	3	2	2	1	1
High	P62847	40S ribosomal protein S24 OS=Homo sapiens OX=9606 GN=RPS24 PE=1 SV=1	28	4	4	15.4	35	133	10.78	3	2	2	2	3	1	3	2	2	2	2	1
High	P51608	Methyl-CpG-binding protein 2 OS=Homo sapiens OX=9606 GN=MECP2 PE=1 SV=1	28	9	9	52.4	25	486	9.95	8	6	8	1	2	1	7	5	6	1	2	1
High	O95573	Fatty acid CoA ligase Acsl3 OS=Homo sapiens OX=9606 GN=ACSL3 PE=1 SV=3	28	10	9	80.4	19	720	8.38	3	3	5				3	3	4
High	P20073	Annexin A7 OS=Homo sapiens OX=9606 GN=ANXA7 PE=1 SV=3	28	6	6	52.7	15	488	5.68	4	2	3	3	3	4	4	2	3	3	3	4
High	P53999	Activated RNA polymerase II transcriptional coactivator p15 OS=Homo sapiens OX=9606 GN=SUB1 PE=1 SV=3	28	4	4	14.4	37	127	9.6	2	2	3	2	4	3	2	2	3	2	4	3
High	Q8IWV7	E3 ubiquitin-protein ligase UBR1 OS=Homo sapiens OX=9606 GN=UBR1 PE=1 SV=1	28	13	13	200.1	10	1749	6.01	8	8	8				8	8	8
High	Q6UB35	Monofunctional C1-tetrahydrofolate synthase, mitochondrial OS=Homo sapiens OX=9606 GN=MTHFD1L PE=1 SV=1	28	10	9	105.7	11	978	8.06			1	5	5	2			1	5	5	2
High	Q9UHD1	Cysteine and histidine-rich domain-containing protein 1 OS=Homo sapiens OX=9606 GN=CHORDC1 PE=1 SV=2	28	9	9	37.5	33	332	7.87	2	3	3	3	3	1	2	3	3	3	3	1
High	Q9C005	Protein dpy-30 homolog OS=Homo sapiens OX=9606 GN=DPY30 PE=1 SV=1	28	2	2	11.2	38	99	4.88			1	1	3	2			1	1	2	1
High	Q92747	Actin-related protein 2/3 complex subunit 1A OS=Homo sapiens OX=9606 GN=ARPC1A PE=1 SV=2	28	8	8	41.5	24	370	8.18	2	4	3	1	3	2	2	4	3	1	3	2
High	O60341	Lysine-specific histone demethylase 1A OS=Homo sapiens OX=9606 GN=KDM1A PE=1 SV=2	28	15	15	92.8	21	852	6.52	1	1	1	1	1		1	1	1	1	1
High	O75367	Core histone macro-H2A.1 OS=Homo sapiens OX=9606 GN=MACROH2A1 PE=1 SV=4	28	8	8	39.6	26	372	9.79	4	3	3	5	3	5	4	3	3	5	3	5
High	P31689	DnaJ homolog subfamily A member 1 OS=Homo sapiens OX=9606 GN=DNAJA1 PE=1 SV=2	28	9	9	44.8	34	397	7.08	6	5	3	1	2	2	5	5	3	1	2	2
High	P48729	Casein kinase I isoform alpha OS=Homo sapiens OX=9606 GN=CSNK1A1 PE=1 SV=2	28	8	8	38.9	25	337	9.57	3	4	6	1	2	1	3	4	6	1	2	1
High	Q9BW04	Specifically androgen-regulated gene protein OS=Homo sapiens OX=9606 GN=SARG PE=1 SV=2	28	7	7	63.9	17	601	8.62	2	2	2	3	4	3	2	2	2	3	4	3
High	P84022	Mothers against decapentaplegic homolog 3 OS=Homo sapiens OX=9606 GN=SMAD3 PE=1 SV=1	28	5	4	48.1	16	425	7.15	2	2	2	4	3	3	2	2	2	4	3	3
High	Q9UBM7	7-dehydrocholesterol reductase OS=Homo sapiens OX=9606 GN=DHCR7 PE=1 SV=1	28	6	6	54.5	15	475	8.7	5	2	4	3	1	1	5	2	4	3	1	1
High	Q52LJ0	Protein FAM98B OS=Homo sapiens OX=9606 GN=FAM98B PE=1 SV=2	28	6	6	45.5	21	433	8.69			1	3	3	3			1	3	3	2
High	Q06323	Proteasome activator complex subunit 1 OS=Homo sapiens OX=9606 GN=PSME1 PE=1 SV=1	28	8	8	28.7	37	249	6.02	2	3	1	3	6	2	2	3	1	3	4	2
High	Q9Y285	Phenylalanine--tRNA ligase alpha subunit OS=Homo sapiens OX=9606 GN=FARSA PE=1 SV=3	28	11	11	57.5	29	508	7.8	2	4	4	2	1	2	2	4	4	2	1	2
High	Q13283	Ras GTPase-activating protein-binding protein 1 OS=Homo sapiens OX=9606 GN=G3BP1 PE=1 SV=1	27	7	7	52.1	23	466	5.52	3	3	5	1	4	1	3	3	5	1	2	1
High	Q9C0A6	Histone-lysine N-methyltransferase SETD5 OS=Homo sapiens OX=9606 GN=SETD5 PE=1 SV=2	27	6	5	157.4	6	1442	8.46				4	4	4				4	4	4
High	Q9UNF1	Melanoma-associated antigen D2 OS=Homo sapiens OX=9606 GN=MAGED2 PE=1 SV=2	27	8	7	64.9	20	606	9.32	3	3	3	1			3	3	3	1
High	Q9GZR7	ATP-dependent RNA helicase DDX24 OS=Homo sapiens OX=9606 GN=DDX24 PE=1 SV=1	27	9	9	96.3	17	859	9.06	1	1	1	2	2	2	1	1	1	2	2	2
High	P21291	Cysteine and glycine-rich protein 1 OS=Homo sapiens OX=9606 GN=CSRP1 PE=1 SV=3	27	5	5	20.6	38	193	8.57	3	3	2	3	2	3	3	3	2	3	2	3
High	P57764	Gasdermin-D OS=Homo sapiens OX=9606 GN=GSDMD PE=1 SV=1	27	7	7	52.8	20	484	5.08	3	3	6	2	4	1	2	3	6	2	4	1
High	Q5VZK9	F-actin-uncapping protein LRRC16A OS=Homo sapiens OX=9606 GN=CARMIL1 PE=1 SV=1	27	13	13	151.5	11	1371	7.85	6	7	6			1	6	7	6			1
High	Q9Y6W5	Wiskott-Aldrich syndrome protein family member 2 OS=Homo sapiens OX=9606 GN=WASF2 PE=1 SV=3	27	6	6	54.3	14	498	5.53	3	3	3	1	4	2	3	3	3	1	3	2
High	P51812	Ribosomal protein S6 kinase alpha-3 OS=Homo sapiens OX=9606 GN=RPS6KA3 PE=1 SV=1	27	8	4	83.7	13	740	6.89	1	2	1	3	4	1	1	2	1	2	3	1
High	P30044	Peroxiredoxin-5, mitochondrial OS=Homo sapiens OX=9606 GN=PRDX5 PE=1 SV=4	27	6	6	22.1	39	214	8.7	4	1	4	1	1	3	4	1	4	1	1	3
High	Q9NSY1	BMP-2-inducible protein kinase OS=Homo sapiens OX=9606 GN=BMP2K PE=1 SV=2	27	9	9	129.1	12	1161	6.51	4	3	4				4	3	4
High	P21796	Voltage-dependent anion-selective channel protein 1 OS=Homo sapiens OX=9606 GN=VDAC1 PE=1 SV=2	27	6	5	30.8	26	283	8.54	2	2	3		2	1	2	2	3		2	1
High	P51149	Ras-related protein Rab-7a OS=Homo sapiens OX=9606 GN=RAB7A PE=1 SV=1	27	6	6	23.5	33	207	6.7	5	4	4		2		5	4	4		2
High	O94906	Pre-mRNA-processing factor 6 OS=Homo sapiens OX=9606 GN=PRPF6 PE=1 SV=1	27	11	11	106.9	14	941	8.25	1	2	1		2	1	1	2	1		2	1
High	P57735	Ras-related protein Rab-25 OS=Homo sapiens OX=9606 GN=RAB25 PE=1 SV=2	27	4	3	23.5	19	213	5.96	2	3	4	2	3	3	2	3	3	2	3	3
High	Q9H074	Polyadenylate-binding protein-interacting protein 1 OS=Homo sapiens OX=9606 GN=PAIP1 PE=1 SV=1	27	6	6	53.5	14	479	4.81	2	2	3	2	2	3	2	2	3	2	2	2
High	Q3YEC7	Rab-like protein 6 OS=Homo sapiens OX=9606 GN=RABL6 PE=1 SV=2	27	7	7	79.5	13	729	5.22	4	2	3	2	2	1	4	2	3	2	2	1
High	Q2TB90	Hexokinase HKDC1 OS=Homo sapiens OX=9606 GN=HKDC1 PE=1 SV=3	27	11	8	102.5	11	917	7.12	3	3	3	1	1		3	3	3	1	1
High	Q15645	Pachytene checkpoint protein 2 homolog OS=Homo sapiens OX=9606 GN=TRIP13 PE=1 SV=2	27	11	11	48.5	26	432	6.09	4	5	7		1		4	5	7		1
High	Q15008	26S proteasome non-ATPase regulatory subunit 6 OS=Homo sapiens OX=9606 GN=PSMD6 PE=1 SV=1	27	8	8	45.5	21	389	5.62	1	2	1	3	4	4	1	2	1	3	4	4
High	Q14126	Desmoglein-2 OS=Homo sapiens OX=9606 GN=DSG2 PE=1 SV=2	27	7	7	122.2	11	1118	5.24	4	5	3	2	1	1	4	5	3	2	1	1
High	P50416	Carnitine O-palmitoyltransferase 1, liver isoform OS=Homo sapiens OX=9606 GN=CPT1A PE=1 SV=2	27	10	10	88.3	14	773	8.65	7	4	5				7	4	5
High	Q96I25	Splicing factor 45 OS=Homo sapiens OX=9606 GN=RBM17 PE=1 SV=1	27	6	6	44.9	16	401	5.97	2	1		3	3	3	2	1		3	3	3
High	P27797	Calreticulin OS=Homo sapiens OX=9606 GN=CALR PE=1 SV=1	27	7	7	48.1	23	417	4.44	7	5	5	1	1	1	6	5	5	1	1	1
High	Q9BQ67	Glutamate-rich WD repeat-containing protein 1 OS=Homo sapiens OX=9606 GN=GRWD1 PE=1 SV=1	26	5	5	49.4	17	446	4.92	2	2	1	3	3	3	2	2	1	3	3	3
High	P61758	Prefoldin subunit 3 OS=Homo sapiens OX=9606 GN=VBP1 PE=1 SV=4	26	6	6	22.6	26	197	7.11	1		2	4	5	5	1		2	4	5	5
High	Q6PGP7	Tetratricopeptide repeat protein 37 OS=Homo sapiens OX=9606 GN=TTC37 PE=1 SV=1	26	12	12	175.4	11	1564	7.53	9	6	7				9	6	7
High	P21912	Succinate dehydrogenase [ubiquinone] iron-sulfur subunit, mitochondrial OS=Homo sapiens OX=9606 GN=SDHB PE=1 SV=3	26	6	6	31.6	22	280	8.76	3	3	1	1	5	3	3	3	1	1	4	3
High	Q5T440	Putative transferase CAF17, mitochondrial OS=Homo sapiens OX=9606 GN=IBA57 PE=1 SV=1	26	4	4	38.1	11	356	9.83		1	3	3	3	4		1	3	3	3	4
High	P02768-1	SWISS-PROT:P02768-1 Tax_Id=9606 Gene_Symbol=ALB Isoform 1 of Serum albumin precursor	26	7	3	69.3	10	609	6.28	2	3	1	3	6	2	2	3	1	3	6	2
High	Q8N4T8	3-oxoacyl-[acyl-carrier-protein] reductase OS=Homo sapiens OX=9606 GN=CBR4 PE=1 SV=3	26	6	6	25.3	35	237	9.33	4	2	2	2	3	2	4	2	2	2	3	2
High	P61619	Protein transport protein Sec61 subunit alpha isoform 1 OS=Homo sapiens OX=9606 GN=SEC61A1 PE=1 SV=2	26	5	5	52.2	11	476	8.06	2	2	2	3	2	3	2	2	2	3	2	3
High	Q12800	Alpha-globin transcription factor CP2 OS=Homo sapiens OX=9606 GN=TFCP2 PE=1 SV=2	26	7	6	57.2	21	502	5.8	6	7	5		1		6	7	5		1
High	Q9Y6E2	eIF5-mimic protein 1 OS=Homo sapiens OX=9606 GN=BZW2 PE=1 SV=1	26	10	9	48.1	24	419	6.68	2	1	3	2	4	2	2	1	3	2	4	2
High	Q8N684	Cleavage and polyadenylation specificity factor subunit 7 OS=Homo sapiens OX=9606 GN=CPSF7 PE=1 SV=1	26	7	7	52	16	471	8				3	6	4				3	6	4
High	P13796	Plastin-2 OS=Homo sapiens OX=9606 GN=LCP1 PE=1 SV=6	26	7	1	70.2	11	627	5.43	1	2	2	3	5	5	1	2	2	3	5	5
High	O14618	Copper chaperone for superoxide dismutase OS=Homo sapiens OX=9606 GN=CCS PE=1 SV=1	26	5	5	29	16	274	5.58	1	1		2	5	3	1	1		2	5	3
High	P52292	Importin subunit alpha-1 OS=Homo sapiens OX=9606 GN=KPNA2 PE=1 SV=1	26	7	7	57.8	16	529	5.4	1		3	3	4	4	1		3	3	4	4
High	Q13765	Nascent polypeptide-associated complex subunit alpha OS=Homo sapiens OX=9606 GN=NACA PE=1 SV=1	26	3	3	23.4	20	215	4.56	3	2	3	3	2	2	2	1	2	2	1	1
High	O94903	Pyridoxal phosphate homeostasis protein OS=Homo sapiens OX=9606 GN=PLPBP PE=1 SV=1	26	7	7	30.3	29	275	7.5	1	3	3	4		4	1	3	2	4		4
High	O00505	Importin subunit alpha-4 OS=Homo sapiens OX=9606 GN=KPNA3 PE=1 SV=2	26	6	3	57.8	13	521	4.94		1	2	2	3	2		1	2	2	3	2
High	Q9NQ88	Fructose-2,6-bisphosphatase TIGAR OS=Homo sapiens OX=9606 GN=TIGAR PE=1 SV=1	26	5	5	30	26	270	7.69	1	2	2	2	3	2	1	2	2	2	3	2
High	Q8NAP3	Zinc finger and BTB domain-containing protein 38 OS=Homo sapiens OX=9606 GN=ZBTB38 PE=1 SV=2	26	8	8	134.2	7	1195	8.03				3	4	3				3	4	3
High	O15305	Phosphomannomutase 2 OS=Homo sapiens OX=9606 GN=PMM2 PE=1 SV=1	26	6	6	28.1	23	246	6.77	1	1	2	3	3	2	1	1	2	3	3	2
High	Q12849	G-rich sequence factor 1 OS=Homo sapiens OX=9606 GN=GRSF1 PE=1 SV=3	26	7	7	53.1	19	480	6.19		2	1	3	3	3		2	1	3	3	3
High	Q02750	Dual specificity mitogen-activated protein kinase kinase 1 OS=Homo sapiens OX=9606 GN=MAP2K1 PE=1 SV=2	26	7	5	43.4	25	393	6.62	4	4	4	1	2	1	4	4	3	1	2	1
High	P40926	Malate dehydrogenase, mitochondrial OS=Homo sapiens OX=9606 GN=MDH2 PE=1 SV=3	26	8	8	35.5	29	338	8.68	3	1	6	5	3	5	3	1	6	5	2	5
High	Q8N2K0	Lysophosphatidylserine lipase ABHD12 OS=Homo sapiens OX=9606 GN=ABHD12 PE=1 SV=2	26	7	7	45.1	21	398	8.65	4	4	4	1	2	1	4	4	2	1	2	1
High	P62899	60S ribosomal protein L31 OS=Homo sapiens OX=9606 GN=RPL31 PE=1 SV=1	26	3	3	14.5	25	125	10.54	3	3	3	2	2	2	3	3	2	2	2	2
High	P53007	Tricarboxylate transport protein, mitochondrial OS=Homo sapiens OX=9606 GN=SLC25A1 PE=1 SV=2	26	5	5	34	17	311	9.89	3	4	2	2	1	1	3	3	1	2	1	1
High	Q13573	SNW domain-containing protein 1 OS=Homo sapiens OX=9606 GN=SNW1 PE=1 SV=1	26	7	7	61.5	15	536	9.52	3	3	2	1	2	3	3	3	2	1	2	3
High	O43823	A-kinase anchor protein 8 OS=Homo sapiens OX=9606 GN=AKAP8 PE=1 SV=1	26	10	10	76.1	22	692	5.15	1	3	3		1		1	3	3		1
High	Q12789	General transcription factor 3C polypeptide 1 OS=Homo sapiens OX=9606 GN=GTF3C1 PE=1 SV=4	26	13	13	238.7	8	2109	7.3	1		2		5	2	1		2		5	2
High	O60381	HMG box-containing protein 1 OS=Homo sapiens OX=9606 GN=HBP1 PE=1 SV=2	26	9	9	57.6	25	514	6.19				2	4	2				2	4	2
High	Q9NX24	H/ACA ribonucleoprotein complex subunit 2 OS=Homo sapiens OX=9606 GN=NHP2 PE=1 SV=1	26	3	3	17.2	30	153	8.22	2	2	3	1	2	1	2	2	3	1	2	1
High	Q9P287	BRCA2 and CDKN1A-interacting protein OS=Homo sapiens OX=9606 GN=BCCIP PE=1 SV=1	26	6	6	36	25	314	4.61	4	4	4	2	1	1	4	4	4	2	1	1
High	Q96IU4	Protein ABHD14B OS=Homo sapiens OX=9606 GN=ABHD14B PE=1 SV=1	26	8	8	22.3	48	210	6.4	5	5	5	1	1		5	5	5	1	1
High	P50851	Lipopolysaccharide-responsive and beige-like anchor protein OS=Homo sapiens OX=9606 GN=LRBA PE=1 SV=4	26	12	12	318.9	5	2863	5.6	2	2	7	1		1	2	2	7	1		1
High	P16455	Methylated-DNA--protein-cysteine methyltransferase OS=Homo sapiens OX=9606 GN=MGMT PE=1 SV=1	26	6	6	21.6	33	207	8.1	3	3	2	2	3	2	3	3	2	2	3	2
High	Q92552	28S ribosomal protein S27, mitochondrial OS=Homo sapiens OX=9606 GN=MRPS27 PE=1 SV=3	26	9	9	47.6	25	414	6.18	2	3	1	2	2	3	2	3	1	2	2	3
High	Q9BRK5	45 kDa calcium-binding protein OS=Homo sapiens OX=9606 GN=SDF4 PE=1 SV=1	26	6	6	41.8	20	362	4.86	5	5	6	2	1	2	4	4	6	2	1	2
High	Q96SB4	SRSF protein kinase 1 OS=Homo sapiens OX=9606 GN=SRPK1 PE=1 SV=2	26	9	7	74.3	17	655	6.16			2	2	4	3			2	2	4	3
High	P62857	40S ribosomal protein S28 OS=Homo sapiens OX=9606 GN=RPS28 PE=1 SV=1	26	2	2	7.8	30	69	10.7	3	2	3	2	3	3	2	2	2	1	2	2
High	O00410	Importin-5 OS=Homo sapiens OX=9606 GN=IPO5 PE=1 SV=4	26	7	7	123.6	9	1097	4.94	3	2		1		2	3	2		1		2
High	Q9NY12	H/ACA ribonucleoprotein complex subunit 1 OS=Homo sapiens OX=9606 GN=GAR1 PE=1 SV=1	25	4	4	22.3	25	217	10.92	3	3	4	2	1	1	3	3	4	2	1	1
High	P43304	Glycerol-3-phosphate dehydrogenase, mitochondrial OS=Homo sapiens OX=9606 GN=GPD2 PE=1 SV=3	25	10	10	80.8	15	727	7.69				2	2	4				2	2	4
High	Q9UKV3	Apoptotic chromatin condensation inducer in the nucleus OS=Homo sapiens OX=9606 GN=ACIN1 PE=1 SV=2	25	8	8	151.8	8	1341	6.43	2	1	2	4	5	2	2	1	2	4	4	2
High	P63165	Small ubiquitin-related modifier 1 OS=Homo sapiens OX=9606 GN=SUMO1 PE=1 SV=1	25	3	3	11.6	28	101	5.52				1	2	1				1	2	1
High	O60784	Target of Myb protein 1 OS=Homo sapiens OX=9606 GN=TOM1 PE=1 SV=2	25	7	7	53.8	25	492	4.7	3	3	3				3	3	3
High	Q14244	Ensconsin OS=Homo sapiens OX=9606 GN=MAP7 PE=1 SV=1	25	5	5	84	7	749	9.61	2	3	3	2	3	2	2	3	3	2	3	2
High	O15145	Actin-related protein 2/3 complex subunit 3 OS=Homo sapiens OX=9606 GN=ARPC3 PE=1 SV=3	25	4	4	20.5	21	178	8.59	4	3	3	1	2	1	4	3	3	1	2	1
High	Q9Y5M8	Signal recognition particle receptor subunit beta OS=Homo sapiens OX=9606 GN=SRPRB PE=1 SV=3	25	6	6	29.7	27	271	9.04	3	2	4	2	2	2	3	2	4	2	2	2
High	P62070	Ras-related protein R-Ras2 OS=Homo sapiens OX=9606 GN=RRAS2 PE=1 SV=1	25	5	3	23.4	31	204	6.01	3	4	3	1	1	1	3	4	2	1	1	1
High	P08559	Pyruvate dehydrogenase E1 component subunit alpha, somatic form, mitochondrial OS=Homo sapiens OX=9606 GN=PDHA1 PE=1 SV=3	25	9	9	43.3	22	390	8.06	1			2	3	1	1			2	3	1
High	Q9NR19	Acetyl-coenzyme A synthetase, cytoplasmic OS=Homo sapiens OX=9606 GN=ACSS2 PE=1 SV=1	25	5	5	78.5	6	701	6.46	3	3	4	2	2	1	3	3	4	2	2	1
High	Q99471	Prefoldin subunit 5 OS=Homo sapiens OX=9606 GN=PFDN5 PE=1 SV=2	25	5	5	17.3	38	154	6.33	2	2	2	2	2	2	2	2	2	2	2	2
High	Q92925	SWI/SNF-related matrix-associated actin-dependent regulator of chromatin subfamily D member 2 OS=Homo sapiens OX=9606 GN=SMARCD2 PE=1 SV=3	25	8	7	58.9	19	531	9.64	1	1	1	2	2	1	1	1	1	2	2	1
High	O95299	NADH dehydrogenase [ubiquinone] 1 alpha subcomplex subunit 10, mitochondrial OS=Homo sapiens OX=9606 GN=NDUFA10 PE=1 SV=1	25	4	4	40.7	11	355	8.48	2	3	3	2	2	3	2	3	3	2	2	3
High	O75663	TIP41-like protein OS=Homo sapiens OX=9606 GN=TIPRL PE=1 SV=2	25	7	7	31.4	38	272	5.91	4	3	3	1	2		4	3	3	1	2
High	Q05193	Dynamin-1 OS=Homo sapiens OX=9606 GN=DNM1 PE=1 SV=2	25	6	1	97.3	7	864	7.17	4	3	5			2	4	3	5			2
High	P60953	Cell division control protein 42 homolog OS=Homo sapiens OX=9606 GN=CDC42 PE=1 SV=2	25	4	3	21.2	26	191	6.55	3	5	2	2	2	2	3	4	2	2	2	2
High	O00193	Small acidic protein OS=Homo sapiens OX=9606 GN=SMAP PE=1 SV=1	25	4	4	20.3	22	183	4.72	1	1	3	2	4	3	1	1	3	2	4	2
High	O94776	Metastasis-associated protein MTA2 OS=Homo sapiens OX=9606 GN=MTA2 PE=1 SV=1	25	8	7	75	14	668	9.66	1	2	4	2	3	1	1	2	3	2	3	1
High	Q8TD30	Alanine aminotransferase 2 OS=Homo sapiens OX=9606 GN=GPT2 PE=1 SV=1	25	8	8	57.9	25	523	7.71	1	4	4		2		1	4	4		2
High	Q93052	Lipoma-preferred partner OS=Homo sapiens OX=9606 GN=LPP PE=1 SV=1	25	6	6	65.7	17	612	7.37	2	2	2	3	3	2	2	2	2	3	3	2
High	Q96FJ0	AMSH-like protease OS=Homo sapiens OX=9606 GN=STAMBPL1 PE=1 SV=2	25	6	6	49.8	20	436	7.23	3	3	4	1		1	3	3	4	1		1
High	P98082	Disabled homolog 2 OS=Homo sapiens OX=9606 GN=DAB2 PE=1 SV=3	25	7	7	82.4	17	770	5.53	2	2	4				2	2	4
High	O00469	Procollagen-lysine,2-oxoglutarate 5-dioxygenase 2 OS=Homo sapiens OX=9606 GN=PLOD2 PE=1 SV=2	25	10	10	84.6	16	737	6.71	2		3		2		2		3		2
High	Q14498	RNA-binding protein 39 OS=Homo sapiens OX=9606 GN=RBM39 PE=1 SV=2	25	5	5	59.3	12	530	10.1	2	2	2	2	2	2	2	2	2	2	2	2
High	P31948	Stress-induced-phosphoprotein 1 OS=Homo sapiens OX=9606 GN=STIP1 PE=1 SV=1	25	7	7	62.6	16	543	6.8	4	3	5	1	2	1	4	3	5	1	2	1
High	Q92506	(3R)-3-hydroxyacyl-CoA dehydrogenase OS=Homo sapiens OX=9606 GN=HSD17B8 PE=1 SV=2	25	5	5	27	25	261	6.54	1	1	1	3	3	3	1	1	1	3	3	3
High	P09211	Glutathione S-transferase P OS=Homo sapiens OX=9606 GN=GSTP1 PE=1 SV=2	25	5	5	23.3	36	210	5.64	3	3	3	1	2	1	3	3	3	1	2	1
High	O75436	Vacuolar protein sorting-associated protein 26A OS=Homo sapiens OX=9606 GN=VPS26A PE=1 SV=2	25	5	4	38.1	22	327	6.57	2	3	3	3	4	2	2	3	3	3	4	2
High	Q9NQT8	Kinesin-like protein KIF13B OS=Homo sapiens OX=9606 GN=KIF13B PE=1 SV=2	25	7	6	202.7	5	1826	5.88	4	4	2		2		4	4	2		2
High	Q16543	Hsp90 co-chaperone Cdc37 OS=Homo sapiens OX=9606 GN=CDC37 PE=1 SV=1	25	7	7	44.4	21	378	5.25	2	2	5	4	2	2	2	2	5	4	2	2
High	Q9Y6R7	IgGFc-binding protein OS=Homo sapiens OX=9606 GN=FCGBP PE=1 SV=3	25	11	11	571.6	6	5405	5.34
High	Q9Y5A9	YTH domain-containing family protein 2 OS=Homo sapiens OX=9606 GN=YTHDF2 PE=1 SV=2	25	4	3	62.3	7	579	8.79	3	3	3	3	3	2	3	3	3	3	3	2
High	Q9UHD2	Serine/threonine-protein kinase TBK1 OS=Homo sapiens OX=9606 GN=TBK1 PE=1 SV=1	25	9	9	83.6	14	729	6.79	2	1	2	1	2		2	1	2	1	2
High	Q8TCT9	Minor histocompatibility antigen H13 OS=Homo sapiens OX=9606 GN=HM13 PE=1 SV=1	25	5	5	41.5	16	377	6.43	2	3	3		3	1	2	3	3		3	1
High	O75643	U5 small nuclear ribonucleoprotein 200 kDa helicase OS=Homo sapiens OX=9606 GN=SNRNP200 PE=1 SV=2	25	15	15	244.4	10	2136	6.06	3		2	1	3		3		2	1	3
High	Q92905	COP9 signalosome complex subunit 5 OS=Homo sapiens OX=9606 GN=COPS5 PE=1 SV=4	25	6	6	37.6	23	334	6.54	2	2	4		3		2	2	4		3
High	P08758	Annexin A5 OS=Homo sapiens OX=9606 GN=ANXA5 PE=1 SV=2	25	8	8	35.9	26	320	5.05	3	2	3	4	5	4	3	2	3	2	5	3
High	Q9NZ01	Very-long-chain enoyl-CoA reductase OS=Homo sapiens OX=9606 GN=TECR PE=1 SV=1	25	8	8	36	25	308	9.45	5	6	3			1	5	5	3			1
High	Q9H7C9	Mth938 domain-containing protein OS=Homo sapiens OX=9606 GN=AAMDC PE=1 SV=1	25	5	5	13.3	43	122	8.46	2		3	3		4	2		3	3		3
High	Q9P035	Very-long-chain (3R)-3-hydroxyacyl-CoA dehydratase 3 OS=Homo sapiens OX=9606 GN=HACD3 PE=1 SV=2	24	5	5	43.1	14	362	8.94	5	4	2	1	2		5	4	2	1	2
High	P28331	NADH-ubiquinone oxidoreductase 75 kDa subunit, mitochondrial OS=Homo sapiens OX=9606 GN=NDUFS1 PE=1 SV=3	24	11	11	79.4	19	727	6.23	1	2	3	1	2		1	2	3	1	2
High	A3KMH1	von Willebrand factor A domain-containing protein 8 OS=Homo sapiens OX=9606 GN=VWA8 PE=1 SV=2	24	7	7	214.7	4	1905	7.4	7	6	3		1		7	6	3		1
High	P11908	Ribose-phosphate pyrophosphokinase 2 OS=Homo sapiens OX=9606 GN=PRPS2 PE=1 SV=2	24	5	1	34.7	20	318	6.61	3	3	3	3	1	3	3	3	3	3	1	3
High	Q9UBV8	Peflin OS=Homo sapiens OX=9606 GN=PEF1 PE=1 SV=1	24	4	4	30.4	13	284	6.54	3	3	3	3	2	1	3	3	3	3	2	1
High	Q9H2P0	Activity-dependent neuroprotector homeobox protein OS=Homo sapiens OX=9606 GN=ADNP PE=1 SV=1	24	7	7	123.5	8	1102	7.34	3	2	3	2	2	3	3	2	3	2	2	3
High	Q8IYS1	Xaa-Arg dipeptidase OS=Homo sapiens OX=9606 GN=PM20D2 PE=1 SV=2	24	3	3	47.7	11	436	5.85	2	3	2	2	2	2	2	3	2	2	2	2
High	P62837	Ubiquitin-conjugating enzyme E2 D2 OS=Homo sapiens OX=9606 GN=UBE2D2 PE=1 SV=1	24	4	3	16.7	41	147	7.83	2	4	4	1	3	2	2	4	3	1	2	2
High	P40429	60S ribosomal protein L13a OS=Homo sapiens OX=9606 GN=RPL13A PE=1 SV=2	24	4	4	23.6	21	203	10.93	2	1	2	2	2	2	2	1	1	2	2	2
High	O14980	Exportin-1 OS=Homo sapiens OX=9606 GN=XPO1 PE=1 SV=1	24	9	9	123.3	9	1071	6.06	3	4	2		2		2	4	2		2
High	P12882	Myosin-1 OS=Homo sapiens OX=9606 GN=MYH1 PE=1 SV=3	24	9	4	223	6	1939	5.74	2	2	4	3	6	3	2	1	2	3	6	3
High	P62266	40S ribosomal protein S23 OS=Homo sapiens OX=9606 GN=RPS23 PE=1 SV=3	24	3	3	15.8	21	143	10.49	2	2	3	2	2	3	2	2	3	2	2	2
High	P02452	Collagen alpha-1(I) chain OS=Homo sapiens OX=9606 GN=COL1A1 PE=1 SV=6	24	4	4	138.8	3	1464	5.8				5	14	5				3	4	3
High	Q7L2E3	ATP-dependent RNA helicase DHX30 OS=Homo sapiens OX=9606 GN=DHX30 PE=1 SV=1	24	8	8	133.9	9	1194	8.78	1	1	1	2	2	3	1	1	1	2	2	3
High	Q9Y3A5	Ribosome maturation protein SBDS OS=Homo sapiens OX=9606 GN=SBDS PE=1 SV=4	24	6	6	28.7	24	250	8.75	4	3	3	1	1	1	4	3	3	1	1	1
High	Q96HE7	ERO1-like protein alpha OS=Homo sapiens OX=9606 GN=ERO1A PE=1 SV=2	24	9	9	54.4	27	468	5.68	2	3	2	2	1		2	3	2	2	1
High	P02584	SWISS-PROT:P02584 (Bos taurus) Profilin-1	24	4	1	15	31	140	8.28	3	3	3	3	2	2	3	3	3	3	2	2
High	Q99700	Ataxin-2 OS=Homo sapiens OX=9606 GN=ATXN2 PE=1 SV=2	24	5	5	140.2	5	1313	9.57	1	1	1	4	2	4	1	1	1	4	2	4
High	Q02978	Mitochondrial 2-oxoglutarate/malate carrier protein OS=Homo sapiens OX=9606 GN=SLC25A11 PE=1 SV=3	24	7	7	34	23	314	9.91	5	4	7				5	4	7
High	Q15382	GTP-binding protein Rheb OS=Homo sapiens OX=9606 GN=RHEB PE=1 SV=1	24	5	5	20.5	28	184	5.92	2	3	2	1	2	1	2	3	2	1	2	1
High	Q9HC78	Zinc finger and BTB domain-containing protein 20 OS=Homo sapiens OX=9606 GN=ZBTB20 PE=1 SV=3	24	10	10	81	20	741	6.49
High	P20340	Ras-related protein Rab-6A OS=Homo sapiens OX=9606 GN=RAB6A PE=1 SV=3	24	5	4	23.6	25	208	5.54	3	2	3	2	2	1	2	1	2	2	1	1
High	Q9UEY8	Gamma-adducin OS=Homo sapiens OX=9606 GN=ADD3 PE=1 SV=1	24	9	9	79.1	16	706	6.32		1	2		4			1	2		4
High	Q9BY42	Replication termination factor 2 OS=Homo sapiens OX=9606 GN=RTF2 PE=1 SV=3	24	6	6	33.9	25	306	8.59	1	3	2	4	4	3	1	3	2	4	4	3
High	P38606	V-type proton ATPase catalytic subunit A OS=Homo sapiens OX=9606 GN=ATP6V1A PE=1 SV=2	23	8	8	68.3	16	617	5.52	4	4	2			1	4	4	2			1
High	Q9BQA1	Methylosome protein 50 OS=Homo sapiens OX=9606 GN=WDR77 PE=1 SV=1	23	6	6	36.7	25	342	5.17		1	2	4	4	2		1	2	3	3	2
High	Q9BV57	1,2-dihydroxy-3-keto-5-methylthiopentene dioxygenase OS=Homo sapiens OX=9606 GN=ADI1 PE=1 SV=1	23	4	4	21.5	24	179	5.68	1	3	2	2	2	2	1	2	2	2	2	2
High	Q8IZP0	Abl interactor 1 OS=Homo sapiens OX=9606 GN=ABI1 PE=1 SV=4	23	7	4	55	18	508	7.06	2	2		1	1	1	2	2		1	1	1
High	Q9BW27	Nuclear pore complex protein Nup85 OS=Homo sapiens OX=9606 GN=NUP85 PE=1 SV=1	23	10	10	75	21	656	5.55	1	2	2			1	1	2	2			1
High	Q8WXI9	Transcriptional repressor p66-beta OS=Homo sapiens OX=9606 GN=GATAD2B PE=1 SV=1	23	5	4	65.2	13	593	9.7		2	2	2	3	3		2	2	2	3	3
High	Q9UBE0	SUMO-activating enzyme subunit 1 OS=Homo sapiens OX=9606 GN=SAE1 PE=1 SV=1	23	8	8	38.4	30	346	5.3	3	3	6		1		3	3	6		1
High	Q9Y263	Phospholipase A-2-activating protein OS=Homo sapiens OX=9606 GN=PLAA PE=1 SV=2	23	8	8	87.1	16	795	6.37	1		3	2	2	2	1		3	2	2	2
High	Q5TC82	Roquin-1 OS=Homo sapiens OX=9606 GN=RC3H1 PE=1 SV=1	23	9	5	125.7	12	1133	7.27				5	2	4				4	2	4
High	O43615	Mitochondrial import inner membrane translocase subunit TIM44 OS=Homo sapiens OX=9606 GN=TIMM44 PE=1 SV=2	23	10	10	51.3	25	452	8.32	4	4	6		1		4	4	6		1
High	O43175	D-3-phosphoglycerate dehydrogenase OS=Homo sapiens OX=9606 GN=PHGDH PE=1 SV=4	23	10	10	56.6	21	533	6.71	1	2	1			1	1	2	1			1
High	Q14653	Interferon regulatory factor 3 OS=Homo sapiens OX=9606 GN=IRF3 PE=1 SV=1	23	6	6	47.2	20	427	5.34	3	4	6	1		1	3	3	5	1		1
High	P42566	Epidermal growth factor receptor substrate 15 OS=Homo sapiens OX=9606 GN=EPS15 PE=1 SV=2	23	7	7	98.6	8	896	4.64	2	1	1		1		2	1	1		1
High	Q9UBI6	Guanine nucleotide-binding protein G(I)/G(S)/G(O) subunit gamma-12 OS=Homo sapiens OX=9606 GN=GNG12 PE=1 SV=3	23	4	4	8	69	72	8.97	2	3	3	1	1	2	2	3	3	1	1	2
High	Q96C86	m7GpppX diphosphatase OS=Homo sapiens OX=9606 GN=DCPS PE=1 SV=2	23	6	6	38.6	21	337	6.38	1	1	1	3	5	1	1	1	1	3	5	1
High	P49006	MARCKS-related protein OS=Homo sapiens OX=9606 GN=MARCKSL1 PE=1 SV=2	23	5	5	19.5	55	195	4.67	2	2	2	1	2	1	2	2	2	1	2	1
High	Q9H6Q4	Cytosolic iron-sulfur assembly component 3 OS=Homo sapiens OX=9606 GN=CIAO3 PE=1 SV=1	23	8	8	53	26	476	7.23	2	2	3	3	1	3	2	2	3	3	1	3
High	P40121	Macrophage-capping protein OS=Homo sapiens OX=9606 GN=CAPG PE=1 SV=2	23	6	6	38.5	23	348	6.19	3	3	4	1	1	1	3	3	4	1	1	1
High	O75947	ATP synthase subunit d, mitochondrial OS=Homo sapiens OX=9606 GN=ATP5PD PE=1 SV=3	23	6	6	18.5	43	161	5.3	1	1	1	2	3	3	1	1	1	2	3	3
High	Q86V15	Zinc finger protein castor homolog 1 OS=Homo sapiens OX=9606 GN=CASZ1 PE=1 SV=4	23	12	12	189.9	10	1759	7.03	7	9	7				7	9	7
High	P28799	Progranulin OS=Homo sapiens OX=9606 GN=GRN PE=1 SV=2	23	5	5	63.5	16	593	6.83	2	2		1	2	1	2	2		1	2	1
High	Q8NI27	THO complex subunit 2 OS=Homo sapiens OX=9606 GN=THOC2 PE=1 SV=2	23	10	10	182.7	7	1593	8.44	2		1	1	3	3	2		1	1	3	3
High	Q14966	Zinc finger protein 638 OS=Homo sapiens OX=9606 GN=ZNF638 PE=1 SV=2	23	10	10	220.5	7	1978	6.38	2	3	2	2	1	2	2	3	2	2	1	2
High	Q9Y3E7	Charged multivesicular body protein 3 OS=Homo sapiens OX=9606 GN=CHMP3 PE=1 SV=3	23	6	6	25.1	34	222	5.12	2	3	2				2	3	2
High	P40938	Replication factor C subunit 3 OS=Homo sapiens OX=9606 GN=RFC3 PE=1 SV=2	23	5	5	40.5	22	356	8.34	4	4	4			1	4	4	3			1
High	Q9HB71	Calcyclin-binding protein OS=Homo sapiens OX=9606 GN=CACYBP PE=1 SV=2	23	4	4	26.2	22	228	8.25	1	1	2	3	2	3	1	1	2	3	2	3
High	P50452	Serpin B8 OS=Homo sapiens OX=9606 GN=SERPINB8 PE=1 SV=2	23	6	4	42.7	15	374	5.57	2	2	2	1	5	4	2	2	2	1	4	4
High	Q9Y2Z0	Protein SGT1 homolog OS=Homo sapiens OX=9606 GN=SUGT1 PE=1 SV=3	23	8	8	41	27	365	5.16	1		3	2	3	2	1		3	2	3	2
High	O95232	Luc7-like protein 3 OS=Homo sapiens OX=9606 GN=LUC7L3 PE=1 SV=2	23	5	5	51.4	13	432	9.79		1	1	5	5	4		1	1	5	4	4
High	Q9NX63	MICOS complex subunit MIC19 OS=Homo sapiens OX=9606 GN=CHCHD3 PE=1 SV=1	23	5	5	26.1	25	227	8.28	1	1	1	2	3	3	1	1	1	2	3	3
High	P04439	HLA class I histocompatibility antigen, A alpha chain OS=Homo sapiens OX=9606 GN=HLA-A PE=1 SV=2	23	5	4	40.8	22	365	6	3	3	1	2	3	2	2	2	1	2	2	2
High	P55084	Trifunctional enzyme subunit beta, mitochondrial OS=Homo sapiens OX=9606 GN=HADHB PE=1 SV=3	23	8	8	51.3	23	474	9.41	2	3	2	3	6	3	2	3	2	3	6	3
High	P41212	Transcription factor ETV6 OS=Homo sapiens OX=9606 GN=ETV6 PE=1 SV=1	23	6	6	53	11	452	7.43	1	1	1	2	2	2	1	1	1	2	2	2
High	P24666	Low molecular weight phosphotyrosine protein phosphatase OS=Homo sapiens OX=9606 GN=ACP1 PE=1 SV=3	23	5	5	18	47	158	6.74	2	2	3	1	2	1	2	2	3	1	2	1
High	O43290	U4/U6.U5 tri-snRNP-associated protein 1 OS=Homo sapiens OX=9606 GN=SART1 PE=1 SV=1	23	9	9	90.2	14	800	6.13	2	1		4	2	3	2	1		4	2	3
High	O43813	Glutathione S-transferase LANCL1 OS=Homo sapiens OX=9606 GN=LANCL1 PE=1 SV=1	23	6	6	45.3	16	399	7.75	2		3	1	3	3	2		2	1	3	2
High	O75153	Clustered mitochondria protein homolog OS=Homo sapiens OX=9606 GN=CLUH PE=1 SV=2	23	9	9	146.6	8	1309	6.13	2	2	3		5		2	2	3		5
High	O00170	AH receptor-interacting protein OS=Homo sapiens OX=9606 GN=AIP PE=1 SV=3	23	6	6	37.6	24	330	6.42	1	1	1	2	3	2	1	1	1	2	3	2
High	Q9Y2R4	Probable ATP-dependent RNA helicase DDX52 OS=Homo sapiens OX=9606 GN=DDX52 PE=1 SV=4	23	6	5	67.4	12	599	9.67	1	1	1	2	2	2	1	1	1	2	2	2
High	P50750	Cyclin-dependent kinase 9 OS=Homo sapiens OX=9606 GN=CDK9 PE=1 SV=3	23	5	4	42.8	17	372	8.79	2	4	3	3	3	2	2	3	2	2	2	2
High	P18887	DNA repair protein XRCC1 OS=Homo sapiens OX=9606 GN=XRCC1 PE=1 SV=3	23	5	5	69.5	8	633	6.28	2	2	1	3	3	3	2	2	1	3	3	3
High	Q8IZ83	Aldehyde dehydrogenase family 16 member A1 OS=Homo sapiens OX=9606 GN=ALDH16A1 PE=1 SV=2	22	6	6	85.1	8	802	6.79		1	3	1	3	4		1	3	1	3	4
High	O95747	Serine/threonine-protein kinase OSR1 OS=Homo sapiens OX=9606 GN=OXSR1 PE=1 SV=1	22	6	2	58	11	527	6.43	2	3	2		2	1	2	3	2		2	1
High	O43865	S-adenosylhomocysteine hydrolase-like protein 1 OS=Homo sapiens OX=9606 GN=AHCYL1 PE=1 SV=2	22	6	5	58.9	11	530	6.89	1	1	1	1	1	1	1	1	1	1	1	1
High	Q01581	Hydroxymethylglutaryl-CoA synthase, cytoplasmic OS=Homo sapiens OX=9606 GN=HMGCS1 PE=1 SV=2	22	6	5	57.3	13	520	5.41	1	2	3	3		4	1	2	3	3		4
High	P61421	V-type proton ATPase subunit d 1 OS=Homo sapiens OX=9606 GN=ATP6V0D1 PE=1 SV=1	22	7	7	40.3	28	351	5	4	3	2				4	3	2
High	P09972	Fructose-bisphosphate aldolase C OS=Homo sapiens OX=9606 GN=ALDOC PE=1 SV=2	22	3	2	39.4	9	364	6.87	2	3	3	1	3	2	2	3	3	1	3	2
High	O14929	Histone acetyltransferase type B catalytic subunit OS=Homo sapiens OX=9606 GN=HAT1 PE=1 SV=2	22	4	4	49.5	14	419	5.69	2	2	1	3	2	3	2	2	1	3	2	3
High	Q86U86	Protein polybromo-1 OS=Homo sapiens OX=9606 GN=PBRM1 PE=1 SV=1	22	8	8	192.8	6	1689	6.89				3	5	4				3	5	4
High	P05386	60S acidic ribosomal protein P1 OS=Homo sapiens OX=9606 GN=RPLP1 PE=1 SV=1	22	3	2	11.5	67	114	4.32	3	3	4				1	1	2
High	Q9BY32	Inosine triphosphate pyrophosphatase OS=Homo sapiens OX=9606 GN=ITPA PE=1 SV=2	22	5	5	21.4	45	194	5.66	4	4	4	1	1	1	4	4	3	1	1	1
High	Q53GQ0	Very-long-chain 3-oxoacyl-CoA reductase OS=Homo sapiens OX=9606 GN=HSD17B12 PE=1 SV=2	22	8	8	34.3	30	312	9.32	5	5	3				5	5	3
High	Q8N6T3	ADP-ribosylation factor GTPase-activating protein 1 OS=Homo sapiens OX=9606 GN=ARFGAP1 PE=1 SV=2	22	5	5	44.6	16	406	5.66	1	1	2	3	2	3	1	1	2	3	2	3
High	P35244	Replication protein A 14 kDa subunit OS=Homo sapiens OX=9606 GN=RPA3 PE=1 SV=1	22	4	4	13.6	51	121	5.08	4	5	7	1	1	1	3	4	4	1	1	1
High	Q96EE3	Nucleoporin SEH1 OS=Homo sapiens OX=9606 GN=SEH1L PE=1 SV=3	22	6	6	39.6	23	360	8.09	1	2	2	2	1	2	1	2	2	2	1	2
High	Q12873	Chromodomain-helicase-DNA-binding protein 3 OS=Homo sapiens OX=9606 GN=CHD3 PE=1 SV=3	22	5	1	226.5	4	2000	7.3	1	2	4	1	3	1	1	2	4	1	3	1
High	Q9BYG3	MKI67 FHA domain-interacting nucleolar phosphoprotein OS=Homo sapiens OX=9606 GN=NIFK PE=1 SV=1	22	5	5	34.2	23	293	9.88	1	1	1	2	3	2	1	1	1	2	3	2
High	Q04323	UBX domain-containing protein 1 OS=Homo sapiens OX=9606 GN=UBXN1 PE=1 SV=2	22	4	4	33.3	23	297	5.25	3	1	2	1	3	2	3	1	2	1	3	2
High	O76003	Glutaredoxin-3 OS=Homo sapiens OX=9606 GN=GLRX3 PE=1 SV=2	22	4	4	37.4	13	335	5.39	1	4	2	2	2	2	1	3	2	2	2	2
High	P02686	Myelin basic protein OS=Homo sapiens OX=9606 GN=MBP PE=1 SV=3	22	3	3	33.1	11	304	9.79				6	8	8				3	3	3
High	P17931	Galectin-3 OS=Homo sapiens OX=9606 GN=LGALS3 PE=1 SV=5	22	5	5	26.1	22	250	8.56	4	3	4				4	3	4
High	P43897	Elongation factor Ts, mitochondrial OS=Homo sapiens OX=9606 GN=TSFM PE=1 SV=2	22	6	6	35.4	24	325	8.38	2	1	3	2		2	2	1	3	2		2
High	Q9BTT6	Leucine-rich repeat-containing protein 1 OS=Homo sapiens OX=9606 GN=LRRC1 PE=1 SV=1	22	4	2	59.2	11	524	5.02	4	4	4		1		4	4	4		1
High	Q96RS6	NudC domain-containing protein 1 OS=Homo sapiens OX=9606 GN=NUDCD1 PE=1 SV=2	22	8	8	66.7	16	583	5.11	1	1		2	2	1	1	1		2	2	1
High	Q99798	Aconitate hydratase, mitochondrial OS=Homo sapiens OX=9606 GN=ACO2 PE=1 SV=2	22	7	7	85.4	13	780	7.61	2	2	2	3	2	2	2	2	2	3	2	2
High	Q8N1N4	Keratin, type II cytoskeletal 78 OS=Homo sapiens OX=9606 GN=KRT78 PE=1 SV=2	22	4	1	56.8	7	520	6.02	3	3	5	1	1	1	2	2	4	1	1	1
High	Q86UP2	Kinectin OS=Homo sapiens OX=9606 GN=KTN1 PE=1 SV=1	22	7	7	156.2	6	1357	5.64	2	1	2	1	2	1	2	1	2	1	2	1
High	Q9UJZ1	Stomatin-like protein 2, mitochondrial OS=Homo sapiens OX=9606 GN=STOML2 PE=1 SV=1	22	7	7	38.5	29	356	7.39	2	1	4				2	1	4
High	Q06203	Amidophosphoribosyltransferase OS=Homo sapiens OX=9606 GN=PPAT PE=1 SV=1	22	6	6	57.4	13	517	6.76	1	2	4	2	2	1	1	2	4	2	2	1
High	Q8IWZ3	Ankyrin repeat and KH domain-containing protein 1 OS=Homo sapiens OX=9606 GN=ANKHD1 PE=1 SV=1	21	7	1	269.3	3	2542	5.73			1	2	2	3			1	2	2	3
High	P11172	Uridine 5'-monophosphate synthase OS=Homo sapiens OX=9606 GN=UMPS PE=1 SV=1	21	6	6	52.2	10	480	7.24	1		3		2		1		3		2
High	Q96T51	RUN and FYVE domain-containing protein 1 OS=Homo sapiens OX=9606 GN=RUFY1 PE=1 SV=2	21	7	7	79.8	10	708	5.74		2	2	1	2			2	2	1	2
High	P09382	Galectin-1 OS=Homo sapiens OX=9606 GN=LGALS1 PE=1 SV=2	21	4	4	14.7	28	135	5.5		1	2	2	3	4		1	2	2	3	4
High	O00483	Cytochrome c oxidase subunit NDUFA4 OS=Homo sapiens OX=9606 GN=NDUFA4 PE=1 SV=1	21	3	3	9.4	32	81	9.38	2	2	2	3	3	3	2	2	2	3	3	3
High	Q15050	Ribosome biogenesis regulatory protein homolog OS=Homo sapiens OX=9606 GN=RRS1 PE=1 SV=2	21	6	6	41.2	20	365	10.7	1	1	1	1	2	1	1	1	1	1	2	1
High	O60763	General vesicular transport factor p115 OS=Homo sapiens OX=9606 GN=USO1 PE=1 SV=2	21	8	8	107.8	10	962	4.91	2	1	3	1		1	2	1	3	1		1
High	P20592	Interferon-induced GTP-binding protein Mx2 OS=Homo sapiens OX=9606 GN=MX2 PE=1 SV=1	21	10	10	82	15	715	8.76				6	8	6				6	8	6
High	P54198	Protein HIRA OS=Homo sapiens OX=9606 GN=HIRA PE=1 SV=2	21	8	8	111.8	10	1017	8.07	4	6	3		1	1	4	6	3		1	1
High	P82673	28S ribosomal protein S35, mitochondrial OS=Homo sapiens OX=9606 GN=MRPS35 PE=1 SV=1	21	6	6	36.8	27	323	8.24	1	1	3	1	3	2	1	1	3	1	3	2
High	Q15599	Na(+)/H(+) exchange regulatory cofactor NHE-RF2 OS=Homo sapiens OX=9606 GN=SLC9A3R2 PE=1 SV=2	21	6	6	37.4	23	337	7.93		2	2	1	3	1		2	2	1	3	1
High	Q96A33	PAT complex subunit CCDC47 OS=Homo sapiens OX=9606 GN=CCDC47 PE=1 SV=1	21	5	5	55.8	14	483	4.87	3	5	2				3	3	2
High	Q9Y221	60S ribosome subunit biogenesis protein NIP7 homolog OS=Homo sapiens OX=9606 GN=NIP7 PE=1 SV=1	21	6	6	20.4	38	180	8.51	1	1	1	4	3	2	1	1	1	4	3	2
High	Q00534	Cyclin-dependent kinase 6 OS=Homo sapiens OX=9606 GN=CDK6 PE=1 SV=1	21	4	3	36.9	11	326	6.46	2	3	3	3	2	2	2	2	2	2	1	2
High	O14908	PDZ domain-containing protein GIPC1 OS=Homo sapiens OX=9606 GN=GIPC1 PE=1 SV=2	21	7	7	36	26	333	6.28		1	3		1	1		1	3		1	1
High	P25788	Proteasome subunit alpha type-3 OS=Homo sapiens OX=9606 GN=PSMA3 PE=1 SV=2	21	4	4	28.4	16	255	5.33			2	4	3	3			2	4	3	3
High	P19623	Spermidine synthase OS=Homo sapiens OX=9606 GN=SRM PE=1 SV=1	21	8	8	33.8	38	302	5.49	1	1	2	1		2	1	1	2	1		2
High	P51153	Ras-related protein Rab-13 OS=Homo sapiens OX=9606 GN=RAB13 PE=1 SV=1	21	4	2	22.8	21	203	9.19	2	3	2	2	2	2	2	2	2	2	2	2
High	O43776	Asparagine--tRNA ligase, cytoplasmic OS=Homo sapiens OX=9606 GN=NARS1 PE=1 SV=1	21	8	8	62.9	19	548	6.25		2	4	1	1	1		2	4	1	1	1
High	Q9UJA5	tRNA (adenine(58)-N(1))-methyltransferase non-catalytic subunit TRM6 OS=Homo sapiens OX=9606 GN=TRMT6 PE=1 SV=1	21	6	6	55.8	15	497	7.55	2	2	1	2	1	3	2	2	1	2	1	3
High	Q96QR8	Transcriptional activator protein Pur-beta OS=Homo sapiens OX=9606 GN=PURB PE=1 SV=3	21	5	5	33.2	27	312	5.43	1	1	1	1	2	1	1	1	1	1	2	1
High	P04637	Cellular tumor antigen p53 OS=Homo sapiens OX=9606 GN=TP53 PE=1 SV=4	21	7	7	43.6	27	393	6.79	1		1	2	3	2	1		1	2	3	2
High	Q9UKF6	Cleavage and polyadenylation specificity factor subunit 3 OS=Homo sapiens OX=9606 GN=CPSF3 PE=1 SV=1	21	5	5	77.4	9	684	5.6	2	1	1	2	3	2	2	1	1	2	3	2
High	P13861	cAMP-dependent protein kinase type II-alpha regulatory subunit OS=Homo sapiens OX=9606 GN=PRKAR2A PE=1 SV=2	21	5	5	45.5	15	404	5.07	1	1	2	1	2	2	1	1	2	1	2	2
High	P17029	Zinc finger protein with KRAB and SCAN domains 1 OS=Homo sapiens OX=9606 GN=ZKSCAN1 PE=1 SV=3	21	7	7	63.6	17	563	7.05	4	5	4				4	5	4
High	P48735	Isocitrate dehydrogenase [NADP], mitochondrial OS=Homo sapiens OX=9606 GN=IDH2 PE=1 SV=2	21	7	7	50.9	19	452	8.69	2	2	5	1	1	1	2	2	5	1	1	1
High	P78362	SRSF protein kinase 2 OS=Homo sapiens OX=9606 GN=SRPK2 PE=1 SV=3	21	8	6	77.5	16	688	4.97	1	1	1	4	3	3	1	1	1	4	3	3
High	P46782	40S ribosomal protein S5 OS=Homo sapiens OX=9606 GN=RPS5 PE=1 SV=4	21	4	4	22.9	23	204	9.72	1	2	2	1	1	1	1	2	2	1	1	1
High	Q5H9R7	Serine/threonine-protein phosphatase 6 regulatory subunit 3 OS=Homo sapiens OX=9606 GN=PPP6R3 PE=1 SV=2	21	7	7	97.6	10	873	4.6	2	2	1	1	2	2	2	2	1	1	2	2
High	P61586	Transforming protein RhoA OS=Homo sapiens OX=9606 GN=RHOA PE=1 SV=1	21	4	3	21.8	21	193	6.1	3	3	2	2	2	2	2	2	1	2	2	2
High	P31146	Coronin-1A OS=Homo sapiens OX=9606 GN=CORO1A PE=1 SV=4	21	5	4	51	11	461	6.68	2	2	2	3	4	3	2	2	2	3	4	3
High	P35613	Basigin OS=Homo sapiens OX=9606 GN=BSG PE=1 SV=2	21	5	5	42.2	18	385	5.66	3	3	4		1		3	3	4		1
High	Q7L014	Probable ATP-dependent RNA helicase DDX46 OS=Homo sapiens OX=9606 GN=DDX46 PE=1 SV=2	21	10	10	117.3	10	1031	9.29				2	5	4				2	5	4
High	P40616	ADP-ribosylation factor-like protein 1 OS=Homo sapiens OX=9606 GN=ARL1 PE=1 SV=1	21	6	6	20.4	53	181	5.72	5	2	5	1	1	1	5	2	5	1	1	1
High	P47914	60S ribosomal protein L29 OS=Homo sapiens OX=9606 GN=RPL29 PE=1 SV=2	21	2	2	17.7	14	159	11.66	1	1	2	2	3	3	1	1	1	2	2	2
High	Q14165	Malectin OS=Homo sapiens OX=9606 GN=MLEC PE=1 SV=1	20	6	6	32.2	24	292	5.41			3			1			3			1
High	Q9P2K3	REST corepressor 3 OS=Homo sapiens OX=9606 GN=RCOR3 PE=1 SV=2	20	5	1	55.5	11	495	8.27	1		1	1	2	1	1		1	1	2	1
High	P36507	Dual specificity mitogen-activated protein kinase kinase 2 OS=Homo sapiens OX=9606 GN=MAP2K2 PE=1 SV=1	20	5	3	44.4	15	400	6.55	2	2	2	1	2	1	2	2	2	1	2	1
High	P61513	60S ribosomal protein L37a OS=Homo sapiens OX=9606 GN=RPL37A PE=1 SV=2	20	3	3	10.3	41	92	10.43	1	1	2	2	3	2	1	1	2	2	2	2
High	Q9BRJ6	Uncharacterized protein C7orf50 OS=Homo sapiens OX=9606 GN=C7orf50 PE=1 SV=1	20	5	5	22.1	42	194	9.64			1	5	4	3			1	4	4	3
High	O95486	Protein transport protein Sec24A OS=Homo sapiens OX=9606 GN=SEC24A PE=1 SV=2	20	7	5	119.7	6	1093	7.66				2	3	2				2	3	2
High	Q9NWH9	SAFB-like transcription modulator OS=Homo sapiens OX=9606 GN=SLTM PE=1 SV=2	20	6	6	117.1	8	1034	7.87	2	2	3	1	3	1	2	2	3	1	3	1
High	Q9H4I2	Zinc fingers and homeoboxes protein 3 OS=Homo sapiens OX=9606 GN=ZHX3 PE=1 SV=3	20	7	6	104.6	12	956	6.07				3		2				3		2
High	Q9UKL0	REST corepressor 1 OS=Homo sapiens OX=9606 GN=RCOR1 PE=1 SV=2	20	7	3	53.3	18	485	7.03	1		1	1	1	1	1		1	1	1	1
High	Q13576	Ras GTPase-activating-like protein IQGAP2 OS=Homo sapiens OX=9606 GN=IQGAP2 PE=1 SV=4	20	8	6	180.5	6	1575	5.64	1	2	2	1	1	1	1	1	2	1	1	1
High	P41743	Protein kinase C iota type OS=Homo sapiens OX=9606 GN=PRKCI PE=1 SV=2	20	6	6	68.2	13	596	5.85	2	1	2	2	1	2	2	1	2	2	1	2
High	P55036	26S proteasome non-ATPase regulatory subunit 4 OS=Homo sapiens OX=9606 GN=PSMD4 PE=1 SV=1	20	7	7	40.7	31	377	4.79	1			4	4	4	1			4	4	4
High	O00233	26S proteasome non-ATPase regulatory subunit 9 OS=Homo sapiens OX=9606 GN=PSMD9 PE=1 SV=3	20	6	6	24.7	27	223	6.95	2	1	1	2	1	2	2	1	1	2	1	2
High	Q15020	Squamous cell carcinoma antigen recognized by T-cells 3 OS=Homo sapiens OX=9606 GN=SART3 PE=1 SV=1	20	5	5	109.9	6	963	5.57			1	3	1	2			1	3	1	2
High	P42285	Exosome RNA helicase MTR4 OS=Homo sapiens OX=9606 GN=MTREX PE=1 SV=3	20	9	9	117.7	9	1042	6.52	1			3	2	2	1			3	2	2
High	Q9BT17	Mitochondrial ribosome-associated GTPase 1 OS=Homo sapiens OX=9606 GN=MTG1 PE=1 SV=2	20	3	3	37.2	11	334	9.47	3	3	2	2	2	1	3	3	2	2	2	1
High	O75351	Vacuolar protein sorting-associated protein 4B OS=Homo sapiens OX=9606 GN=VPS4B PE=1 SV=2	20	6	4	49.3	18	444	7.23	1	1	3	1	2	2	1	1	3	1	2	2
High	P23258	Tubulin gamma-1 chain OS=Homo sapiens OX=9606 GN=TUBG1 PE=1 SV=2	20	6	6	51.1	22	451	6.14	5	4	5				4	3	4
High	P10301	Ras-related protein R-Ras OS=Homo sapiens OX=9606 GN=RRAS PE=1 SV=1	20	4	2	23.5	21	218	6.93	3	3	3	1	1	1	3	3	2	1	1	1
High	P61604	10 kDa heat shock protein, mitochondrial OS=Homo sapiens OX=9606 GN=HSPE1 PE=1 SV=2	20	4	4	10.9	38	102	8.92	3	2	4	1	2	3	3	2	4	1	2	3
High	P13807	Glycogen [starch] synthase, muscle OS=Homo sapiens OX=9606 GN=GYS1 PE=1 SV=2	20	5	5	83.7	8	737	6.18	1		1	2	3	2	1		1	2	3	2
High	O94808	Glutamine--fructose-6-phosphate aminotransferase [isomerizing] 2 OS=Homo sapiens OX=9606 GN=GFPT2 PE=1 SV=3	20	4	1	76.9	6	682	7.37	3	3	3	2	1	2	3	3	3	2	1	2
High	P43307	Translocon-associated protein subunit alpha OS=Homo sapiens OX=9606 GN=SSR1 PE=1 SV=3	20	4	4	32.2	21	286	4.49	2	2	4	2		2	2	2	4	2		2
High	P61221	ATP-binding cassette sub-family E member 1 OS=Homo sapiens OX=9606 GN=ABCE1 PE=1 SV=1	20	9	9	67.3	15	599	8.34					3	1					3	1
High	P61626	Lysozyme C OS=Homo sapiens OX=9606 GN=LYZ PE=1 SV=1	20	3	3	16.5	18	148	9.16	3	1	2	2	3	3	3	1	2	2	3	2
High	Q9BW19	Kinesin-like protein KIFC1 OS=Homo sapiens OX=9606 GN=KIFC1 PE=1 SV=2	20	6	6	73.7	11	673	8.98	1			3	2	3	1			3	2	3
High	Q96SI9	Spermatid perinuclear RNA-binding protein OS=Homo sapiens OX=9606 GN=STRBP PE=1 SV=1	20	3	1	73.6	4	672	8.72	2	2	1	2	2	2	2	2	1	2	2	2
High	P31949	Protein S100-A11 OS=Homo sapiens OX=9606 GN=S100A11 PE=1 SV=2	20	4	4	11.7	43	105	7.12	3	3	3	2	1	2	2	2	2	2	1	2
High	P43686	26S proteasome regulatory subunit 6B OS=Homo sapiens OX=9606 GN=PSMC4 PE=1 SV=2	20	9	8	47.3	24	418	5.21	1			2	6	3	1			2	6	3
High	Q9BQG0	Myb-binding protein 1A OS=Homo sapiens OX=9606 GN=MYBBP1A PE=1 SV=2	20	8	8	148.8	7	1328	9.28				1		2				1		2
High	O95163	Elongator complex protein 1 OS=Homo sapiens OX=9606 GN=ELP1 PE=1 SV=3	20	6	6	150.2	6	1332	5.94	2	2	1	1	2	2	2	2	1	1	2	2
High	Q9HAV7	GrpE protein homolog 1, mitochondrial OS=Homo sapiens OX=9606 GN=GRPEL1 PE=1 SV=2	20	4	4	24.3	23	217	8.12	2	3	2	1	1	1	2	3	2	1	1	1
High	P52294	Importin subunit alpha-5 OS=Homo sapiens OX=9606 GN=KPNA1 PE=1 SV=3	20	5	2	60.2	13	538	5.01	2	3	1	2	3	1	2	3	1	2	3	1
High	P35606	Coatomer subunit beta' OS=Homo sapiens OX=9606 GN=COPB2 PE=1 SV=2	20	6	6	102.4	9	906	5.27	3	5	3		1	1	3	4	3		1	1
High	Q14157	Ubiquitin-associated protein 2-like OS=Homo sapiens OX=9606 GN=UBAP2L PE=1 SV=2	20	7	7	114.5	10	1087	7.11	4	5	4				4	5	4
High	Q9NUL3	Double-stranded RNA-binding protein Staufen homolog 2 OS=Homo sapiens OX=9606 GN=STAU2 PE=1 SV=2	20	7	5	62.6	15	570	9.61		1	2	3	2	1		1	2	3	2	1
High	Q8IXI2	Mitochondrial Rho GTPase 1 OS=Homo sapiens OX=9606 GN=RHOT1 PE=1 SV=2	20	5	4	70.7	9	618	6.27		1	1	3	4	3		1	1	3	4	3
High	Q9Y6Y8	SEC23-interacting protein OS=Homo sapiens OX=9606 GN=SEC23IP PE=1 SV=1	20	6	6	111	9	1000	5.54	2	1	2		1	2	2	1	2		1	2
High	P82930	28S ribosomal protein S34, mitochondrial OS=Homo sapiens OX=9606 GN=MRPS34 PE=1 SV=2	20	5	5	25.6	26	218	9.98	1	1	2	1	2	1	1	1	2	1	2	1
High	P61289	Proteasome activator complex subunit 3 OS=Homo sapiens OX=9606 GN=PSME3 PE=1 SV=1	20	4	4	29.5	17	254	5.95	3	2	2	1	2	1	3	2	2	1	2	1
High	Q5T6F2	Ubiquitin-associated protein 2 OS=Homo sapiens OX=9606 GN=UBAP2 PE=1 SV=1	20	7	7	117	9	1119	7.34			1	1	3	1			1	1	3	1
High	P30084	Enoyl-CoA hydratase, mitochondrial OS=Homo sapiens OX=9606 GN=ECHS1 PE=1 SV=4	20	7	7	31.4	33	290	8.07	4	3	3		2	1	4	3	3		2	1
High	Q9NYB9	Abl interactor 2 OS=Homo sapiens OX=9606 GN=ABI2 PE=1 SV=1	19	5	2	55.6	13	513	6.16	1	1	1	1	1	1	1	1	1	1	1	1
High	P78417	Glutathione S-transferase omega-1 OS=Homo sapiens OX=9606 GN=GSTO1 PE=1 SV=2	19	4	4	27.5	16	241	6.6	2	2	1	1	2	2	2	2	1	1	2	2
High	Q9BXJ9	N-alpha-acetyltransferase 15, NatA auxiliary subunit OS=Homo sapiens OX=9606 GN=NAA15 PE=1 SV=1	19	6	6	101.2	8	866	7.42	2	2	1	2	2	2	2	2	1	2	2	2
High	Q08495	Dematin OS=Homo sapiens OX=9606 GN=DMTN PE=1 SV=3	19	6	6	45.5	18	405	8.88	2	2	3				2	2	3
High	Q13257	Mitotic spindle assembly checkpoint protein MAD2A OS=Homo sapiens OX=9606 GN=MAD2L1 PE=1 SV=1	19	4	4	23.5	17	205	5.08	1	2	3	1	3	2	1	2	3	1	3	2
High	O43432	Eukaryotic translation initiation factor 4 gamma 3 OS=Homo sapiens OX=9606 GN=EIF4G3 PE=1 SV=2	19	9	6	176.5	7	1585	5.38		2	2	1	1	1		2	2	1	1	1
High	Q99459	Cell division cycle 5-like protein OS=Homo sapiens OX=9606 GN=CDC5L PE=1 SV=2	19	8	8	92.2	15	802	8.18	3	2	3	1	2	1	3	2	3	1	2	1
High	Q08209	Serine/threonine-protein phosphatase 2B catalytic subunit alpha isoform OS=Homo sapiens OX=9606 GN=PPP3CA PE=1 SV=1	19	5	5	58.7	11	521	5.86	1	1	1	1	2	2	1	1	1	1	2	2
High	Q96T58	Msx2-interacting protein OS=Homo sapiens OX=9606 GN=SPEN PE=1 SV=1	19	3	3	402	1	3664	7.64	3	1	3	2			2	1	2	1
High	Q7Z417	Nuclear fragile X mental retardation-interacting protein 2 OS=Homo sapiens OX=9606 GN=NUFIP2 PE=1 SV=1	19	7	7	76.1	17	695	8.7	1	1	2		3	2	1	1	2		3	2
High	P28072	Proteasome subunit beta type-6 OS=Homo sapiens OX=9606 GN=PSMB6 PE=1 SV=4	19	4	4	25.3	22	239	4.92	2			3	3	2	2			3	3	2
High	Q5GLZ8	Probable E3 ubiquitin-protein ligase HERC4 OS=Homo sapiens OX=9606 GN=HERC4 PE=1 SV=1	19	5	5	118.5	7	1057	6.19	1	2	2		2	2	1	2	2		2	2
High	Q9Y4K1	Beta/gamma crystallin domain-containing protein 1 OS=Homo sapiens OX=9606 GN=CRYBG1 PE=1 SV=3	19	8	8	188.6	7	1723	5.86	5	7	3				5	7	3
High	O15371	Eukaryotic translation initiation factor 3 subunit D OS=Homo sapiens OX=9606 GN=EIF3D PE=1 SV=1	19	5	5	63.9	16	548	6.05	3	3	4		1		3	3	4		1
High	Q5BKZ1	DBIRD complex subunit ZNF326 OS=Homo sapiens OX=9606 GN=ZNF326 PE=1 SV=2	19	5	5	65.6	11	582	5.15	2	2	3	1	2		2	2	2	1	2
High	Q7LBR1	Charged multivesicular body protein 1b OS=Homo sapiens OX=9606 GN=CHMP1B PE=1 SV=1	19	3	3	22.1	12	199	8.1	2	3	3	2	2	2	2	2	2	2	2	2
High	P52888	Thimet oligopeptidase OS=Homo sapiens OX=9606 GN=THOP1 PE=1 SV=2	19	6	6	78.8	10	689	6.05	1	1		2	3	2	1	1		2	3	2
High	O75475	PC4 and SFRS1-interacting protein OS=Homo sapiens OX=9606 GN=PSIP1 PE=1 SV=1	19	9	9	60.1	19	530	9.13	4	2	5		2		3	2	5		2
High	P00973	2'-5'-oligoadenylate synthase 1 OS=Homo sapiens OX=9606 GN=OAS1 PE=1 SV=4	19	5	5	46	13	400	8.22		1	1	3	1	3		1	1	3	1	3
High	Q8N1W1	Rho guanine nucleotide exchange factor 28 OS=Homo sapiens OX=9606 GN=ARHGEF28 PE=1 SV=3	19	8	8	191.8	6	1705	6.04	3	3	8				3	3	8
High	Q0JRZ9	F-BAR domain only protein 2 OS=Homo sapiens OX=9606 GN=FCHO2 PE=1 SV=2	19	6	6	88.9	8	810	6.86	1	2	1	1		1	1	2	1	1		1
High	Q14789	Golgin subfamily B member 1 OS=Homo sapiens OX=9606 GN=GOLGB1 PE=1 SV=2	19	9	8	375.8	3	3259	5		1				1		1				1
High	Q9BZH6	WD repeat-containing protein 11 OS=Homo sapiens OX=9606 GN=WDR11 PE=1 SV=1	19	9	9	136.6	10	1224	6.92		1	1		2			1	1		2
High	O60333	Kinesin-like protein KIF1B OS=Homo sapiens OX=9606 GN=KIF1B PE=1 SV=5	19	6	5	204.3	5	1816	5.6	4	4	4		2		4	4	4		2
High	Q9BYJ9	YTH domain-containing family protein 1 OS=Homo sapiens OX=9606 GN=YTHDF1 PE=1 SV=1	19	5	4	60.8	9	559	8.79	4	4	2	1	2		4	4	2	1	2
High	P62834	Ras-related protein Rap-1A OS=Homo sapiens OX=9606 GN=RAP1A PE=1 SV=1	19	4	2	21	28	184	6.67	2		1	1	3	1	2		1	1	3	1
High	P61020	Ras-related protein Rab-5B OS=Homo sapiens OX=9606 GN=RAB5B PE=1 SV=1	19	5	2	23.7	27	215	8.13	2	3	2	1	2	1	2	3	2	1	2	1
High	O43889	Cyclic AMP-responsive element-binding protein 3 OS=Homo sapiens OX=9606 GN=CREB3 PE=1 SV=2	19	4	4	41.4	14	371	4.91				3	2	3				3	2	3
High	Q9NVE7	4'-phosphopantetheine phosphatase OS=Homo sapiens OX=9606 GN=PANK4 PE=1 SV=1	19	8	8	85.9	12	773	6.28	5	4	6				5	4	6
High	Q8IXB1	DnaJ homolog subfamily C member 10 OS=Homo sapiens OX=9606 GN=DNAJC10 PE=1 SV=2	19	4	4	91	7	793	7.18	1	2	1	2	1	3	1	2	1	2	1	3
High	Q13363	C-terminal-binding protein 1 OS=Homo sapiens OX=9606 GN=CTBP1 PE=1 SV=2	19	4	2	47.5	10	440	6.77	1	1	2	2	1	2	1	1	2	2	1	2
High	Q6DD88	Atlastin-3 OS=Homo sapiens OX=9606 GN=ATL3 PE=1 SV=1	19	7	7	60.5	21	541	5.66	5	3	5				5	3	4
High	Q96PY5	Formin-like protein 2 OS=Homo sapiens OX=9606 GN=FMNL2 PE=1 SV=3	19	10	10	123.2	10	1086	7.4	2	3	2	1		1	2	3	2	1		1
High	P49841	Glycogen synthase kinase-3 beta OS=Homo sapiens OX=9606 GN=GSK3B PE=1 SV=2	19	4	4	46.7	15	420	8.78	2	2	2	3	2	2	2	2	2	3	2	2
High	P28340	DNA polymerase delta catalytic subunit OS=Homo sapiens OX=9606 GN=POLD1 PE=1 SV=2	19	7	6	123.6	7	1107	7.03	2	2	2			1	2	2	2			1
High	P40763	Signal transducer and activator of transcription 3 OS=Homo sapiens OX=9606 GN=STAT3 PE=1 SV=2	18	6	6	88	13	770	6.3	3	2	3		3		3	2	3		3
High	P12763	SWISS-PROT:P12763 (Bos taurus) Alpha-2-HS-glycoprotein precursor	18	4	4	38.4	13	359	5.5	1	1	2	1		1	1	1	2	1		1
High	P52298	Nuclear cap-binding protein subunit 2 OS=Homo sapiens OX=9606 GN=NCBP2 PE=1 SV=1	18	3	3	18	17	156	8.21	1	1	3	2	2	2	1	1	2	2	2	2
High	P82675	28S ribosomal protein S5, mitochondrial OS=Homo sapiens OX=9606 GN=MRPS5 PE=1 SV=2	18	5	5	48	11	430	9.92	1	2		3	1	2	1	2		3	1	2
High	P42685	Tyrosine-protein kinase FRK OS=Homo sapiens OX=9606 GN=FRK PE=1 SV=1	18	3	1	58.2	5	505	6.67	2	3	1	1	2	2	2	2	1	1	2	2
High	Q9Y508	E3 ubiquitin-protein ligase RNF114 OS=Homo sapiens OX=9606 GN=RNF114 PE=1 SV=1	18	5	5	25.7	26	228	7.25		1	1	2	3	2		1	1	2	3	2
High	Q9H0C8	Integrin-linked kinase-associated serine/threonine phosphatase 2C OS=Homo sapiens OX=9606 GN=ILKAP PE=1 SV=1	18	6	6	42.9	15	392	7.09	1	1	2	3		2	1	1	2	3		2
High	O60218	Aldo-keto reductase family 1 member B10 OS=Homo sapiens OX=9606 GN=AKR1B10 PE=1 SV=2	18	5	5	36	16	316	7.84	2	3	2	1	2	2	2	3	2	1	2	2
High	Q15369	Elongin-C OS=Homo sapiens OX=9606 GN=ELOC PE=1 SV=1	18	3	3	12.5	41	112	4.78	2	2	1	1	2	1	2	2	1	1	2	1
High	P40199	Carcinoembryonic antigen-related cell adhesion molecule 6 OS=Homo sapiens OX=9606 GN=CEACAM6 PE=1 SV=4	18	5	4	37.2	24	344	5.82			2			1			2			1
High	P51571	Translocon-associated protein subunit delta OS=Homo sapiens OX=9606 GN=SSR4 PE=1 SV=1	18	4	4	19	31	173	6.15	1	3	4	1	1	1	1	3	3	1	1	1
High	Q9Y295	Developmentally-regulated GTP-binding protein 1 OS=Homo sapiens OX=9606 GN=DRG1 PE=1 SV=1	18	4	4	40.5	13	367	8.9	1		2	1	4	1	1		2	1	4	1
High	Q96SZ5	2-aminoethanethiol dioxygenase OS=Homo sapiens OX=9606 GN=ADO PE=1 SV=2	18	5	5	29.7	19	270	6.04	1	1	2	2	2	2	1	1	2	2	2	2
High	Q9Y570	Protein phosphatase methylesterase 1 OS=Homo sapiens OX=9606 GN=PPME1 PE=1 SV=3	18	7	7	42.3	21	386	5.97	1	2	2	1	1		1	2	2	1	1
High	Q9NWB6	Arginine and glutamate-rich protein 1 OS=Homo sapiens OX=9606 GN=ARGLU1 PE=1 SV=1	18	3	3	33.2	8	273	10.35			3	2	3	2			3	2	3	2
High	Q7L2J0	7SK snRNA methylphosphate capping enzyme OS=Homo sapiens OX=9606 GN=MEPCE PE=1 SV=1	18	6	6	74.3	13	689	9.57	1	1	2	1	2		1	1	2	1	2
High	P49748	Very long-chain specific acyl-CoA dehydrogenase, mitochondrial OS=Homo sapiens OX=9606 GN=ACADVL PE=1 SV=1	18	8	8	70.3	14	655	8.75	1	2	3			1	1	2	3			1
High	P06868	SWISS-PROT:P06868 (Bos taurus) Plasminogen precursor	18	8	8	91.2	18	812	7.5	1	3	1	1	3	3	1	3	1	1	3	3
High	P15559	NAD(P)H dehydrogenase [quinone] 1 OS=Homo sapiens OX=9606 GN=NQO1 PE=1 SV=1	18	5	5	30.8	25	274	8.88	5	4	2	1			4	3	2	1
High	Q07954	Prolow-density lipoprotein receptor-related protein 1 OS=Homo sapiens OX=9606 GN=LRP1 PE=1 SV=2	18	7	7	504.3	2	4544	5.39	1	1	1	1	1		1	1	1	1	1
High	Q92485	Acid sphingomyelinase-like phosphodiesterase 3b OS=Homo sapiens OX=9606 GN=SMPDL3B PE=1 SV=2	18	4	4	50.8	12	455	5.64	3	4	2	1	1	1	3	4	2	1	1	1
High	Q53EL6	Programmed cell death protein 4 OS=Homo sapiens OX=9606 GN=PDCD4 PE=1 SV=2	18	10	10	51.7	31	469	5.21	1	1	2	1		1	1	1	2	1		1
High	P51531	Probable global transcription activator SNF2L2 OS=Homo sapiens OX=9606 GN=SMARCA2 PE=1 SV=2	18	4	1	181.2	3	1590	7.2	2	1	2	2	1	2	2	1	2	2	1	2
High	Q969V3	Nicalin OS=Homo sapiens OX=9606 GN=NCLN PE=1 SV=2	18	3	3	62.9	6	563	6.89	2	2	3		2	3	2	2	3		2	2
High	Q6UB28	Methionine aminopeptidase 1D, mitochondrial OS=Homo sapiens OX=9606 GN=METAP1D PE=1 SV=1	18	2	2	37.1	9	335	6.84	2	2	2	1		2	2	2	2	1		2
High	Q9GZR2	RNA exonuclease 4 OS=Homo sapiens OX=9606 GN=REXO4 PE=1 SV=2	18	5	5	46.6	14	422	9.77				2	2	2				2	2	2
High	P81605	Dermcidin OS=Homo sapiens OX=9606 GN=DCD PE=1 SV=2	18	2	2	11.3	20	110	6.54	1	1	2	4	3	3	1	1	2	2	2	2
High	P23229	Integrin alpha-6 OS=Homo sapiens OX=9606 GN=ITGA6 PE=1 SV=5	18	10	10	126.5	9	1130	6.61	3	1	4	1	1	1	3	1	4	1	1	1
High	O75340	Programmed cell death protein 6 OS=Homo sapiens OX=9606 GN=PDCD6 PE=1 SV=1	18	6	6	21.9	44	191	5.4	6	3	3		1		6	3	3		1
High	Q969Q0	60S ribosomal protein L36a-like OS=Homo sapiens OX=9606 GN=RPL36AL PE=1 SV=3	18	3	1	12.5	24	106	10.65	1	1	1	2	3	2	1	1	1	2	3	2
High	Q13418	Integrin-linked protein kinase OS=Homo sapiens OX=9606 GN=ILK PE=1 SV=2	18	4	4	51.4	8	452	8.07	3	2	3		1	1	3	2	3		1	1
High	Q9UGV2	Protein NDRG3 OS=Homo sapiens OX=9606 GN=NDRG3 PE=1 SV=2	18	4	4	41.4	14	375	5.31	3	2	1	1	2	1	3	2	1	1	2	1
High	Q6P1Q9	tRNA N(3)-methylcytidine methyltransferase METTL2B OS=Homo sapiens OX=9606 GN=METTL2B PE=1 SV=3	18	5	5	43.4	13	378	5.86	1	1	1	3	1	2	1	1	1	3	1	2
High	P61088	Ubiquitin-conjugating enzyme E2 N OS=Homo sapiens OX=9606 GN=UBE2N PE=1 SV=1	18	6	6	17.1	47	152	6.57	3	3	2	1	3	2	3	3	2	1	3	2
High	Q9Y676	28S ribosomal protein S18b, mitochondrial OS=Homo sapiens OX=9606 GN=MRPS18B PE=1 SV=1	18	3	3	29.4	15	258	9.38	1		2	2	2	3	1		2	2	2	3
High	Q92526	T-complex protein 1 subunit zeta-2 OS=Homo sapiens OX=9606 GN=CCT6B PE=1 SV=5	18	5	1	57.8	9	530	7.24	3	3	2	1	3	1	3	3	2	1	3	1
High	P82933	28S ribosomal protein S9, mitochondrial OS=Homo sapiens OX=9606 GN=MRPS9 PE=1 SV=2	18	6	6	45.8	19	396	9.51	2		2	1	1		2		2	1	1
High	Q8WVY7	Ubiquitin-like domain-containing CTD phosphatase 1 OS=Homo sapiens OX=9606 GN=UBLCP1 PE=1 SV=2	18	6	6	36.8	17	318	6.46	1	1	2	2	6	2	1	1	1	2	6	2
High	Q14562	ATP-dependent RNA helicase DHX8 OS=Homo sapiens OX=9606 GN=DHX8 PE=1 SV=1	18	3	2	139.2	2	1220	8.32	1	1	1	3	3	3	1	1	1	2	2	2
High	Q16401	26S proteasome non-ATPase regulatory subunit 5 OS=Homo sapiens OX=9606 GN=PSMD5 PE=1 SV=3	18	6	6	56.2	15	504	5.48	5	3	5				5	3	5
High	Q6P1M3	LLGL scribble cell polarity complex component 2 OS=Homo sapiens OX=9606 GN=LLGL2 PE=1 SV=2	18	5	5	113.4	6	1020	7.52	1	2	1	2	1	1	1	2	1	2	1	1
High	Q8NBF2	NHL repeat-containing protein 2 OS=Homo sapiens OX=9606 GN=NHLRC2 PE=1 SV=1	18	7	7	79.4	10	726	5.55		2	1	3	1	1		2	1	3	1	1
High	O75381	Peroxisomal membrane protein PEX14 OS=Homo sapiens OX=9606 GN=PEX14 PE=1 SV=1	17	4	4	41.2	16	377	4.94	2	3	4				2	3	4
High	Q86YP4	Transcriptional repressor p66-alpha OS=Homo sapiens OX=9606 GN=GATAD2A PE=1 SV=1	17	4	3	68	9	633	9.94	1	1	2		4	1	1	1	2		4	1
High	Q9Y6N5	Sulfide:quinone oxidoreductase, mitochondrial OS=Homo sapiens OX=9606 GN=SQOR PE=1 SV=1	17	6	6	49.9	18	450	9.11	3	5	3				3	5	3
High	Q8IYQ7	Threonine synthase-like 1 OS=Homo sapiens OX=9606 GN=THNSL1 PE=1 SV=2	17	6	6	83	11	743	7.12	1	1	1	2	2		1	1	1	2	2
High	Q15262	Receptor-type tyrosine-protein phosphatase kappa OS=Homo sapiens OX=9606 GN=PTPRK PE=1 SV=2	17	6	6	162	6	1439	5.9	1	1	1		1	1	1	1	1		1	1
High	P27449	V-type proton ATPase 16 kDa proteolipid subunit c OS=Homo sapiens OX=9606 GN=ATP6V0C PE=1 SV=1	17	1	1	15.7	12	155	8.44	1	1	1		1		1	1	1		1
High	Q9UJV9	Probable ATP-dependent RNA helicase DDX41 OS=Homo sapiens OX=9606 GN=DDX41 PE=1 SV=2	17	7	7	69.8	11	622	6.84	2	1		4	5	3	2	1		4	5	3
High	P62714	Serine/threonine-protein phosphatase 2A catalytic subunit beta isoform OS=Homo sapiens OX=9606 GN=PPP2CB PE=1 SV=1	17	5	5	35.6	22	309	5.43	1	1	1		2	2	1	1	1		2	2
High	P49720	Proteasome subunit beta type-3 OS=Homo sapiens OX=9606 GN=PSMB3 PE=1 SV=2	17	5	5	22.9	25	205	6.55	2	1	1	3	4	2	2	1	1	3	4	2
High	O75131	Copine-3 OS=Homo sapiens OX=9606 GN=CPNE3 PE=1 SV=1	17	4	3	60.1	9	537	5.85	1	1	2	1	1	3	1	1	2	1	1	3
High	P39656	Dolichyl-diphosphooligosaccharide--protein glycosyltransferase 48 kDa subunit OS=Homo sapiens OX=9606 GN=DDOST PE=1 SV=4	17	7	7	50.8	23	456	6.55	4	2	4	1	2	1	4	2	4	1	2	1
High	P82932	28S ribosomal protein S6, mitochondrial OS=Homo sapiens OX=9606 GN=MRPS6 PE=1 SV=3	17	4	4	14.2	30	125	9.26	1	1		2	2	2	1	1		2	2	2
High	Q9BSJ8	Extended synaptotagmin-1 OS=Homo sapiens OX=9606 GN=ESYT1 PE=1 SV=1	17	4	4	122.8	5	1104	5.83	1	2	3	1	1	2	1	2	3	1	1	2
High	P00403	Cytochrome c oxidase subunit 2 OS=Homo sapiens OX=9606 GN=MT-CO2 PE=1 SV=1	17	4	4	25.5	23	227	4.82	3	3	3	1	1		3	3	3	1	1
High	Q9Y2F5	Little elongation complex subunit 1 OS=Homo sapiens OX=9606 GN=ICE1 PE=1 SV=5	17	8	8	247.7	5	2266	5.48				2	2	5				2	2	5
High	Q9NRF8	CTP synthase 2 OS=Homo sapiens OX=9606 GN=CTPS2 PE=1 SV=1	17	7	6	65.6	15	586	6.9	2	2	1	1		1	2	2	1	1		1
High	P53634	Dipeptidyl peptidase 1 OS=Homo sapiens OX=9606 GN=CTSC PE=1 SV=2	17	5	5	51.8	16	463	6.99	2	1	3	1	1	2	2	1	3	1	1	2
High	Q8NBQ5	Estradiol 17-beta-dehydrogenase 11 OS=Homo sapiens OX=9606 GN=HSD17B11 PE=1 SV=3	17	5	5	32.9	19	300	9.07	1		3		1		1		3		1
High	Q9H2D6	TRIO and F-actin-binding protein OS=Homo sapiens OX=9606 GN=TRIOBP PE=1 SV=3	17	5	5	261.2	3	2365	8.48	3	3	4		1		3	3	4		1
High	P84098	60S ribosomal protein L19 OS=Homo sapiens OX=9606 GN=RPL19 PE=1 SV=1	17	3	3	23.5	18	196	11.47	3	2	1	1	2	2	3	1	1	1	2	2
High	P49721	Proteasome subunit beta type-2 OS=Homo sapiens OX=9606 GN=PSMB2 PE=1 SV=1	17	3	3	22.8	12	201	7.02				3	3	3				3	3	3
High	Q9BY43	Charged multivesicular body protein 4a OS=Homo sapiens OX=9606 GN=CHMP4A PE=1 SV=3	17	4	4	25.1	22	222	4.7	1	1	1				1	1	1
High	Q96PV6	Leukocyte receptor cluster member 8 OS=Homo sapiens OX=9606 GN=LENG8 PE=1 SV=3	17	7	7	88.1	15	800	9.11	3	2	2		1		3	2	2		1
High	Q92572	AP-3 complex subunit sigma-1 OS=Homo sapiens OX=9606 GN=AP3S1 PE=1 SV=1	17	4	4	21.7	23	193	5.39	1	1	3	1	2	1	1	1	3	1	2	1
High	Q9Y2Q3	Glutathione S-transferase kappa 1 OS=Homo sapiens OX=9606 GN=GSTK1 PE=1 SV=3	17	3	3	25.5	18	226	8.41	2	2	3	1	1	1	2	2	3	1	1	1
High	Q92785	Zinc finger protein ubi-d4 OS=Homo sapiens OX=9606 GN=DPF2 PE=1 SV=2	17	5	5	44.1	17	391	6.33	3	1	1		1		3	1	1		1
High	Q8NBS9	Thioredoxin domain-containing protein 5 OS=Homo sapiens OX=9606 GN=TXNDC5 PE=1 SV=2	17	5	5	47.6	15	432	5.97	1	1	2	2		1	1	1	2	2		1
High	P12036	Neurofilament heavy polypeptide OS=Homo sapiens OX=9606 GN=NEFH PE=1 SV=4	17	4	1	112.4	3	1026	6.18	1	1	2	3	4	3	1	1	2	3	3	3
High	P14678	Small nuclear ribonucleoprotein-associated proteins B and B' OS=Homo sapiens OX=9606 GN=SNRPB PE=1 SV=2	17	4	4	24.6	15	240	11.19	3	2	2		3	1	3	2	2		2	1
High	Q8WUJ3	Cell migration-inducing and hyaluronan-binding protein OS=Homo sapiens OX=9606 GN=CEMIP PE=1 SV=2	17	7	7	152.9	7	1361	7.85	4	4	7				4	4	6
High	Q9Y4F1	FERM, ARHGEF and pleckstrin domain-containing protein 1 OS=Homo sapiens OX=9606 GN=FARP1 PE=1 SV=1	17	6	6	118.6	8	1045	8.15	3	3	3	2		1	3	3	3	2		1
High	Q7Z5K2	Wings apart-like protein homolog OS=Homo sapiens OX=9606 GN=WAPL PE=1 SV=1	17	7	7	132.9	7	1190	5.44	1	1		3	2	1	1	1		3	2	1
High	P82663	28S ribosomal protein S25, mitochondrial OS=Homo sapiens OX=9606 GN=MRPS25 PE=1 SV=1	17	4	4	20.1	29	173	8.82	1	1	1	1	2		1	1	1	1	2
High	Q8IXT5	RNA-binding protein 12B OS=Homo sapiens OX=9606 GN=RBM12B PE=1 SV=2	17	6	6	118	6	1001	6.81	5	6	2				5	6	2
High	Q5T1R4	Transcription factor HIVEP3 OS=Homo sapiens OX=9606 GN=HIVEP3 PE=2 SV=1	17	6	3	259.3	3	2406	7.81				4	4	5				4	4	5
High	O95671	Probable bifunctional dTTP/UTP pyrophosphatase/methyltransferase protein OS=Homo sapiens OX=9606 GN=ASMTL PE=1 SV=3	17	5	5	68.8	12	621	6.07	1	1	2	1	1	1	1	1	2	1	1	1
High	P61011	Signal recognition particle 54 kDa protein OS=Homo sapiens OX=9606 GN=SRP54 PE=1 SV=1	17	5	5	55.7	10	504	8.75	1		1	2	2	3	1		1	2	2	3
High	Q96FZ2	Abasic site processing protein HMCES OS=Homo sapiens OX=9606 GN=HMCES PE=1 SV=1	17	5	5	40.5	15	354	8.15	3	2	1	2	1	2	3	2	1	2	1	2
High	Q9P2N5	RNA-binding protein 27 OS=Homo sapiens OX=9606 GN=RBM27 PE=1 SV=2	17	6	5	118.6	6	1060	9.19				1	2	1				1	2	1
High	Q13464	Rho-associated protein kinase 1 OS=Homo sapiens OX=9606 GN=ROCK1 PE=1 SV=1	17	4	1	158.1	3	1354	5.9		1	2	1	1	2		1	2	1	1	2
High	O95571	Persulfide dioxygenase ETHE1, mitochondrial OS=Homo sapiens OX=9606 GN=ETHE1 PE=1 SV=2	17	6	6	27.9	36	254	6.83	2	2	1		1		2	2	1		1
High	Q8IYB5	Stromal membrane-associated protein 1 OS=Homo sapiens OX=9606 GN=SMAP1 PE=1 SV=2	17	5	5	50.4	15	467	8.75	1	1	2	1	2	2	1	1	2	1	2	2
High	P20839	Inosine-5'-monophosphate dehydrogenase 1 OS=Homo sapiens OX=9606 GN=IMPDH1 PE=1 SV=2	17	4	3	55.4	11	514	6.9		1		2	3	3		1		2	3	3
High	P02786	Transferrin receptor protein 1 OS=Homo sapiens OX=9606 GN=TFRC PE=1 SV=2	17	8	8	84.8	13	760	6.61		2	2	1		1		2	2	1		1
High	P08579	U2 small nuclear ribonucleoprotein B'' OS=Homo sapiens OX=9606 GN=SNRPB2 PE=1 SV=1	17	3	1	25.5	12	225	9.72	2	1	1	1	3	2	2	1	1	1	2	2
High	P46379	Large proline-rich protein BAG6 OS=Homo sapiens OX=9606 GN=BAG6 PE=1 SV=2	17	5	5	119.3	7	1132	5.6				3	2	4				3	2	4
High	Q13243	Serine/arginine-rich splicing factor 5 OS=Homo sapiens OX=9606 GN=SRSF5 PE=1 SV=1	17	5	4	31.2	25	272	11.59	2	2	1	2		2	2	2	1	2		2
High	O00330	Pyruvate dehydrogenase protein X component, mitochondrial OS=Homo sapiens OX=9606 GN=PDHX PE=1 SV=3	16	5	5	54.1	12	501	8.66		1		1	1			1		1	1
High	Q14651	Plastin-1 OS=Homo sapiens OX=9606 GN=PLS1 PE=1 SV=2	16	5	1	70.2	11	629	5.41	2	2	2	1	2	2	2	2	2	1	2	2
High	Q96ST3	Paired amphipathic helix protein Sin3a OS=Homo sapiens OX=9606 GN=SIN3A PE=1 SV=2	16	8	8	145.1	6	1273	7.25				1	3	1				1	3	1
High	Q9NXH8	Torsin-4A OS=Homo sapiens OX=9606 GN=TOR4A PE=1 SV=2	16	6	6	46.9	15	423	9.94	1		4		2	1	1		4		2	1
High	Q9BPX5	Actin-related protein 2/3 complex subunit 5-like protein OS=Homo sapiens OX=9606 GN=ARPC5L PE=1 SV=1	16	4	3	16.9	34	153	6.6	2	2	1	1	2	1	2	2	1	1	1	1
High	Q5JPE7	Nodal modulator 2 OS=Homo sapiens OX=9606 GN=NOMO2 PE=1 SV=1	16	4	4	139.4	3	1267	5.76	3	3	2				3	3	2
High	Q06330	Recombining binding protein suppressor of hairless OS=Homo sapiens OX=9606 GN=RBPJ PE=1 SV=3	16	5	5	55.6	12	500	7.18				2	3	3				2	3	3
High	Q96GM8	Target of EGR1 protein 1 OS=Homo sapiens OX=9606 GN=TOE1 PE=1 SV=1	16	4	4	56.5	13	510	7.18	2	1	2	1	1	1	2	1	2	1	1	1
High	Q92922	SWI/SNF complex subunit SMARCC1 OS=Homo sapiens OX=9606 GN=SMARCC1 PE=1 SV=3	16	5	3	122.8	7	1105	5.76			1		1	1			1		1	1
High	P09525	Annexin A4 OS=Homo sapiens OX=9606 GN=ANXA4 PE=1 SV=4	16	5	5	35.9	16	319	6.13	2	2	1	1	1	2	2	2	1	1	1	2
High	P10620	Microsomal glutathione S-transferase 1 OS=Homo sapiens OX=9606 GN=MGST1 PE=1 SV=1	16	3	3	17.6	26	155	9.39	3	3	3		1		3	3	3		1
High	Q96EP5	DAZ-associated protein 1 OS=Homo sapiens OX=9606 GN=DAZAP1 PE=1 SV=1	16	3	3	43.4	10	407	8.56	2	2	2	1	2	1	2	2	2	1	2	1
High	P09234	U1 small nuclear ribonucleoprotein C OS=Homo sapiens OX=9606 GN=SNRPC PE=1 SV=1	16	2	2	17.4	19	159	9.67	1	2	2	2	2	2	1	2	2	2	2	2
High	A8CG34	Nuclear envelope pore membrane protein POM 121C OS=Homo sapiens OX=9606 GN=POM121C PE=1 SV=3	16	5	5	125	6	1229	10.37			1		1	1			1		1	1
High	Q96P47	Arf-GAP with GTPase, ANK repeat and PH domain-containing protein 3 OS=Homo sapiens OX=9606 GN=AGAP3 PE=1 SV=2	16	3	3	95	5	875	7.97	2	3	3	1	1	1	2	3	2	1	1	1
High	O00182	Galectin-9 OS=Homo sapiens OX=9606 GN=LGALS9 PE=1 SV=2	16	5	2	39.5	15	355	9.17	1		1	2	3	2	1		1	2	3	2
High	Q9GZS3	WD repeat-containing protein 61 OS=Homo sapiens OX=9606 GN=WDR61 PE=1 SV=1	16	4	4	33.6	14	305	5.47	1	2	3		2	1	1	2	3		2	1
High	Q96A65	Exocyst complex component 4 OS=Homo sapiens OX=9606 GN=EXOC4 PE=1 SV=1	16	8	8	110.4	11	974	6.49	5	4	5				5	4	5
High	O60925	Prefoldin subunit 1 OS=Homo sapiens OX=9606 GN=PFDN1 PE=1 SV=2	16	3	3	14.2	21	122	6.81		1	1	3	1	3		1	1	3	1	3
High	Q6P996	Pyridoxal-dependent decarboxylase domain-containing protein 1 OS=Homo sapiens OX=9606 GN=PDXDC1 PE=1 SV=2	16	7	7	86.7	12	788	5.38	2	1	3		1		2	1	3		1
High	Q96DN6	Methyl-CpG-binding domain protein 6 OS=Homo sapiens OX=9606 GN=MBD6 PE=1 SV=2	16	6	6	101.1	10	1003	9.63				3	2	2				3	2	2
High	Q13404	Ubiquitin-conjugating enzyme E2 variant 1 OS=Homo sapiens OX=9606 GN=UBE2V1 PE=1 SV=2	16	3	3	16.5	18	147	7.93	1	1		2	3	2	1	1		2	3	2
High	P12277	Creatine kinase B-type OS=Homo sapiens OX=9606 GN=CKB PE=1 SV=1	16	4	4	42.6	20	381	5.59	2	3	1				2	3	1
High	P27361	Mitogen-activated protein kinase 3 OS=Homo sapiens OX=9606 GN=MAPK3 PE=1 SV=4	16	4	1	43.1	15	379	6.74		1	2	1	1	2		1	2	1	1	2
High	O60762	Dolichol-phosphate mannosyltransferase subunit 1 OS=Homo sapiens OX=9606 GN=DPM1 PE=1 SV=1	16	6	6	29.6	28	260	9.57	3	2	5				3	2	5
High	Q96SQ9	Cytochrome P450 2S1 OS=Homo sapiens OX=9606 GN=CYP2S1 PE=1 SV=2	16	4	4	55.8	8	504	8.62	4	4	3				4	4	3
High	Q99828	Calcium and integrin-binding protein 1 OS=Homo sapiens OX=9606 GN=CIB1 PE=1 SV=4	16	3	3	21.7	20	191	4.78	2	2	2		1		2	2	2		1
High	Q9NZJ9	Diphosphoinositol polyphosphate phosphohydrolase 2 OS=Homo sapiens OX=9606 GN=NUDT4 PE=1 SV=2	16	4	4	20.3	31	180	6.35	2	5	2		1		2	4	2		1
High	Q9UN37	Vacuolar protein sorting-associated protein 4A OS=Homo sapiens OX=9606 GN=VPS4A PE=1 SV=1	16	4	2	48.9	11	437	7.8		1		1	2	2		1		1	2	2
High	P42338	Phosphatidylinositol 4,5-bisphosphate 3-kinase catalytic subunit beta isoform OS=Homo sapiens OX=9606 GN=PIK3CB PE=1 SV=1	16	5	5	122.7	5	1070	7.09	4	3	3		1	1	4	3	3		1	1
High	P52701	DNA mismatch repair protein Msh6 OS=Homo sapiens OX=9606 GN=MSH6 PE=1 SV=2	16	8	8	152.7	7	1360	6.9		1		1		1		1		1		1
High	P31939	Bifunctional purine biosynthesis protein ATIC OS=Homo sapiens OX=9606 GN=ATIC PE=1 SV=3	16	8	8	64.6	18	592	6.71	2	2	4				2	2	4
High	O95373	Importin-7 OS=Homo sapiens OX=9606 GN=IPO7 PE=1 SV=1	16	10	10	119.4	13	1038	4.82	5	2	3		1		5	2	3		1
High	P35250	Replication factor C subunit 2 OS=Homo sapiens OX=9606 GN=RFC2 PE=1 SV=3	16	7	7	39.1	23	354	6.44	1	1		1	3	1	1	1		1	3	1
High	Q9UI30	Multifunctional methyltransferase subunit TRM112-like protein OS=Homo sapiens OX=9606 GN=TRMT112 PE=1 SV=1	16	2	2	14.2	22	125	5.26	2	1	1	2	2	2	2	1	1	2	2	2
High	O43148	mRNA cap guanine-N7 methyltransferase OS=Homo sapiens OX=9606 GN=RNMT PE=1 SV=1	16	4	4	54.8	10	476	6.61		1	3	2	1	1		1	3	2	1	1
High	Q14919	Dr1-associated corepressor OS=Homo sapiens OX=9606 GN=DRAP1 PE=1 SV=3	16	3	3	22.3	21	205	5.17	1	2	2	1	1	2	1	2	2	1	1	2
High	P83881	60S ribosomal protein L36a OS=Homo sapiens OX=9606 GN=RPL36A PE=1 SV=2	16	3	1	12.4	24	106	10.58	1	1	1	2	3	2	1	1	1	2	3	2
High	O15446	DNA-directed RNA polymerase I subunit RPA34 OS=Homo sapiens OX=9606 GN=POLR1G PE=1 SV=1	16	5	5	55	15	510	8.51			1	1	2	1			1	1	2	1
High	Q14451	Growth factor receptor-bound protein 7 OS=Homo sapiens OX=9606 GN=GRB7 PE=1 SV=2	16	7	7	59.6	18	532	8.5	4	2	1	1			4	2	1	1
High	P08174	Complement decay-accelerating factor OS=Homo sapiens OX=9606 GN=CD55 PE=1 SV=4	16	4	4	41.4	9	381	7.59	2	2	1				2	2	1
High	Q8TBC3	SH3KBP1-binding protein 1 OS=Homo sapiens OX=9606 GN=SHKBP1 PE=1 SV=2	16	4	3	76.3	8	707	8.28				3	2	3				3	2	3
High	Q9NQC3	Reticulon-4 OS=Homo sapiens OX=9606 GN=RTN4 PE=1 SV=2	16	5	5	129.9	8	1192	4.5	1	2	2		1		1	2	1		1
High	P50238	Cysteine-rich protein 1 OS=Homo sapiens OX=9606 GN=CRIP1 PE=1 SV=3	16	3	3	8.5	56	77	8.75	3	2	2		2	1	1	2	2		2	1
High	O43447	Peptidyl-prolyl cis-trans isomerase H OS=Homo sapiens OX=9606 GN=PPIH PE=1 SV=1	16	4	4	19.2	23	177	8.07	2	1	2	1	1	1	2	1	2	1	1	1
High	Q9NRX3	NADH dehydrogenase [ubiquinone] 1 alpha subcomplex subunit 4-like 2 OS=Homo sapiens OX=9606 GN=NDUFA4L2 PE=3 SV=1	16	3	3	10	29	87	9.92	1	3	3				1	3	3
High	Q9P0J7	E3 ubiquitin-protein ligase KCMF1 OS=Homo sapiens OX=9606 GN=KCMF1 PE=1 SV=2	16	4	4	41.9	19	381	5.66	1	1	1	1	1	1	1	1	1	1	1	1
High	Q9C0J8	pre-mRNA 3' end processing protein WDR33 OS=Homo sapiens OX=9606 GN=WDR33 PE=1 SV=2	15	5	5	145.8	6	1336	9.17				2	3	2				2	3	2
High	Q86SX6	Glutaredoxin-related protein 5, mitochondrial OS=Homo sapiens OX=9606 GN=GLRX5 PE=1 SV=2	15	3	3	16.6	28	157	6.79	2	1	1	1	2	1	2	1	1	1	2	1
High	P08621	U1 small nuclear ribonucleoprotein 70 kDa OS=Homo sapiens OX=9606 GN=SNRNP70 PE=1 SV=2	15	4	4	51.5	12	437	9.94	1	1	2	1	1	1	1	1	2	1	1	1
High	O43760	Synaptogyrin-2 OS=Homo sapiens OX=9606 GN=SYNGR2 PE=1 SV=1	15	4	4	24.8	17	224	4.94	2	3	1		1		2	3	1		1
High	Q9NTK5	Obg-like ATPase 1 OS=Homo sapiens OX=9606 GN=OLA1 PE=1 SV=2	15	5	5	44.7	11	396	7.81			1	2	1	1			1	2	1	1
High	Q9UBC2	Epidermal growth factor receptor substrate 15-like 1 OS=Homo sapiens OX=9606 GN=EPS15L1 PE=1 SV=1	15	5	5	94.2	5	864	5.11			3		1	1			3		1	1
High	Q99615	DnaJ homolog subfamily C member 7 OS=Homo sapiens OX=9606 GN=DNAJC7 PE=1 SV=2	15	6	6	56.4	15	494	6.96	1	1	1	2	1	3	1	1	1	2	1	3
High	P25787	Proteasome subunit alpha type-2 OS=Homo sapiens OX=9606 GN=PSMA2 PE=1 SV=2	15	4	4	25.9	23	234	7.43	1	1	1	2	3	2	1	1	1	2	2	2
High	Q13769	THO complex subunit 5 homolog OS=Homo sapiens OX=9606 GN=THOC5 PE=1 SV=2	15	5	5	78.5	9	683	6.87	1	1		1		1	1	1		1		1
High	Q7Z434	Mitochondrial antiviral-signaling protein OS=Homo sapiens OX=9606 GN=MAVS PE=1 SV=2	15	4	4	56.5	12	540	5.52	1	2		1	2	2	1	2		1	2	2
High	Q13098	COP9 signalosome complex subunit 1 OS=Homo sapiens OX=9606 GN=GPS1 PE=1 SV=4	15	6	6	55.5	16	491	6.74	1	1		1	1	1	1	1		1	1	1
High	O94916	Nuclear factor of activated T-cells 5 OS=Homo sapiens OX=9606 GN=NFAT5 PE=1 SV=1	15	7	7	165.7	7	1531	5.24	2	2	8				2	2	7
High	Q8TF72	Protein Shroom3 OS=Homo sapiens OX=9606 GN=SHROOM3 PE=1 SV=2	15	8	8	216.7	7	1996	7.8			1		1				1		1
High	O15551	Claudin-3 OS=Homo sapiens OX=9606 GN=CLDN3 PE=1 SV=1	15	3	3	23.3	15	220	8.05		1	2	2	2	2		1	2	2	2	2
High	Q9UKY1	Zinc fingers and homeoboxes protein 1 OS=Homo sapiens OX=9606 GN=ZHX1 PE=1 SV=1	15	6	6	98	15	873	6.05	1		1				1		1
High	Q8IY37	Probable ATP-dependent RNA helicase DHX37 OS=Homo sapiens OX=9606 GN=DHX37 PE=1 SV=1	15	8	8	129.5	8	1157	8.1	2	1	1	1	2	2	2	1	1	1	2	2
High	Q96FQ6	Protein S100-A16 OS=Homo sapiens OX=9606 GN=S100A16 PE=1 SV=1	15	3	3	11.8	34	103	6.79	2	2	3	1	1	1	2	2	1	1	1	1
High	P47985	Cytochrome b-c1 complex subunit Rieske, mitochondrial OS=Homo sapiens OX=9606 GN=UQCRFS1 PE=1 SV=2	15	5	1	29.6	20	274	8.32	3	1	4	2	1	1	3	1	4	2	1	1
High	Q9ULW0	Targeting protein for Xklp2 OS=Homo sapiens OX=9606 GN=TPX2 PE=1 SV=2	15	7	7	85.6	15	747	9.23	1	1	1				1	1	1
High	Q9UKB1	F-box/WD repeat-containing protein 11 OS=Homo sapiens OX=9606 GN=FBXW11 PE=1 SV=1	15	6	6	62.1	11	542	7.12				3	5	3				3	5	3
High	P53677	AP-3 complex subunit mu-2 OS=Homo sapiens OX=9606 GN=AP3M2 PE=1 SV=1	15	3	1	46.9	9	418	7.56	2	2	2	1	2	1	2	2	2	1	2	1
High	P83916	Chromobox protein homolog 1 OS=Homo sapiens OX=9606 GN=CBX1 PE=1 SV=1	15	2	1	21.4	15	185	4.93	2	2	1		1		1	1	1		1
High	P48634	Protein PRRC2A OS=Homo sapiens OX=9606 GN=PRRC2A PE=1 SV=3	15	6	6	228.7	6	2157	9.45			1	1	1	2			1	1	1	2
High	Q9UNS2	COP9 signalosome complex subunit 3 OS=Homo sapiens OX=9606 GN=COPS3 PE=1 SV=3	15	5	5	47.8	17	423	6.65	1	1	2	1	2	1	1	1	2	1	2	1
High	Q6UN15	Pre-mRNA 3'-end-processing factor FIP1 OS=Homo sapiens OX=9606 GN=FIP1L1 PE=1 SV=1	15	5	5	66.5	13	594	5.59	1	2		1	2	3	1	2		1	2	3
High	O60216	Double-strand-break repair protein rad21 homolog OS=Homo sapiens OX=9606 GN=RAD21 PE=1 SV=2	15	5	5	71.6	9	631	4.65	2	2	1	2	1		2	2	1	2	1
High	Q8N0W3	L-fucose kinase OS=Homo sapiens OX=9606 GN=FCSK PE=1 SV=2	15	6	6	117.5	8	1084	6.25	5	6	3				5	6	3
High	P28070	Proteasome subunit beta type-4 OS=Homo sapiens OX=9606 GN=PSMB4 PE=1 SV=4	15	3	3	29.2	13	264	5.97	1	1	1	3	3	3	1	1	1	3	3	3
High	Q07021	Complement component 1 Q subcomponent-binding protein, mitochondrial OS=Homo sapiens OX=9606 GN=C1QBP PE=1 SV=1	15	4	4	31.3	26	282	4.84	1	2	3		2		1	2	3		2
High	Q9NZZ3	Charged multivesicular body protein 5 OS=Homo sapiens OX=9606 GN=CHMP5 PE=1 SV=1	15	3	3	24.6	20	219	4.83	2	2	1		1	1	2	2	1		1	1
High	Q9NZN5	Rho guanine nucleotide exchange factor 12 OS=Homo sapiens OX=9606 GN=ARHGEF12 PE=1 SV=1	15	8	8	173.1	7	1544	5.74
High	P37198	Nuclear pore glycoprotein p62 OS=Homo sapiens OX=9606 GN=NUP62 PE=1 SV=3	15	6	6	53.2	19	522	5.31	1	1		1	1	1	1	1		1	1	1
High	Q15942	Zyxin OS=Homo sapiens OX=9606 GN=ZYX PE=1 SV=1	15	6	6	61.2	16	572	6.67	3	3	2	3			3	3	2	3
High	Q96PU5	E3 ubiquitin-protein ligase NEDD4-like OS=Homo sapiens OX=9606 GN=NEDD4L PE=1 SV=2	15	4	3	111.9	4	975	5.82	1	1	1	3	1	2	1	1	1	3	1	2
High	P23458	Tyrosine-protein kinase JAK1 OS=Homo sapiens OX=9606 GN=JAK1 PE=1 SV=2	15	5	5	133.2	6	1154	7.55	3	3	2				3	3	2
High	P68400	Casein kinase II subunit alpha OS=Homo sapiens OX=9606 GN=CSNK2A1 PE=1 SV=1	15	5	5	45.1	21	391	7.74	3	3	3	1		1	3	3	3	1		1
High	O95239	Chromosome-associated kinesin KIF4A OS=Homo sapiens OX=9606 GN=KIF4A PE=1 SV=3	15	7	7	139.8	8	1232	6.27	1		1	1	2	1	1		1	1	2	1
High	P25490	Transcriptional repressor protein YY1 OS=Homo sapiens OX=9606 GN=YY1 PE=1 SV=2	15	3	3	44.7	7	414	6.25		1	2	2	1	2		1	2	2	1	2
High	Q9Y399	28S ribosomal protein S2, mitochondrial OS=Homo sapiens OX=9606 GN=MRPS2 PE=1 SV=1	15	5	5	33.2	14	296	9.26			1	1	3	1			1	1	3	1
High	Q8WVB6	Chromosome transmission fidelity protein 18 homolog OS=Homo sapiens OX=9606 GN=CHTF18 PE=1 SV=1	15	3	3	107.3	4	975	7.21	1	2	1	1	1	1	1	2	1	1	1	1
High	Q9Y618	Nuclear receptor corepressor 2 OS=Homo sapiens OX=9606 GN=NCOR2 PE=1 SV=3	15	8	8	273.5	4	2514	7.59	1		1	1	2	1	1		1	1	2	1
High	Q14558	Phosphoribosyl pyrophosphate synthase-associated protein 1 OS=Homo sapiens OX=9606 GN=PRPSAP1 PE=1 SV=2	15	4	3	39.4	15	356	7.2	3	3	2		1	1	3	3	2		1	1
High	P40222	Alpha-taxilin OS=Homo sapiens OX=9606 GN=TXLNA PE=1 SV=3	15	7	7	61.9	19	546	6.52		2	2	1	3	2		2	2	1	3	2
High	Q9BRU9	rRNA-processing protein UTP23 homolog OS=Homo sapiens OX=9606 GN=UTP23 PE=1 SV=2	15	3	3	28.4	14	249	10.07			1	1	2	2			1	1	2	2
High	P29034	Protein S100-A2 OS=Homo sapiens OX=9606 GN=S100A2 PE=1 SV=3	15	2	2	11.1	19	98	4.78	2	2	2	1	1		2	2	2	1	1
High	P50552	Vasodilator-stimulated phosphoprotein OS=Homo sapiens OX=9606 GN=VASP PE=1 SV=3	15	5	5	39.8	16	380	8.94	3	2	2				3	2	2
High	O00154	Cytosolic acyl coenzyme A thioester hydrolase OS=Homo sapiens OX=9606 GN=ACOT7 PE=1 SV=3	15	4	4	41.8	11	380	8.54	2	3	2		2		2	3	2		2
High	Q9P1Y5	Calmodulin-regulated spectrin-associated protein 3 OS=Homo sapiens OX=9606 GN=CAMSAP3 PE=1 SV=2	15	5	5	134.7	5	1249	8.35	1	1	2	1	1	1	1	1	2	1	1	1
High	Q9H4M9	EH domain-containing protein 1 OS=Homo sapiens OX=9606 GN=EHD1 PE=1 SV=2	15	5	4	60.6	13	534	6.83	2	3	3	1	1	1	2	3	2	1	1	1
High	Q9NVS9	Pyridoxine-5'-phosphate oxidase OS=Homo sapiens OX=9606 GN=PNPO PE=1 SV=1	15	6	6	30	26	261	7.06			1	1	2	2			1	1	2	2
High	Q9Y6G9	Cytoplasmic dynein 1 light intermediate chain 1 OS=Homo sapiens OX=9606 GN=DYNC1LI1 PE=1 SV=3	15	4	4	56.5	8	523	6.42	2	2	2		1		2	2	2		1
High	P53985	Monocarboxylate transporter 1 OS=Homo sapiens OX=9606 GN=SLC16A1 PE=1 SV=3	15	2	2	53.9	6	500	8.66	2	2	2	1	1	1	2	2	1	1	1	1
High	Q9H3P7	Golgi resident protein GCP60 OS=Homo sapiens OX=9606 GN=ACBD3 PE=1 SV=4	15	6	6	60.6	14	528	5.06		1	1		2			1	1		2
High	P78385	SWISS-PROT:P78385 Keratin, type II cuticular Hb3 (Hair keratin, type II Hb3) - Homo sapiens (Human).	14	2	1	54.2	4	493	5.4	2	2	2	1	1	1	1	1	1	1	1	1
High	Q12815	Tastin OS=Homo sapiens OX=9606 GN=TROAP PE=1 SV=3	14	8	8	83.8	13	778	7.36					1						1
High	Q9HAU0	Pleckstrin homology domain-containing family A member 5 OS=Homo sapiens OX=9606 GN=PLEKHA5 PE=1 SV=1	14	5	5	127.4	5	1116	7.53	1	1	2		2		1	1	2		2
High	Q96AE4	Far upstream element-binding protein 1 OS=Homo sapiens OX=9606 GN=FUBP1 PE=1 SV=3	14	4	2	67.5	6	644	7.61	1	2	1		1	2	1	2	1		1	2
High	Q13131	5'-AMP-activated protein kinase catalytic subunit alpha-1 OS=Homo sapiens OX=9606 GN=PRKAA1 PE=1 SV=4	14	5	5	64	11	559	8.12	1	1	1		3	1	1	1	1		3	1
High	Q14517	Protocadherin Fat 1 OS=Homo sapiens OX=9606 GN=FAT1 PE=1 SV=2	14	6	6	506	2	4588	5	2	4	4		2		2	4	4		2
High	P55199	RNA polymerase II elongation factor ELL OS=Homo sapiens OX=9606 GN=ELL PE=1 SV=1	14	5	5	68.2	10	621	9.33				2	3	3				2	3	3
High	Q8N6M0	Deubiquitinase OTUD6B OS=Homo sapiens OX=9606 GN=OTUD6B PE=1 SV=1	14	3	3	33.8	11	293	6.05	1	2	2	2	2	1	1	2	2	2	2	1
High	Q05086	Ubiquitin-protein ligase E3A OS=Homo sapiens OX=9606 GN=UBE3A PE=1 SV=4	14	5	5	100.6	7	875	5.22			3	2	1	2			3	2	1	2
High	Q9NUI1	Peroxisomal 2,4-dienoyl-CoA reductase [(3E)-enoyl-CoA-producing] OS=Homo sapiens OX=9606 GN=DECR2 PE=1 SV=1	14	6	6	30.8	21	292	9.22	1			1	2		1			1	2
High	Q01105	Protein SET OS=Homo sapiens OX=9606 GN=SET PE=1 SV=3	14	3	3	33.5	12	290	4.32			2	3	1	2			2	3	1	2
High	Q4G0N4	NAD kinase 2, mitochondrial OS=Homo sapiens OX=9606 GN=NADK2 PE=1 SV=2	14	6	6	49.4	13	442	8.18				2	1	2				2	1	2
High	Q8NFF5	FAD synthase OS=Homo sapiens OX=9606 GN=FLAD1 PE=1 SV=1	14	8	8	65.2	19	587	6.93	1			2	3	2	1			2	3	2
High	Q8IUC4	Rhophilin-2 OS=Homo sapiens OX=9606 GN=RHPN2 PE=1 SV=1	14	5	5	76.9	11	686	6.8	2	1	2				2	1	2
High	Q86UE8	Serine/threonine-protein kinase tousled-like 2 OS=Homo sapiens OX=9606 GN=TLK2 PE=1 SV=2	14	3	2	87.6	3	772	8.41			1	2	2	1			1	1	1	1
High	P49184	Deoxyribonuclease-1-like 1 OS=Homo sapiens OX=9606 GN=DNASE1L1 PE=1 SV=1	14	3	3	33.9	15	302	5.74	2	2	3				2	2	3
High	P13688	Carcinoembryonic antigen-related cell adhesion molecule 1 OS=Homo sapiens OX=9606 GN=CEACAM1 PE=1 SV=2	14	3	2	57.5	8	526	5.97	2	1	1	1	1	1	2	1	1	1	1	1
High	Q02338	D-beta-hydroxybutyrate dehydrogenase, mitochondrial OS=Homo sapiens OX=9606 GN=BDH1 PE=1 SV=3	14	6	6	38.1	22	343	8.95	1	1					1	1
High	Q6P3X3	Tetratricopeptide repeat protein 27 OS=Homo sapiens OX=9606 GN=TTC27 PE=1 SV=1	14	6	6	96.6	9	843	5.59	4	4	5				4	4	5
High	Q9NS69	Mitochondrial import receptor subunit TOM22 homolog OS=Homo sapiens OX=9606 GN=TOMM22 PE=1 SV=3	14	4	4	15.5	51	142	4.34	3	3	4	1		1	2	2	3	1		1
High	P62312	U6 snRNA-associated Sm-like protein LSm6 OS=Homo sapiens OX=9606 GN=LSM6 PE=1 SV=1	14	2	2	9.1	19	80	9.58	1		1	2	2	2	1		1	2	2	2
High	P35249	Replication factor C subunit 4 OS=Homo sapiens OX=9606 GN=RFC4 PE=1 SV=2	14	7	7	39.7	19	363	8.02			1		2				1		1
High	P49757	Protein numb homolog OS=Homo sapiens OX=9606 GN=NUMB PE=1 SV=2	14	5	5	70.8	9	651	8.51	2	2		1	2	1	2	2		1	2	1
High	Q9BUA3	Spindlin interactor and repressor of chromatin-binding protein OS=Homo sapiens OX=9606 GN=SPINDOC PE=1 SV=3	14	6	6	41	20	381	5.01	4	4	5		1		4	4	5		1
High	P0C7P4	Putative cytochrome b-c1 complex subunit Rieske-like protein 1 OS=Homo sapiens OX=9606 GN=UQCRFS1P1 PE=5 SV=1	14	5	1	30.8	17	283	8.87	2	1	4	2	1	1	2	1	4	2	1	1
High	P23919	Thymidylate kinase OS=Homo sapiens OX=9606 GN=DTYMK PE=1 SV=4	14	4	4	23.8	17	212	8.27		1	2	1		1		1	2	1		1
High	Q8IXI1	Mitochondrial Rho GTPase 2 OS=Homo sapiens OX=9606 GN=RHOT2 PE=1 SV=2	14	6	5	68.1	17	618	5.86	1	1	1	2	3	2	1	1	1	2	3	2
High	Q8IWU2	Serine/threonine-protein kinase LMTK2 OS=Homo sapiens OX=9606 GN=LMTK2 PE=1 SV=2	14	5	5	164.8	5	1503	4.48	1	1	4				1	1	3
High	Q8TDD1	ATP-dependent RNA helicase DDX54 OS=Homo sapiens OX=9606 GN=DDX54 PE=1 SV=2	14	7	6	98.5	10	881	10.02
High	P22059	Oxysterol-binding protein 1 OS=Homo sapiens OX=9606 GN=OSBP PE=1 SV=1	14	4	4	89.4	6	807	7.3	1	1	2		1		1	1	2		1
High	Q92643	GPI-anchor transamidase OS=Homo sapiens OX=9606 GN=PIGK PE=1 SV=2	14	5	5	45.2	16	395	6.16	2	3	3	1	1	1	2	3	3	1	1	1
High	Q8TEQ6	Gem-associated protein 5 OS=Homo sapiens OX=9606 GN=GEMIN5 PE=1 SV=3	14	5	5	168.5	4	1508	6.62		1	1		2			1	1		2
High	Q9NX20	39S ribosomal protein L16, mitochondrial OS=Homo sapiens OX=9606 GN=MRPL16 PE=1 SV=1	14	5	5	28.4	20	251	10.13	3	1	2		1		3	1	2		1
High	Q9BXS6	Nucleolar and spindle-associated protein 1 OS=Homo sapiens OX=9606 GN=NUSAP1 PE=1 SV=1	14	4	4	49.4	13	441	9.91	1	1		1	2	1	1	1		1	2	1
High	P60468	Protein transport protein Sec61 subunit beta OS=Homo sapiens OX=9606 GN=SEC61B PE=1 SV=2	14	2	2	10	22	96	11.56	2	2	1	1	1	1	2	2	1	1	1	1
High	Q8WVJ2	NudC domain-containing protein 2 OS=Homo sapiens OX=9606 GN=NUDCD2 PE=1 SV=1	14	2	2	17.7	13	157	5.07	3	2	2		1	1	2	1	2		1	1
High	Q8NB16	Mixed lineage kinase domain-like protein OS=Homo sapiens OX=9606 GN=MLKL PE=1 SV=1	14	5	5	54.4	14	471	8.82	1	2	1		1		1	2	1		1
High	Q9Y316	Protein MEMO1 OS=Homo sapiens OX=9606 GN=MEMO1 PE=1 SV=1	14	5	5	33.7	18	297	7.14	2	1	2	1		1	2	1	2	1		1
High	Q92530	Proteasome inhibitor PI31 subunit OS=Homo sapiens OX=9606 GN=PSMF1 PE=1 SV=2	14	3	3	29.8	14	271	5.74	1	2	1	1	2	1	1	2	1	1	2	1
High	Q13155	Aminoacyl tRNA synthase complex-interacting multifunctional protein 2 OS=Homo sapiens OX=9606 GN=AIMP2 PE=1 SV=2	14	5	5	35.3	23	320	8.22	1		2	1	1		1		2	1	1
High	Q9BT78	COP9 signalosome complex subunit 4 OS=Homo sapiens OX=9606 GN=COPS4 PE=1 SV=1	14	6	6	46.2	18	406	5.83	2		2	1		2	2		2	1		2
High	P62861	FAU ubiquitin-like and ribosomal protein S30 OS=Homo sapiens OX=9606 GN=FAU PE=1 SV=2	14	2	2	14.4	8	133	10.17	1	1	2	1	1	1	1	1	1	1	1	1
High	Q02241	Kinesin-like protein KIF23 OS=Homo sapiens OX=9606 GN=KIF23 PE=1 SV=3	14	5	5	110	7	960	8.51	2	3	2				2	3	2
High	Q14004	Cyclin-dependent kinase 13 OS=Homo sapiens OX=9606 GN=CDK13 PE=1 SV=2	14	2	1	164.8	1	1512	9.69	1	2	2	2	2	1	1	1	1	1	1	1
High	Q9BQ39	ATP-dependent RNA helicase DDX50 OS=Homo sapiens OX=9606 GN=DDX50 PE=1 SV=1	14	4	2	82.5	6	737	9.17				1	4	1				1	3	1
High	Q9NZI7	Upstream-binding protein 1 OS=Homo sapiens OX=9606 GN=UBP1 PE=1 SV=1	14	5	4	60.5	13	540	6.35	4	3	4				4	3	4
High	Q9BWE0	Replication initiator 1 OS=Homo sapiens OX=9606 GN=REPIN1 PE=1 SV=1	14	3	3	63.5	8	567	9.98				1		2				1		2
High	Q8WV41	Sorting nexin-33 OS=Homo sapiens OX=9606 GN=SNX33 PE=1 SV=1	14	4	4	65.2	9	574	6.79			2	2	1	2			2	2	1	2
High	Q9UID6	Zinc finger protein 639 OS=Homo sapiens OX=9606 GN=ZNF639 PE=1 SV=1	14	7	7	56	17	485	5.57				2	2	2				2	2	2
High	Q12830	Nucleosome-remodeling factor subunit BPTF OS=Homo sapiens OX=9606 GN=BPTF PE=1 SV=3	14	7	7	338.1	2	3046	6.54				2	4	3				2	4	3
High	Q02790	Peptidyl-prolyl cis-trans isomerase FKBP4 OS=Homo sapiens OX=9606 GN=FKBP4 PE=1 SV=3	14	5	5	51.8	9	459	5.43	2	3	3	1			2	3	3	1
High	Q5TFE4	5'-nucleotidase domain-containing protein 1 OS=Homo sapiens OX=9606 GN=NT5DC1 PE=1 SV=1	14	3	3	51.8	8	455	6.35	1	1	1	1	3	1	1	1	1	1	3	1
High	Q16875	6-phosphofructo-2-kinase/fructose-2,6-bisphosphatase 3 OS=Homo sapiens OX=9606 GN=PFKFB3 PE=1 SV=1	14	7	5	59.6	16	520	8.21			1	1	1				1	1	1
High	Q9NYV4	Cyclin-dependent kinase 12 OS=Homo sapiens OX=9606 GN=CDK12 PE=1 SV=2	14	2	1	164.1	1	1490	9.44	1	2	2	2	2	1	1	1	1	1	1	1
High	P06400	Retinoblastoma-associated protein OS=Homo sapiens OX=9606 GN=RB1 PE=1 SV=2	14	5	5	106.1	6	928	7.94	2	3		1	2		2	3		1	2
High	Q9P016	Thymocyte nuclear protein 1 OS=Homo sapiens OX=9606 GN=THYN1 PE=1 SV=1	14	4	4	25.7	16	225	9.25	1	1	2	1	2	1	1	1	2	1	2	1
High	Q14152	Eukaryotic translation initiation factor 3 subunit A OS=Homo sapiens OX=9606 GN=EIF3A PE=1 SV=1	14	5	5	166.5	4	1382	6.79	1		2	2	2	1	1		2	2	2	1
High	Q9HB21	Pleckstrin homology domain-containing family A member 1 OS=Homo sapiens OX=9606 GN=PLEKHA1 PE=1 SV=2	14	4	4	45.5	13	404	8.56	2	2	1				2	2	1
High	Q9BWM7	Sideroflexin-3 OS=Homo sapiens OX=9606 GN=SFXN3 PE=1 SV=3	14	3	3	35.5	10	321	9.1	2	2	3	1		1	2	2	3	1		1
High	Q9Y3B4	Splicing factor 3B subunit 6 OS=Homo sapiens OX=9606 GN=SF3B6 PE=1 SV=1	14	4	4	14.6	38	125	9.38	1	1	1	1	2	1	1	1	1	1	2	1
High	P49750	YLP motif-containing protein 1 OS=Homo sapiens OX=9606 GN=YLPM1 PE=1 SV=4	14	5	5	241.5	4	2146	6.55	3	3	2	1			3	3	2	1
High	P52434	DNA-directed RNA polymerases I, II, and III subunit RPABC3 OS=Homo sapiens OX=9606 GN=POLR2H PE=1 SV=4	14	3	3	17.1	27	150	4.68		1	1	1	2	2		1	1	1	2	2
High	Q96JP5	E3 ubiquitin-protein ligase ZFP91 OS=Homo sapiens OX=9606 GN=ZFP91 PE=1 SV=1	14	4	4	63.4	10	570	7.36				1		1				1		1
High	Q9P1Z2	Calcium-binding and coiled-coil domain-containing protein 1 OS=Homo sapiens OX=9606 GN=CALCOCO1 PE=1 SV=2	14	4	4	77.3	6	691	4.82	1		2	1	1	1	1		2	1	1	1
High	O60307	Microtubule-associated serine/threonine-protein kinase 3 OS=Homo sapiens OX=9606 GN=MAST3 PE=1 SV=2	14	2	1	143	1	1309	8.06			1	2	3	1			1	1	2	1
High	Q9HCD5	Nuclear receptor coactivator 5 OS=Homo sapiens OX=9606 GN=NCOA5 PE=1 SV=2	14	6	6	65.5	11	579	9.6	4	4	2	1	2	1	4	4	2	1	2	1
High	Q6Y7W6	GRB10-interacting GYF protein 2 OS=Homo sapiens OX=9606 GN=GIGYF2 PE=1 SV=1	14	5	5	150	6	1299	5.54	1	1	2				1	1	2
High	Q53EP0	Fibronectin type III domain-containing protein 3B OS=Homo sapiens OX=9606 GN=FNDC3B PE=1 SV=2	13	4	4	132.8	4	1204	5.95	1	1	2		2		1	1	2		2
High	Q96FV9	THO complex subunit 1 OS=Homo sapiens OX=9606 GN=THOC1 PE=1 SV=1	13	5	5	75.6	9	657	4.98				2	1	2				2	1	2
High	Q9Y6D5	Brefeldin A-inhibited guanine nucleotide-exchange protein 2 OS=Homo sapiens OX=9606 GN=ARFGEF2 PE=1 SV=3	13	5	4	201.9	3	1785	6.33	1	1	3				1	1	3
High	P31944	Caspase-14 OS=Homo sapiens OX=9606 GN=CASP14 PE=1 SV=2	13	6	6	27.7	28	242	5.58				4	5	4				4	5	4
High	O43824	Putative GTP-binding protein 6 OS=Homo sapiens OX=9606 GN=GTPBP6 PE=1 SV=4	13	4	4	56.9	7	516	9.42	1	2		1	1	1	1	2		1	1	1
High	P28838	Cytosol aminopeptidase OS=Homo sapiens OX=9606 GN=LAP3 PE=1 SV=3	13	4	4	56.1	11	519	7.93	2	3		1	1		2	3		1	1
High	P23497	Nuclear autoantigen Sp-100 OS=Homo sapiens OX=9606 GN=SP100 PE=1 SV=3	13	5	5	100.4	8	879	8.22				1	2	3				1	2	3
High	Q96I15	Selenocysteine lyase OS=Homo sapiens OX=9606 GN=SCLY PE=1 SV=4	13	5	5	48.1	18	445	7.12	1		2			1	1		2			1
High	P30085	UMP-CMP kinase OS=Homo sapiens OX=9606 GN=CMPK1 PE=1 SV=3	13	5	5	22.2	22	196	5.57			1			1			1			1
High	Q9H0H5	Rac GTPase-activating protein 1 OS=Homo sapiens OX=9606 GN=RACGAP1 PE=1 SV=1	13	3	3	71	5	632	8.88	2	2	3		1	1	2	2	3		1	1
High	Q9Y2L1	Exosome complex exonuclease RRP44 OS=Homo sapiens OX=9606 GN=DIS3 PE=1 SV=2	13	5	5	108.9	9	958	7.14	1	1	1				1	1	1
High	Q10589	Bone marrow stromal antigen 2 OS=Homo sapiens OX=9606 GN=BST2 PE=1 SV=1	13	2	2	19.8	13	180	5.6	2	1	1	1	2	1	1	1	1	1	1	1
High	Q5VT25	Serine/threonine-protein kinase MRCK alpha OS=Homo sapiens OX=9606 GN=CDC42BPA PE=1 SV=1	13	7	3	197.2	5	1732	6.58			1						1
High	Q15007	Pre-mRNA-splicing regulator WTAP OS=Homo sapiens OX=9606 GN=WTAP PE=1 SV=2	13	5	5	44.2	17	396	5.19		1	1	3	2	2		1	1	3	2	2
High	O95394	Phosphoacetylglucosamine mutase OS=Homo sapiens OX=9606 GN=PGM3 PE=1 SV=1	13	5	5	59.8	8	542	6.25	1	2		2	1		1	2		2	1
High	P12829	Myosin light chain 4 OS=Homo sapiens OX=9606 GN=MYL4 PE=1 SV=3	13	5	4	21.6	24	197	5.03	1	1	1	5		4	1	1	1	5		4
High	Q9NP72	Ras-related protein Rab-18 OS=Homo sapiens OX=9606 GN=RAB18 PE=1 SV=1	13	5	5	23	30	206	5.24	1	1	1	1		2	1	1	1	1		2
High	Q96RT1	Erbin OS=Homo sapiens OX=9606 GN=ERBIN PE=1 SV=2	13	6	6	158.2	6	1412	5.5	2	3	4		1		2	3	4		1
High	O75164	Lysine-specific demethylase 4A OS=Homo sapiens OX=9606 GN=KDM4A PE=1 SV=2	13	8	8	120.6	8	1064	5.85					3	2					3	2
High	P51665	26S proteasome non-ATPase regulatory subunit 7 OS=Homo sapiens OX=9606 GN=PSMD7 PE=1 SV=2	13	3	3	37	10	324	6.77			1	2	2	2			1	2	2	2
High	Q96EY5	Multivesicular body subunit 12A OS=Homo sapiens OX=9606 GN=MVB12A PE=1 SV=1	13	4	4	28.8	26	273	8.91	1	1	2	1			1	1	2	1
High	P63218	Guanine nucleotide-binding protein G(I)/G(S)/G(O) subunit gamma-5 OS=Homo sapiens OX=9606 GN=GNG5 PE=1 SV=3	13	2	2	7.3	24	68	9.85	1	1	2	2	1	1	1	1	2	2	1	1
High	P00533	Epidermal growth factor receptor OS=Homo sapiens OX=9606 GN=EGFR PE=1 SV=2	13	4	3	134.2	6	1210	6.68	2	3	2				2	3	2
High	P14550	Aldo-keto reductase family 1 member A1 OS=Homo sapiens OX=9606 GN=AKR1A1 PE=1 SV=3	13	2	2	36.6	5	325	6.79	1	1	2	2	2	2	1	1	2	2	2	2
High	O15067	Phosphoribosylformylglycinamidine synthase OS=Homo sapiens OX=9606 GN=PFAS PE=1 SV=4	13	8	8	144.6	7	1338	5.76		1	1		3	1		1	1		3	1
High	Q5RKV6	Exosome complex component MTR3 OS=Homo sapiens OX=9606 GN=EXOSC6 PE=1 SV=1	13	4	4	28.2	16	272	6.28		1	1	2	2	1		1	1	2	2	1
High	Q9BUQ8	Probable ATP-dependent RNA helicase DDX23 OS=Homo sapiens OX=9606 GN=DDX23 PE=1 SV=3	13	4	4	95.5	4	820	9.55		1		1	1	2		1		1	1	1
High	Q6DKI2	Galectin-9C OS=Homo sapiens OX=9606 GN=LGALS9C PE=1 SV=2	13	4	1	39.6	13	356	9.19	1		1	1	2	2	1		1	1	2	2
High	Q9BVL2	Nucleoporin p58/p45 OS=Homo sapiens OX=9606 GN=NUP58 PE=1 SV=1	13	5	5	60.9	9	599	9.33		1		1		1		1		1		1
High	O15511	Actin-related protein 2/3 complex subunit 5 OS=Homo sapiens OX=9606 GN=ARPC5 PE=1 SV=3	13	4	3	16.3	34	151	5.67	2	1	2		1		2	1	2		1
High	P61224	Ras-related protein Rap-1b OS=Homo sapiens OX=9606 GN=RAP1B PE=1 SV=1	13	3	1	20.8	21	184	5.78	2		1	1	2	1	2		1	1	2	1
High	Q9HBH1	Peptide deformylase, mitochondrial OS=Homo sapiens OX=9606 GN=PDF PE=1 SV=1	13	4	4	27	20	243	9.16	1	1	1				1	1	1
High	Q8WYP5	Protein ELYS OS=Homo sapiens OX=9606 GN=AHCTF1 PE=1 SV=3	13	5	5	252.3	3	2266	6.6			1	1	1				1	1	1
High	P02675	Fibrinogen beta chain OS=Homo sapiens OX=9606 GN=FGB PE=1 SV=2	13	6	3	55.9	12	491	8.27				4	4	5				4	4	5
High	P78312	Protein FAM193A OS=Homo sapiens OX=9606 GN=FAM193A PE=1 SV=2	13	6	6	139.9	6	1265	6.48				4	4	4				3	4	4
High	O96017	Serine/threonine-protein kinase Chk2 OS=Homo sapiens OX=9606 GN=CHEK2 PE=1 SV=1	13	5	4	60.9	9	543	5.91	1	1	1	1	3		1	1	1	1	3
High	Q86YT6	E3 ubiquitin-protein ligase MIB1 OS=Homo sapiens OX=9606 GN=MIB1 PE=1 SV=1	13	4	4	110.1	4	1006	6.92	2	1	2		1		2	1	2		1
High	P17676	CCAAT/enhancer-binding protein beta OS=Homo sapiens OX=9606 GN=CEBPB PE=1 SV=2	13	4	4	36.1	17	345	8.31	2	2	2		1	2	2	2	2		1	2
High	O43663	Protein regulator of cytokinesis 1 OS=Homo sapiens OX=9606 GN=PRC1 PE=1 SV=2	13	3	3	71.6	6	620	6.68			1	1	2	1			1	1	2	1
High	O14735	CDP-diacylglycerol--inositol 3-phosphatidyltransferase OS=Homo sapiens OX=9606 GN=CDIPT PE=1 SV=1	13	2	2	23.5	10	213	8.03	2	1	1	2	1		2	1	1	2	1
High	Q16762	Thiosulfate sulfurtransferase OS=Homo sapiens OX=9606 GN=TST PE=1 SV=4	13	6	6	33.4	33	297	7.25	2	3	1				2	3	1
High	P05198	Eukaryotic translation initiation factor 2 subunit 1 OS=Homo sapiens OX=9606 GN=EIF2S1 PE=1 SV=3	13	6	6	36.1	21	315	5.08	1	2	1	2	1	1	1	2	1	2	1	1
High	O75909	Cyclin-K OS=Homo sapiens OX=9606 GN=CCNK PE=1 SV=2	13	4	4	64.2	11	580	8.41				2	2	1				2	2	1
High	Q6IAA8	Ragulator complex protein LAMTOR1 OS=Homo sapiens OX=9606 GN=LAMTOR1 PE=1 SV=2	13	2	2	17.7	15	161	5.15	2	1	2		1		2	1	2		1
High	P55735	Protein SEC13 homolog OS=Homo sapiens OX=9606 GN=SEC13 PE=1 SV=3	13	3	3	35.5	15	322	5.48	1			1	1		1			1	1
High	Q16769	Glutaminyl-peptide cyclotransferase OS=Homo sapiens OX=9606 GN=QPCT PE=1 SV=1	13	3	3	40.9	12	361	6.61	1	1	1	1	2	2	1	1	1	1	2	2
High	O95218	Zinc finger Ran-binding domain-containing protein 2 OS=Homo sapiens OX=9606 GN=ZRANB2 PE=1 SV=2	13	6	6	37.4	24	330	10.01		1	1		2			1	1		2
High	P13804	Electron transfer flavoprotein subunit alpha, mitochondrial OS=Homo sapiens OX=9606 GN=ETFA PE=1 SV=1	13	6	6	35.1	26	333	8.38	3	4	3				3	4	3
High	O43772	Mitochondrial carnitine/acylcarnitine carrier protein OS=Homo sapiens OX=9606 GN=SLC25A20 PE=1 SV=1	13	5	5	32.9	19	301	9.41	2	1	4				2	1	4
High	P41229	Lysine-specific demethylase 5C OS=Homo sapiens OX=9606 GN=KDM5C PE=1 SV=2	13	7	6	175.6	6	1560	5.58	1	1	2		1		1	1	2		1
High	Q9UQ80	Proliferation-associated protein 2G4 OS=Homo sapiens OX=9606 GN=PA2G4 PE=1 SV=3	13	4	4	43.8	18	394	6.55	1	1	1		3		1	1	1		2
High	Q9P1U1	Actin-related protein 3B OS=Homo sapiens OX=9606 GN=ACTR3B PE=2 SV=1	13	3	1	47.6	10	418	5.88	2	2	1	1	1	2	2	2	1	1	1	2
High	P18283	Glutathione peroxidase 2 OS=Homo sapiens OX=9606 GN=GPX2 PE=1 SV=3	13	5	5	21.9	33	190	7.78			3	1	2				3	1	2
High	Q14344	Guanine nucleotide-binding protein subunit alpha-13 OS=Homo sapiens OX=9606 GN=GNA13 PE=1 SV=2	13	3	1	44	8	377	8	1	2	1	2	1	2	1	2	1	2	1	2
High	Q86X76	Deaminated glutathione amidase OS=Homo sapiens OX=9606 GN=NIT1 PE=1 SV=2	13	4	4	35.9	15	327	7.74	1		2		1		1		2		1
High	Q9UJC5	SH3 domain-binding glutamic acid-rich-like protein 2 OS=Homo sapiens OX=9606 GN=SH3BGRL2 PE=1 SV=2	13	3	3	12.3	36	107	6.71	1	2	3	1	1	1	1	2	3	1	1	1
High	Q14692	Ribosome biogenesis protein BMS1 homolog OS=Homo sapiens OX=9606 GN=BMS1 PE=1 SV=1	13	6	6	145.7	6	1282	6.44					2						2
High	P09110	3-ketoacyl-CoA thiolase, peroxisomal OS=Homo sapiens OX=9606 GN=ACAA1 PE=1 SV=2	13	7	7	44.3	30	424	8.44		2	1		2			2	1		2
High	Q9Y3A4	Ribosomal RNA-processing protein 7 homolog A OS=Homo sapiens OX=9606 GN=RRP7A PE=1 SV=2	13	4	4	32.3	23	280	9.58	1	1			1	2	1	1			1	2
High	P39748	Flap endonuclease 1 OS=Homo sapiens OX=9606 GN=FEN1 PE=1 SV=1	13	2	2	42.6	8	380	8.62	2	2	2	1	1	1	2	2	2	1	1	1
High	Q96BS2	Calcineurin B homologous protein 3 OS=Homo sapiens OX=9606 GN=TESC PE=1 SV=3	13	4	4	24.7	21	214	4.93	3	3	2	1		1	3	3	2	1		1
High	O15031	Plexin-B2 OS=Homo sapiens OX=9606 GN=PLXNB2 PE=1 SV=3	13	5	5	205	4	1838	6.24	2	2	2				2	2	2
High	Q96J01	THO complex subunit 3 OS=Homo sapiens OX=9606 GN=THOC3 PE=1 SV=1	13	3	3	38.7	9	351	6.09		1	2	1	1	1		1	2	1	1	1
High	Q6P179	Endoplasmic reticulum aminopeptidase 2 OS=Homo sapiens OX=9606 GN=ERAP2 PE=1 SV=2	13	7	7	110.4	8	960	6.71	4	1	4			1	4	1	4			1
High	Q9Y3D3	28S ribosomal protein S16, mitochondrial OS=Homo sapiens OX=9606 GN=MRPS16 PE=1 SV=1	13	3	3	15.3	25	137	9.5				2	3	2				2	3	2
High	Q6ISB3	Grainyhead-like protein 2 homolog OS=Homo sapiens OX=9606 GN=GRHL2 PE=1 SV=1	13	5	5	71.1	12	625	6.44	1	1	3	1	1	1	1	1	3	1	1	1
High	Q9BSD7	Cancer-related nucleoside-triphosphatase OS=Homo sapiens OX=9606 GN=NTPCR PE=1 SV=1	13	2	2	20.7	13	190	9.54	1		2	2	1	1	1		2	1	1	1
High	Q8TE77	Protein phosphatase Slingshot homolog 3 OS=Homo sapiens OX=9606 GN=SSH3 PE=1 SV=2	13	4	4	73	6	659	5.3			3	1		1			2	1		1
High	Q9C0F0	Putative Polycomb group protein ASXL3 OS=Homo sapiens OX=9606 GN=ASXL3 PE=2 SV=3	13	3	1	241.8	1	2248	6.14				2	2	2				2	2	2
High	Q8N983	39S ribosomal protein L43, mitochondrial OS=Homo sapiens OX=9606 GN=MRPL43 PE=1 SV=1	13	4	4	23.4	17	215	8.65		1			2	1		1			2	1
High	O14647	Chromodomain-helicase-DNA-binding protein 2 OS=Homo sapiens OX=9606 GN=CHD2 PE=1 SV=2	12	5	4	211.2	3	1828	8.1	4	3	4		1		4	3	4		1
High	P20020	Plasma membrane calcium-transporting ATPase 1 OS=Homo sapiens OX=9606 GN=ATP2B1 PE=1 SV=4	12	6	6	134.6	7	1220	5.91	2	2	2		1		2	2	2		1
High	Q13232	Nucleoside diphosphate kinase 3 OS=Homo sapiens OX=9606 GN=NME3 PE=1 SV=2	12	4	4	19	28	169	7.84	2	2		1	1	1	2	2		1	1	1
High	O75940	Survival of motor neuron-related-splicing factor 30 OS=Homo sapiens OX=9606 GN=SMNDC1 PE=1 SV=1	12	3	3	26.7	18	238	7.24				1	2	2				1	2	2
High	Q9H6R4	Nucleolar protein 6 OS=Homo sapiens OX=9606 GN=NOL6 PE=1 SV=2	12	4	4	127.5	5	1146	7.64			1		1	2			1		1	2
High	P10155	RNA-binding protein RO60 OS=Homo sapiens OX=9606 GN=RO60 PE=1 SV=2	12	3	3	60.6	5	538	8.03	1	1	2	1	1	1	1	1	2	1	1	1
High	P21281	V-type proton ATPase subunit B, brain isoform OS=Homo sapiens OX=9606 GN=ATP6V1B2 PE=1 SV=3	12	2	2	56.5	6	511	5.81	2	2	1	1	1	1	2	2	1	1	1	1
High	P02754	SWISS-PROT:P02754 Beta-lactoglobulin - Bos taurus (Bovine).	12	5	5	18.3	31	162	4.92				1	1	1				1	1	1
High	P11498	Pyruvate carboxylase, mitochondrial OS=Homo sapiens OX=9606 GN=PC PE=1 SV=2	12	5	5	129.6	6	1178	6.84	1	2		1		1	1	2		1		1
High	Q8N1B4	Vacuolar protein sorting-associated protein 52 homolog OS=Homo sapiens OX=9606 GN=VPS52 PE=1 SV=1	12	5	5	82.2	7	723	5.99	4	2	5				3	2	5
High	O95819	Mitogen-activated protein kinase kinase kinase kinase 4 OS=Homo sapiens OX=9606 GN=MAP4K4 PE=1 SV=2	12	5	5	142	5	1239	7.46	1		3	1	2	1	1		3	1	2	1
High	Q99436	Proteasome subunit beta type-7 OS=Homo sapiens OX=9606 GN=PSMB7 PE=1 SV=1	12	3	3	29.9	10	277	7.68				3	3	2				3	3	2
High	Q16698	2,4-dienoyl-CoA reductase [(3E)-enoyl-CoA-producing], mitochondrial OS=Homo sapiens OX=9606 GN=DECR1 PE=1 SV=1	12	3	3	36	14	335	9.28	1	2	2	1	1	1	1	2	2	1	1	1
High	P62491	Ras-related protein Rab-11A OS=Homo sapiens OX=9606 GN=RAB11A PE=1 SV=3	12	3	2	24.4	14	216	6.57	1	1	1	1	1	2	1	1	1	1	1	2
High	Q14739	Delta(14)-sterol reductase LBR OS=Homo sapiens OX=9606 GN=LBR PE=1 SV=2	12	4	4	70.7	7	615	9.36	3	3	2	1	1	1	3	3	2	1	1	1
High	Q92673	Sortilin-related receptor OS=Homo sapiens OX=9606 GN=SORL1 PE=1 SV=2	12	6	6	248.3	3	2214	5.55			1						1
High	Q53GT1	Kelch-like protein 22 OS=Homo sapiens OX=9606 GN=KLHL22 PE=1 SV=2	12	8	8	71.6	12	634	5.49				2	7	3				2	7	3
High	O43488	Aflatoxin B1 aldehyde reductase member 2 OS=Homo sapiens OX=9606 GN=AKR7A2 PE=1 SV=3	12	4	3	39.6	14	359	7.17		1	2	1		2		1	2	1		2
High	P55209	Nucleosome assembly protein 1-like 1 OS=Homo sapiens OX=9606 GN=NAP1L1 PE=1 SV=1	12	4	3	45.3	14	391	4.46	1	3	2	1			1	3	2	1
High	O75175	CCR4-NOT transcription complex subunit 3 OS=Homo sapiens OX=9606 GN=CNOT3 PE=1 SV=1	12	3	3	81.8	9	753	6.2	1	2	1	1	1	1	1	2	1	1	1	1
High	Q969G3	SWI/SNF-related matrix-associated actin-dependent regulator of chromatin subfamily E member 1 OS=Homo sapiens OX=9606 GN=SMARCE1 PE=1 SV=2	12	5	5	46.6	15	411	4.88	1			1			1			1
High	Q8N122	Regulatory-associated protein of mTOR OS=Homo sapiens OX=9606 GN=RPTOR PE=1 SV=1	12	5	5	148.9	5	1335	6.89	2	3	4				2	3	4
High	P51398	28S ribosomal protein S29, mitochondrial OS=Homo sapiens OX=9606 GN=DAP3 PE=1 SV=1	12	7	7	45.5	22	398	8.88					1	1					1	1
High	O15484	Calpain-5 OS=Homo sapiens OX=9606 GN=CAPN5 PE=1 SV=2	12	3	3	73.1	7	640	7.64	1	1	3				1	1	2
High	Q9HAW8	UDP-glucuronosyltransferase 1A10 OS=Homo sapiens OX=9606 GN=UGT1A10 PE=1 SV=1	12	4	4	59.8	8	530	7.3	3	3	2				3	3	2
High	Q9Y657	Spindlin-1 OS=Homo sapiens OX=9606 GN=SPIN1 PE=1 SV=3	12	4	4	29.6	26	262	6.96	3	4	2	1		1	3	4	2	1		1
High	O00560	Syntenin-1 OS=Homo sapiens OX=9606 GN=SDCBP PE=1 SV=1	12	3	3	32.4	22	298	7.53	2	2	2		1		2	2	2		1
High	Q9BRP1	Programmed cell death protein 2-like OS=Homo sapiens OX=9606 GN=PDCD2L PE=1 SV=1	12	4	4	39.4	19	358	4.86			1		1	1			1		1	1
High	Q9BYM8	RanBP-type and C3HC4-type zinc finger-containing protein 1 OS=Homo sapiens OX=9606 GN=RBCK1 PE=1 SV=2	12	4	4	57.5	7	510	5.67			2		2	1			2		2	1
High	Q16563	Synaptophysin-like protein 1 OS=Homo sapiens OX=9606 GN=SYPL1 PE=1 SV=1	12	3	3	28.5	20	259	8.43	2	2	4	1		1	2	2	3	1		1
High	Q96LR5	Ubiquitin-conjugating enzyme E2 E2 OS=Homo sapiens OX=9606 GN=UBE2E2 PE=1 SV=1	12	3	3	22.2	17	201	7.71	2	1	1	2	2	2	2	1	1	2	2	2
High	Q9ULD2	Microtubule-associated tumor suppressor 1 OS=Homo sapiens OX=9606 GN=MTUS1 PE=1 SV=2	12	3	3	141.3	3	1270	7.5	1	2	1		1		1	2	1		1
High	O75396	Vesicle-trafficking protein SEC22b OS=Homo sapiens OX=9606 GN=SEC22B PE=1 SV=5	12	3	3	24.7	16	215	8.51	1			1	1	1	1			1	1	1
High	P78346	Ribonuclease P protein subunit p30 OS=Homo sapiens OX=9606 GN=RPP30 PE=1 SV=1	12	3	3	29.3	15	268	8.91	2	1		2	1	2	2	1		2	1	2
High	Q8WWC4	m-AAA protease-interacting protein 1, mitochondrial OS=Homo sapiens OX=9606 GN=MAIP1 PE=1 SV=1	12	5	5	32.5	19	291	9.17	2	1	5				2	1	5
High	Q9P013	Spliceosome-associated protein CWC15 homolog OS=Homo sapiens OX=9606 GN=CWC15 PE=1 SV=2	12	3	3	26.6	19	229	5.71	1	2	2		2	1	1	2	2		2	1
High	P84095	Rho-related GTP-binding protein RhoG OS=Homo sapiens OX=9606 GN=RHOG PE=1 SV=1	12	3	2	21.3	23	191	8.12	1	2	1	1	1	1	1	1	1	1	1	1
High	Q8N9U0	Tandem C2 domains nuclear protein OS=Homo sapiens OX=9606 GN=TC2N PE=1 SV=2	12	3	3	55.2	7	490	9.19	1	1			2	1	1	1			2	1
High	P84090	Enhancer of rudimentary homolog OS=Homo sapiens OX=9606 GN=ERH PE=1 SV=1	12	2	2	12.3	27	104	5.92	1	1	1	1	2	1	1	1	1	1	1	1
High	Q9ULX9	Transcription factor MafF OS=Homo sapiens OX=9606 GN=MAFF PE=1 SV=2	12	3	3	17.7	29	164	9.8	1	1	1	2	1	1	1	1	1	2	1	1
High	Q9NYK5	39S ribosomal protein L39, mitochondrial OS=Homo sapiens OX=9606 GN=MRPL39 PE=1 SV=3	12	4	4	38.7	12	338	7.65					2	1					2	1
High	Q8WUA4	General transcription factor 3C polypeptide 2 OS=Homo sapiens OX=9606 GN=GTF3C2 PE=1 SV=2	12	6	6	100.6	8	911	7.31					2	1					2	1
High	Q86U90	YrdC domain-containing protein, mitochondrial OS=Homo sapiens OX=9606 GN=YRDC PE=1 SV=1	12	4	4	29.3	23	279	8.57				1	1	1				1	1	1
High	P08123	Collagen alpha-2(I) chain OS=Homo sapiens OX=9606 GN=COL1A2 PE=1 SV=7	12	2	2	129.2	1	1366	8.95				5	3	4				2	2	1
High	P02679	Fibrinogen gamma chain OS=Homo sapiens OX=9606 GN=FGG PE=1 SV=3	12	3	3	51.5	8	453	5.62				4	4	4				3	3	3
High	P45984	Mitogen-activated protein kinase 9 OS=Homo sapiens OX=9606 GN=MAPK9 PE=1 SV=2	12	2	1	48.1	4	424	5.63		1	1	2		2		1	1	2		2
High	Q9Y2L9	Leucine-rich repeat and calponin homology domain-containing protein 1 OS=Homo sapiens OX=9606 GN=LRCH1 PE=1 SV=3	12	4	4	80.8	10	728	5.94	2	2	3				2	2	3
High	Q16181	Septin-7 OS=Homo sapiens OX=9606 GN=SEPTIN7 PE=1 SV=2	12	4	3	50.6	13	437	8.63	2	2	2	2		1	2	2	2	2		1
High	Q9UQN3	Charged multivesicular body protein 2b OS=Homo sapiens OX=9606 GN=CHMP2B PE=1 SV=1	12	3	2	23.9	13	213	8.76	1	1	1				1	1	1
High	P62306	Small nuclear ribonucleoprotein F OS=Homo sapiens OX=9606 GN=SNRPF PE=1 SV=1	12	2	2	9.7	24	86	4.67	1	1	1	2	2	1	1	1	1	2	2	1
High	Q9Y6C9	Mitochondrial carrier homolog 2 OS=Homo sapiens OX=9606 GN=MTCH2 PE=1 SV=1	12	5	5	33.3	16	303	7.97	1		1				1		1
High	Q8WY36	HMG box transcription factor BBX OS=Homo sapiens OX=9606 GN=BBX PE=1 SV=1	12	6	6	105.1	9	941	8.79		1	1		2	1		1	1		2	1
High	Q9NUP9	Protein lin-7 homolog C OS=Homo sapiens OX=9606 GN=LIN7C PE=1 SV=1	12	5	5	21.8	25	197	8.43	1	1	1	2	1	1	1	1	1	2	1	1
High	Q08379	Golgin subfamily A member 2 OS=Homo sapiens OX=9606 GN=GOLGA2 PE=1 SV=3	12	4	4	113	6	1002	5.02	1			1	2		1			1	2
High	Q13616	Cullin-1 OS=Homo sapiens OX=9606 GN=CUL1 PE=1 SV=2	12	4	4	89.6	6	776	8	1		1	1	1	1	1		1	1	1	1
High	Q15397	Pumilio homolog 3 OS=Homo sapiens OX=9606 GN=PUM3 PE=1 SV=3	12	4	4	73.5	5	648	9.64				2	3					2	3
High	P10321	HLA class I histocompatibility antigen, C alpha chain OS=Homo sapiens OX=9606 GN=HLA-C PE=1 SV=3	12	3	2	40.6	12	366	6.04				1	1	2				1	1	2
High	Q96P70	Importin-9 OS=Homo sapiens OX=9606 GN=IPO9 PE=1 SV=3	12	5	5	115.9	6	1041	4.81	4	1	4				4	1	4
High	Q9UPN7	Serine/threonine-protein phosphatase 6 regulatory subunit 1 OS=Homo sapiens OX=9606 GN=PPP6R1 PE=1 SV=5	12	4	4	96.7	8	881	4.55			3	1		1			3	1		1
High	O75607	Nucleoplasmin-3 OS=Homo sapiens OX=9606 GN=NPM3 PE=1 SV=3	12	3	3	19.3	26	178	4.63	1	1	1				1	1	1
High	Q9Y3B9	RRP15-like protein OS=Homo sapiens OX=9606 GN=RRP15 PE=1 SV=2	12	4	4	31.5	15	282	5.52		1	1					1	1
High	P29992	Guanine nucleotide-binding protein subunit alpha-11 OS=Homo sapiens OX=9606 GN=GNA11 PE=1 SV=2	12	4	1	42.1	9	359	5.69		1	1	3	2	2		1	1	3	2	2
High	Q8TB45	DEP domain-containing mTOR-interacting protein OS=Homo sapiens OX=9606 GN=DEPTOR PE=1 SV=2	12	6	6	46.3	19	409	8.07	1						1
High	O15084	Serine/threonine-protein phosphatase 6 regulatory ankyrin repeat subunit A OS=Homo sapiens OX=9606 GN=ANKRD28 PE=1 SV=5	12	2	2	112.9	2	1053	6.25	1	1	2		3		1	1	2		2
High	Q15124	Phosphoglucomutase-like protein 5 OS=Homo sapiens OX=9606 GN=PGM5 PE=1 SV=2	12	2	2	62.2	4	567	7.21	1	1	2	1	1	1	1	1	1	1	1	1
High	Q15293	Reticulocalbin-1 OS=Homo sapiens OX=9606 GN=RCN1 PE=1 SV=1	12	5	5	38.9	18	331	5	3	4	2				3	4	2
High	O95881	Thioredoxin domain-containing protein 12 OS=Homo sapiens OX=9606 GN=TXNDC12 PE=1 SV=1	11	3	3	19.2	18	172	5.4			1	2	3	1			1	2	3	1
High	Q9BYG5	Partitioning defective 6 homolog beta OS=Homo sapiens OX=9606 GN=PARD6B PE=1 SV=1	11	2	2	41.2	6	372	5.58	1	1	2	1	1	1	1	1	1	1	1	1
High	P53597	Succinate--CoA ligase [ADP/GDP-forming] subunit alpha, mitochondrial OS=Homo sapiens OX=9606 GN=SUCLG1 PE=1 SV=4	11	2	2	36.2	7	346	8.79	1	1	1	2	1	2	1	1	1	2	1	2
High	Q8ND24	RING finger protein 214 OS=Homo sapiens OX=9606 GN=RNF214 PE=1 SV=2	11	4	4	77.6	5	703	6.95	1	1					1	1
High	Q15631	Translin OS=Homo sapiens OX=9606 GN=TSN PE=1 SV=1	11	2	2	26.2	11	228	6.44	1		2	1	1		1		2	1	1
High	P48556	26S proteasome non-ATPase regulatory subunit 8 OS=Homo sapiens OX=9606 GN=PSMD8 PE=1 SV=2	11	3	3	39.6	7	350	9.7				2	2	1				2	2	1
High	Q9C0B1	Alpha-ketoglutarate-dependent dioxygenase FTO OS=Homo sapiens OX=9606 GN=FTO PE=1 SV=3	11	5	5	58.2	11	505	5.22		1	1					1	1
High	O00217	NADH dehydrogenase [ubiquinone] iron-sulfur protein 8, mitochondrial OS=Homo sapiens OX=9606 GN=NDUFS8 PE=1 SV=1	11	2	2	23.7	8	210	6.34	2	2	1	1	1	1	2	2	1	1	1	1
High	Q96T76	MMS19 nucleotide excision repair protein homolog OS=Homo sapiens OX=9606 GN=MMS19 PE=1 SV=2	11	3	3	113.2	3	1030	6.35	1		3				1		2
High	Q96ME7	Zinc finger protein 512 OS=Homo sapiens OX=9606 GN=ZNF512 PE=1 SV=2	11	3	3	64.6	7	567	9.76			1		1	1			1		1	1
High	P18031	Tyrosine-protein phosphatase non-receptor type 1 OS=Homo sapiens OX=9606 GN=PTPN1 PE=1 SV=1	11	4	4	49.9	14	435	6.27	3	2	1		1		3	2	1		1
High	P41227	N-alpha-acetyltransferase 10 OS=Homo sapiens OX=9606 GN=NAA10 PE=1 SV=1	11	4	4	26.4	20	235	5.64	1	1	1	1	1	2	1	1	1	1	1	2
High	Q9NR50	Translation initiation factor eIF-2B subunit gamma OS=Homo sapiens OX=9606 GN=EIF2B3 PE=1 SV=1	11	2	2	50.2	9	452	6.47	1	1	2	1	1		1	1	2	1	1
High	Q8WTV1	THAP domain-containing protein 3 OS=Homo sapiens OX=9606 GN=THAP3 PE=1 SV=1	11	4	4	27	28	239	10.24				1	2	1				1	2	1
High	Q9Y5Y2	Cytosolic Fe-S cluster assembly factor NUBP2 OS=Homo sapiens OX=9606 GN=NUBP2 PE=1 SV=1	11	3	3	28.8	23	271	5.83	2	2	2		1		2	2	2		1
High	Q9NZW5	Protein PALS2 OS=Homo sapiens OX=9606 GN=PALS2 PE=1 SV=2	11	3	2	61.1	6	540	6.18	2	2	1		1	1	2	2	1		1	1
High	Q5T8P6	RNA-binding protein 26 OS=Homo sapiens OX=9606 GN=RBM26 PE=1 SV=3	11	3	2	113.5	3	1007	9.16				1	2	1				1	2	1
High	Q7RTV0	PHD finger-like domain-containing protein 5A OS=Homo sapiens OX=9606 GN=PHF5A PE=1 SV=1	11	3	3	12.4	25	110	8.41				2	2	1				2	2	1
High	Q96JQ2	Calmin OS=Homo sapiens OX=9606 GN=CLMN PE=1 SV=1	11	3	3	111.6	3	1002	4.94	2	2	3			1	2	2	3			1
High	Q8WXE9	Stonin-2 OS=Homo sapiens OX=9606 GN=STON2 PE=1 SV=1	11	1	1	101.1	1	905	5.39	2	4	2				1	1	1
High	P48507	Glutamate--cysteine ligase regulatory subunit OS=Homo sapiens OX=9606 GN=GCLM PE=1 SV=1	11	4	4	30.7	19	274	6.02	1	1	3		1	1	1	1	3		1	1
High	P31151	Protein S100-A7 OS=Homo sapiens OX=9606 GN=S100A7 PE=1 SV=4	11	3	3	11.5	24	101	6.77				3	4	4				3	3	3
High	P67870	Casein kinase II subunit beta OS=Homo sapiens OX=9606 GN=CSNK2B PE=1 SV=1	11	3	3	24.9	20	215	5.55			1	2	2	1			1	2	2	1
High	P29317	Ephrin type-A receptor 2 OS=Homo sapiens OX=9606 GN=EPHA2 PE=1 SV=2	11	6	4	108.2	7	976	6.23		2	1	1	1	1		2	1	1	1	1
High	Q86VP1	Tax1-binding protein 1 OS=Homo sapiens OX=9606 GN=TAX1BP1 PE=1 SV=2	11	5	5	90.8	6	789	5.43	1	1	1		1		1	1	1		1
High	Q9UK59	Lariat debranching enzyme OS=Homo sapiens OX=9606 GN=DBR1 PE=1 SV=2	11	3	3	61.5	6	544	5.47	1	1	1	1	2	1	1	1	1	1	2	1
High	O14745	Na(+)/H(+) exchange regulatory cofactor NHE-RF1 OS=Homo sapiens OX=9606 GN=SLC9A3R1 PE=1 SV=4	11	3	3	38.8	11	358	5.77		1	2	1		1		1	2	1		1
High	P49458	Signal recognition particle 9 kDa protein OS=Homo sapiens OX=9606 GN=SRP9 PE=1 SV=2	11	2	2	10.1	22	86	7.97	1	2		1	1	2	1	2		1	1	2
High	Q96DV4	39S ribosomal protein L38, mitochondrial OS=Homo sapiens OX=9606 GN=MRPL38 PE=1 SV=2	11	3	3	44.6	10	380	7.53	1	1	2	1	1	1	1	1	2	1	1	1
High	Q9P270	SLAIN motif-containing protein 2 OS=Homo sapiens OX=9606 GN=SLAIN2 PE=1 SV=2	11	3	3	62.5	8	581	9.45		2	2		1	1		2	2		1	1
High	P61163	Alpha-centractin OS=Homo sapiens OX=9606 GN=ACTR1A PE=1 SV=1	11	3	3	42.6	11	376	6.64	2	1					2	1
High	Q01650	Large neutral amino acids transporter small subunit 1 OS=Homo sapiens OX=9606 GN=SLC7A5 PE=1 SV=2	11	3	3	55	8	507	7.72	1	1	1	2	1	1	1	1	1	2	1	1
High	P54920	Alpha-soluble NSF attachment protein OS=Homo sapiens OX=9606 GN=NAPA PE=1 SV=3	11	4	4	33.2	16	295	5.36	1	1			1	1	1	1			1	1
High	Q10570	Cleavage and polyadenylation specificity factor subunit 1 OS=Homo sapiens OX=9606 GN=CPSF1 PE=1 SV=2	11	5	5	160.8	4	1443	6.4		1			2			1			2
High	Q3ZAQ7	Vacuolar ATPase assembly integral membrane protein VMA21 OS=Homo sapiens OX=9606 GN=VMA21 PE=1 SV=1	11	2	2	11.3	22	101	7.24	1	1	1	1		1	1	1	1	1		1
High	P47813	Eukaryotic translation initiation factor 1A, X-chromosomal OS=Homo sapiens OX=9606 GN=EIF1AX PE=1 SV=2	11	2	2	16.5	15	144	5.24	1		1	2	2	2	1		1	2	2	2
High	Q9H2G2	STE20-like serine/threonine-protein kinase OS=Homo sapiens OX=9606 GN=SLK PE=1 SV=1	11	4	4	142.6	5	1235	5.15	1	1	2	1		1	1	1	2	1		1
High	Q93008	Probable ubiquitin carboxyl-terminal hydrolase FAF-X OS=Homo sapiens OX=9606 GN=USP9X PE=1 SV=4	11	7	4	290.3	3	2554	5.8	1	2	2				1	2	2
High	O60749	Sorting nexin-2 OS=Homo sapiens OX=9606 GN=SNX2 PE=1 SV=2	11	4	2	58.4	8	519	5.12	1				3		1				3
High	P04732	Metallothionein-1E OS=Homo sapiens OX=9606 GN=MT1E PE=1 SV=1	11	2	1	6	52	61	7.96	1	1	1	2	2	1	1	1	1	2	2	1
High	O14578	Citron Rho-interacting kinase OS=Homo sapiens OX=9606 GN=CIT PE=1 SV=2	11	4	4	231.3	2	2027	6.57	1	1		1	4	2	1	1		1	4	2
High	Q14596	Next to BRCA1 gene 1 protein OS=Homo sapiens OX=9606 GN=NBR1 PE=1 SV=3	11	2	2	107.3	3	966	5.12	1	1	2				1	1	1
High	Q14008	Cytoskeleton-associated protein 5 OS=Homo sapiens OX=9606 GN=CKAP5 PE=1 SV=3	11	3	3	225.4	1	2032	7.8			1		2	2			1		2	2
High	Q8NFQ8	Torsin-1A-interacting protein 2 OS=Homo sapiens OX=9606 GN=TOR1AIP2 PE=1 SV=1	11	3	3	51.2	9	470	4.96	1	1	1	1	1	1	1	1	1	1	1	1
High	Q99733	Nucleosome assembly protein 1-like 4 OS=Homo sapiens OX=9606 GN=NAP1L4 PE=1 SV=1	11	5	4	42.8	17	375	4.69		2	3	1	1			2	3	1	1
High	Q9H9A6	Leucine-rich repeat-containing protein 40 OS=Homo sapiens OX=9606 GN=LRRC40 PE=1 SV=1	11	3	3	68.2	5	602	6.43	1	1	1	3	2	2	1	1	1	3	2	2
High	O00264	Membrane-associated progesterone receptor component 1 OS=Homo sapiens OX=9606 GN=PGRMC1 PE=1 SV=3	11	3	3	21.7	16	195	4.7	1	1	1		1	1	1	1	1		1	1
High	Q96S19	Methyltransferase-like 26 OS=Homo sapiens OX=9606 GN=METTL26 PE=1 SV=2	11	4	4	22.6	24	204	7.83			2	1	2	1			2	1	2	1
High	P98175	RNA-binding protein 10 OS=Homo sapiens OX=9606 GN=RBM10 PE=1 SV=3	11	6	6	103.5	7	930	5.97
High	Q9H0E2	Toll-interacting protein OS=Homo sapiens OX=9606 GN=TOLLIP PE=1 SV=1	11	3	3	30.3	15	274	5.97	3	3	2				3	3	2
High	Q00059	Transcription factor A, mitochondrial OS=Homo sapiens OX=9606 GN=TFAM PE=1 SV=1	11	2	2	29.1	7	246	9.72			1	1	1	2			1	1	1	2
High	Q2TAL8	Transcriptional regulator QRICH1 OS=Homo sapiens OX=9606 GN=QRICH1 PE=1 SV=1	11	3	3	86.4	3	776	5.87				2	1	2				2	1	2
High	Q13643	Four and a half LIM domains protein 3 OS=Homo sapiens OX=9606 GN=FHL3 PE=1 SV=4	11	5	5	31.2	20	280	6.2				1	3	1				1	3	1
High	P01100	Protein c-Fos OS=Homo sapiens OX=9606 GN=FOS PE=1 SV=1	11	3	3	40.7	11	380	4.87		1			2			1			2
High	Q00796	Sorbitol dehydrogenase OS=Homo sapiens OX=9606 GN=SORD PE=1 SV=4	11	4	4	38.3	15	357	7.97	1	1	2	1		1	1	1	2	1		1
High	Q92667	A-kinase anchor protein 1, mitochondrial OS=Homo sapiens OX=9606 GN=AKAP1 PE=1 SV=1	11	3	3	97.3	4	903	4.94	1		1	1	1	1	1		1	1	1	1
High	P29144	Tripeptidyl-peptidase 2 OS=Homo sapiens OX=9606 GN=TPP2 PE=1 SV=4	11	6	6	138.3	7	1249	6.32		1			1			1			1
High	Q8N3C0	Activating signal cointegrator 1 complex subunit 3 OS=Homo sapiens OX=9606 GN=ASCC3 PE=1 SV=3	11	5	5	251.3	3	2202	7.09	2	3	1				2	3	1
High	P19388	DNA-directed RNA polymerases I, II, and III subunit RPABC1 OS=Homo sapiens OX=9606 GN=POLR2E PE=1 SV=4	11	4	4	24.5	23	210	5.95			1	1		2			1	1		2
High	O95837	Guanine nucleotide-binding protein subunit alpha-14 OS=Homo sapiens OX=9606 GN=GNA14 PE=1 SV=1	11	4	1	41.5	9	355	6.07		1	1	3	1	2		1	1	3	1	2
High	P78406	mRNA export factor RAE1 OS=Homo sapiens OX=9606 GN=RAE1 PE=1 SV=1	11	6	6	40.9	24	368	7.83	1				1		1				1
High	Q9HBL0	Tensin-1 OS=Homo sapiens OX=9606 GN=TNS1 PE=1 SV=2	11	3	2	185.6	2	1735	7.75	1	2	1	1	2	1	1	1	1	1	2	1
High	Q659A1	Little elongation complex subunit 2 OS=Homo sapiens OX=9606 GN=ICE2 PE=1 SV=2	11	5	5	109.9	5	982	7.09				3	3	3				3	3	3
High	Q9H4A3	Serine/threonine-protein kinase WNK1 OS=Homo sapiens OX=9606 GN=WNK1 PE=1 SV=2	11	5	5	250.6	2	2382	6.34			1		1	1			1		1	1
High	Q9NPG3	Ubinuclein-1 OS=Homo sapiens OX=9606 GN=UBN1 PE=1 SV=2	11	3	3	121.4	3	1134	9.33	2	2	1	1	1	1	2	2	1	1	1	1
High	Q9H6Z4	Ran-binding protein 3 OS=Homo sapiens OX=9606 GN=RANBP3 PE=1 SV=1	11	3	3	60.2	7	567	4.78	1	1	1	1	1	1	1	1	1	1	1	1
High	Q9NYL2	Mitogen-activated protein kinase kinase kinase 20 OS=Homo sapiens OX=9606 GN=MAP3K20 PE=1 SV=3	11	4	4	91.1	5	800	7.87	2	1	1	1	1	1	2	1	1	1	1	1
High	Q16186	Proteasomal ubiquitin receptor ADRM1 OS=Homo sapiens OX=9606 GN=ADRM1 PE=1 SV=2	11	3	3	42.1	11	407	5.07			1	2	1	1			1	2	1	1
High	Q9UKN8	General transcription factor 3C polypeptide 4 OS=Homo sapiens OX=9606 GN=GTF3C4 PE=1 SV=2	11	4	4	91.9	6	822	6.65	1	1	1		1		1	1	1		1
High	O75494	Serine/arginine-rich splicing factor 10 OS=Homo sapiens OX=9606 GN=SRSF10 PE=1 SV=1	11	4	4	31.3	16	262	11.27	2	1	1	1		1	2	1	1	1		1
High	Q8TBB5	Kelch domain-containing protein 4 OS=Homo sapiens OX=9606 GN=KLHDC4 PE=1 SV=1	11	2	2	57.9	4	520	5.72		1	1	1	1	1		1	1	1	1	1
High	P01111	GTPase NRas OS=Homo sapiens OX=9606 GN=NRAS PE=1 SV=1	11	3	3	21.2	17	189	5.17	1	1	3		1		1	1	2		1
High	P30566	Adenylosuccinate lyase OS=Homo sapiens OX=9606 GN=ADSL PE=1 SV=2	11	4	4	54.9	13	484	7.11			2	1	1	1			2	1	1	1
High	Q9H307	Pinin OS=Homo sapiens OX=9606 GN=PNN PE=1 SV=5	11	3	3	81.6	4	717	7.14	1		1	1	3	2	1		1	1	3	2
High	P02676	SWISS-PROT:P02676 (Bos taurus) similar to Fibrinogen beta chain precursor	11	4	1	56.4	8	495	8.22				4	3	4				4	3	4
High	Q99613	Eukaryotic translation initiation factor 3 subunit C OS=Homo sapiens OX=9606 GN=EIF3C PE=1 SV=1	11	3	3	105.3	4	913	5.68	2	2	1				2	2	1
High	Q9BPW8	Protein NipSnap homolog 1 OS=Homo sapiens OX=9606 GN=NIPSNAP1 PE=1 SV=1	11	2	2	33.3	7	284	9.31	2	1	1	1	1	1	2	1	1	1	1	1
High	P31350	Ribonucleoside-diphosphate reductase subunit M2 OS=Homo sapiens OX=9606 GN=RRM2 PE=1 SV=1	11	6	6	44.8	22	389	5.38	1	2	1		1	1	1	2	1		1	1
High	O94929	Actin-binding LIM protein 3 OS=Homo sapiens OX=9606 GN=ABLIM3 PE=1 SV=3	11	5	5	77.8	10	683	8.54	3	2	3				3	2	3
High	Q9BZL4	Protein phosphatase 1 regulatory subunit 12C OS=Homo sapiens OX=9606 GN=PPP1R12C PE=1 SV=1	11	4	4	84.8	10	782	5.57	1	2	3				1	2	3
High	Q9NVI1	Fanconi anemia group I protein OS=Homo sapiens OX=9606 GN=FANCI PE=1 SV=4	10	3	3	149.2	3	1328	6.74	1	1	1		1		1	1	1		1
High	O95251	Histone acetyltransferase KAT7 OS=Homo sapiens OX=9606 GN=KAT7 PE=1 SV=1	10	3	2	70.6	6	611	8.85		1		1	1	1		1		1	1	1
High	Q9UQ88	Cyclin-dependent kinase 11A OS=Homo sapiens OX=9606 GN=CDK11A PE=1 SV=4	10	5	4	91.3	7	783	5.36					4	1					4	1
High	Q9NPE3	H/ACA ribonucleoprotein complex subunit 3 OS=Homo sapiens OX=9606 GN=NOP10 PE=1 SV=1	10	2	2	7.7	44	64	9.99			2	1	1	1			2	1	1	1
High	O75165	DnaJ homolog subfamily C member 13 OS=Homo sapiens OX=9606 GN=DNAJC13 PE=1 SV=5	10	6	6	254.3	4	2243	6.74	4	2	2				2	2	2
High	O60343	TBC1 domain family member 4 OS=Homo sapiens OX=9606 GN=TBC1D4 PE=1 SV=2	10	6	6	146.5	6	1298	7.01	1						1
High	P98172	Ephrin-B1 OS=Homo sapiens OX=9606 GN=EFNB1 PE=1 SV=1	10	2	2	38	9	346	8.94	1	1	1	2		2	1	1	1	2		2
High	Q9H8H2	Probable ATP-dependent RNA helicase DDX31 OS=Homo sapiens OX=9606 GN=DDX31 PE=1 SV=2	10	5	5	94	6	851	9.99
High	Q9UNH7	Sorting nexin-6 OS=Homo sapiens OX=9606 GN=SNX6 PE=1 SV=1	10	3	3	46.6	9	406	6.16			2	2	3	1			2	1	2	1
High	P16333	Cytoplasmic protein NCK1 OS=Homo sapiens OX=9606 GN=NCK1 PE=1 SV=1	10	3	3	42.8	13	377	6.47	3	3	3				3	3	3
High	P62273	40S ribosomal protein S29 OS=Homo sapiens OX=9606 GN=RPS29 PE=1 SV=2	10	1	1	6.7	13	56	10.13	1	1	1	2	1	1	1	1	1	1	1	1
High	Q06265	Exosome complex component RRP45 OS=Homo sapiens OX=9606 GN=EXOSC9 PE=1 SV=3	10	2	2	48.9	5	439	5.29				2	2	1				2	2	1
High	P01859	Immunoglobulin heavy constant gamma 2 OS=Homo sapiens OX=9606 GN=IGHG2 PE=1 SV=2	10	2	1	35.9	6	326	7.59		1		2	2	2		1		2	2	2
High	Q04760	Lactoylglutathione lyase OS=Homo sapiens OX=9606 GN=GLO1 PE=1 SV=4	10	4	4	20.8	23	184	5.31	2	3	1				2	3	1
High	O43818	U3 small nucleolar RNA-interacting protein 2 OS=Homo sapiens OX=9606 GN=RRP9 PE=1 SV=1	10	2	2	51.8	4	475	7.85				1	1	2				1	1	2
High	O75376	Nuclear receptor corepressor 1 OS=Homo sapiens OX=9606 GN=NCOR1 PE=1 SV=2	10	6	6	270	4	2440	7.11					1						1
High	Q9Y6Q5	AP-1 complex subunit mu-2 OS=Homo sapiens OX=9606 GN=AP1M2 PE=1 SV=4	10	2	2	48.1	4	423	8.22	2	2	2				2	2	2
High	Q9Y6K9	NF-kappa-B essential modulator OS=Homo sapiens OX=9606 GN=IKBKG PE=1 SV=2	10	2	2	48.2	7	419	5.71	2	1	2		1		2	1	2		1
High	P53582	Methionine aminopeptidase 1 OS=Homo sapiens OX=9606 GN=METAP1 PE=1 SV=2	10	2	2	43.2	5	386	7.17	1	1	1		1	1	1	1	1		1	1
High	Q13356	RING-type E3 ubiquitin-protein ligase PPIL2 OS=Homo sapiens OX=9606 GN=PPIL2 PE=1 SV=1	10	5	5	58.8	12	520	8.78	1	1	1	1	1	1	1	1	1	1	1	1
High	Q9H2U1	ATP-dependent DNA/RNA helicase DHX36 OS=Homo sapiens OX=9606 GN=DHX36 PE=1 SV=2	10	4	4	114.7	5	1008	7.68		1	2		1	1		1	2		1	1
High	Q9Y6M4	Casein kinase I isoform gamma-3 OS=Homo sapiens OX=9606 GN=CSNK1G3 PE=1 SV=2	10	3	1	51.4	6	447	9.22	2	2	3				1	1	2
High	Q96S97	Myeloid-associated differentiation marker OS=Homo sapiens OX=9606 GN=MYADM PE=1 SV=2	10	2	2	35.3	10	322	8.15	1	1	1			1	1	1	1			1
High	Q86W42	THO complex subunit 6 homolog OS=Homo sapiens OX=9606 GN=THOC6 PE=1 SV=1	10	5	5	37.5	18	341	7.43				1	1					1	1
High	Q9UKX7	Nuclear pore complex protein Nup50 OS=Homo sapiens OX=9606 GN=NUP50 PE=1 SV=2	10	4	4	50.1	15	468	7.06			1	1					1	1
High	P60228	Eukaryotic translation initiation factor 3 subunit E OS=Homo sapiens OX=9606 GN=EIF3E PE=1 SV=1	10	5	5	52.2	15	445	6.04	2	1	2				2	1	2
High	Q9NPH0	Lysophosphatidic acid phosphatase type 6 OS=Homo sapiens OX=9606 GN=ACP6 PE=1 SV=3	10	4	4	48.9	12	428	6.47					1						1
High	P49736	DNA replication licensing factor MCM2 OS=Homo sapiens OX=9606 GN=MCM2 PE=1 SV=4	10	2	2	101.8	3	904	5.52	1	2	1	1	1		1	2	1	1	1
High	Q6DD87	Zinc finger protein 787 OS=Homo sapiens OX=9606 GN=ZNF787 PE=1 SV=4	10	4	4	40.4	15	382	7.96		1	1		1	1		1	1		1	1
High	Q9BQ61	Telomerase RNA component interacting RNase OS=Homo sapiens OX=9606 GN=TRIR PE=1 SV=1	10	2	2	18.4	12	176	9.44	1	1	1	1	2	1	1	1	1	1	2	1
High	P27216	Annexin A13 OS=Homo sapiens OX=9606 GN=ANXA13 PE=1 SV=3	10	4	3	35.4	15	316	5.6	1	1	1	1			1	1	1	1
High	P27448	MAP/microtubule affinity-regulating kinase 3 OS=Homo sapiens OX=9606 GN=MARK3 PE=1 SV=5	10	4	1	84.4	6	753	9.57	2	1	1				2	1	1
High	Q7Z3C6	Autophagy-related protein 9A OS=Homo sapiens OX=9606 GN=ATG9A PE=1 SV=3	10	3	3	94.4	5	839	6.67	3	3	1				3	3	1
High	Q9NTI5	Sister chromatid cohesion protein PDS5 homolog B OS=Homo sapiens OX=9606 GN=PDS5B PE=1 SV=1	10	4	4	164.6	3	1447	8.47	2	2	2				2	2	1
High	Q9Y512	Sorting and assembly machinery component 50 homolog OS=Homo sapiens OX=9606 GN=SAMM50 PE=1 SV=3	10	5	5	51.9	18	469	6.9	1	1			1		1	1			1
High	A1L0T0	2-hydroxyacyl-CoA lyase 2 OS=Homo sapiens OX=9606 GN=ILVBL PE=1 SV=2	10	6	6	67.8	19	632	8.15	1	1	2				1	1	2
High	O75489	NADH dehydrogenase [ubiquinone] iron-sulfur protein 3, mitochondrial OS=Homo sapiens OX=9606 GN=NDUFS3 PE=1 SV=1	10	4	4	30.2	20	264	7.5	2	2	2		1	1	2	2	2		1	1
High	P52815	39S ribosomal protein L12, mitochondrial OS=Homo sapiens OX=9606 GN=MRPL12 PE=1 SV=2	10	2	2	21.3	11	198	8.87				1	2	1				1	2	1
High	P61966	AP-1 complex subunit sigma-1A OS=Homo sapiens OX=9606 GN=AP1S1 PE=1 SV=1	10	3	3	18.7	20	158	5.73	1	1	1	1	1	1	1	1	1	1	1	1
High	Q15025	TNFAIP3-interacting protein 1 OS=Homo sapiens OX=9606 GN=TNIP1 PE=1 SV=2	10	4	4	71.8	9	636	6.62	1	1	2				1	1	2
High	Q8IX12	Cell division cycle and apoptosis regulator protein 1 OS=Homo sapiens OX=9606 GN=CCAR1 PE=1 SV=2	10	2	2	132.7	1	1150	5.76	1	1	1		2		1	1	1		2
High	Q9BYN8	28S ribosomal protein S26, mitochondrial OS=Homo sapiens OX=9606 GN=MRPS26 PE=1 SV=1	10	5	5	24.2	22	205	10.39						1						1
High	Q96CP2	FLYWCH family member 2 OS=Homo sapiens OX=9606 GN=FLYWCH2 PE=1 SV=1	10	2	2	14.6	16	140	8.46	2	1	2	1	1		2	1	2	1	1
High	Q6IA17	Single Ig IL-1-related receptor OS=Homo sapiens OX=9606 GN=SIGIRR PE=1 SV=3	10	4	4	45.7	14	410	6.46		1	1					1	1
High	Q13011	Delta(3,5)-Delta(2,4)-dienoyl-CoA isomerase, mitochondrial OS=Homo sapiens OX=9606 GN=ECH1 PE=1 SV=2	10	3	3	35.8	11	328	8	1	1	3	1		1	1	1	3	1		1
High	Q9UL25	Ras-related protein Rab-21 OS=Homo sapiens OX=9606 GN=RAB21 PE=1 SV=3	10	2	2	24.3	9	225	7.94		1	2		1	1		1	2		1	1
High	Q15019	Septin-2 OS=Homo sapiens OX=9606 GN=SEPTIN2 PE=1 SV=1	10	4	4	41.5	11	361	6.6	3	2	2				3	2	2
High	Q9BVJ7	Dual specificity protein phosphatase 23 OS=Homo sapiens OX=9606 GN=DUSP23 PE=1 SV=1	10	3	3	16.6	26	150	8.21				1	1	1				1	1	1
High	P49674	Casein kinase I isoform epsilon OS=Homo sapiens OX=9606 GN=CSNK1E PE=1 SV=1	10	3	3	47.3	9	416	9.66			1		1	1			1		1	1
High	Q13206	Probable ATP-dependent RNA helicase DDX10 OS=Homo sapiens OX=9606 GN=DDX10 PE=1 SV=2	10	1	1	100.8	2	875	8.63	1	1	1	1		1	1	1	1	1		1
High	Q9Y3P9	Rab GTPase-activating protein 1 OS=Homo sapiens OX=9606 GN=RABGAP1 PE=1 SV=3	10	3	3	121.7	4	1069	5.25	1	1	1		1		1	1	1		1
High	A0MZ66	Shootin-1 OS=Homo sapiens OX=9606 GN=SHTN1 PE=1 SV=4	10	3	3	71.6	6	631	5.33	1	1	2		1	2	1	1	2		1	2
High	Q9Y6D6	Brefeldin A-inhibited guanine nucleotide-exchange protein 1 OS=Homo sapiens OX=9606 GN=ARFGEF1 PE=1 SV=2	10	3	2	208.6	1	1849	5.85	1	1	2				1	1	2
High	O76031	ATP-dependent Clp protease ATP-binding subunit clpX-like, mitochondrial OS=Homo sapiens OX=9606 GN=CLPX PE=1 SV=2	10	7	7	69.2	13	633	7.58	1	4	3				1	4	3
High	Q9H0U6	39S ribosomal protein L18, mitochondrial OS=Homo sapiens OX=9606 GN=MRPL18 PE=1 SV=1	10	2	2	20.6	9	180	9.54	2	1	2		1		2	1	2		1
High	O60684	Importin subunit alpha-7 OS=Homo sapiens OX=9606 GN=KPNA6 PE=1 SV=1	10	4	1	60	10	536	4.98	1	3			1		1	3			1
High	Q86Y56	Dynein axonemal assembly factor 5 OS=Homo sapiens OX=9606 GN=DNAAF5 PE=1 SV=4	10	5	5	93.5	9	855	6.42	1	2	1				1	2	1
High	Q6P1X5	Transcription initiation factor TFIID subunit 2 OS=Homo sapiens OX=9606 GN=TAF2 PE=1 SV=3	10	3	3	136.9	4	1199	8.19	1	1	2				1	1	2
High	Q9Y3C6	Peptidyl-prolyl cis-trans isomerase-like 1 OS=Homo sapiens OX=9606 GN=PPIL1 PE=1 SV=1	10	2	2	18.2	19	166	7.99	1	1	1	1	1	1	1	1	1	1	1	1
High	Q9P267	Methyl-CpG-binding domain protein 5 OS=Homo sapiens OX=9606 GN=MBD5 PE=1 SV=3	10	3	3	159.8	4	1494	8.98				1	1					1	1
High	Q6PD62	RNA polymerase-associated protein CTR9 homolog OS=Homo sapiens OX=9606 GN=CTR9 PE=1 SV=1	10	3	3	133.4	3	1173	6.77					1	1					1	1
High	Q92665	28S ribosomal protein S31, mitochondrial OS=Homo sapiens OX=9606 GN=MRPS31 PE=1 SV=3	10	3	3	45.3	7	395	9.29			1	2	1	2			1	2	1	2
High	Q16539	Mitogen-activated protein kinase 14 OS=Homo sapiens OX=9606 GN=MAPK14 PE=1 SV=3	10	2	1	41.3	4	360	5.78		1	1	1		2		1	1	1		2
High	Q6P161	39S ribosomal protein L54, mitochondrial OS=Homo sapiens OX=9606 GN=MRPL54 PE=1 SV=1	10	1	1	15.8	7	138	9.6		1	1	1	1	1		1	1	1	1	1
High	P17480	Nucleolar transcription factor 1 OS=Homo sapiens OX=9606 GN=UBTF PE=1 SV=1	10	6	6	89.4	10	764	5.81	2	2	1			1	2	2	1			1
High	P51798	H(+)/Cl(-) exchange transporter 7 OS=Homo sapiens OX=9606 GN=CLCN7 PE=1 SV=2	10	3	3	88.6	3	805	8.43	3	3	1	1			3	3	1	1
High	Q92615	La-related protein 4B OS=Homo sapiens OX=9606 GN=LARP4B PE=1 SV=3	10	6	6	80.5	9	738	6.92	1	1	1		1		1	1	1		1
High	Q5T9L3	Protein wntless homolog OS=Homo sapiens OX=9606 GN=WLS PE=1 SV=2	10	3	3	62.2	7	541	7.36	2	2	2				2	2	2
High	Q8NI36	WD repeat-containing protein 36 OS=Homo sapiens OX=9606 GN=WDR36 PE=1 SV=1	10	6	6	105.3	8	951	7.53			1		2				1		2
High	Q9Y5X3	Sorting nexin-5 OS=Homo sapiens OX=9606 GN=SNX5 PE=1 SV=1	10	2	2	46.8	4	404	6.76	2	1	1	1	1	1	2	1	1	1	1	1
High	Q9HCP0	Casein kinase I isoform gamma-1 OS=Homo sapiens OX=9606 GN=CSNK1G1 PE=1 SV=1	10	3	1	48.5	9	422	9.01	2	2	2				1	1	1
High	P02795	Metallothionein-2 OS=Homo sapiens OX=9606 GN=MT2A PE=1 SV=1	10	2	1	6	52	61	7.83	1	1	1	1	2	1	1	1	1	1	2	1
High	P12270	Nucleoprotein TPR OS=Homo sapiens OX=9606 GN=TPR PE=1 SV=3	10	3	3	267.1	2	2363	5.02	1	1	1				1	1	1
High	P53680	AP-2 complex subunit sigma OS=Homo sapiens OX=9606 GN=AP2S1 PE=1 SV=2	10	2	2	17	11	142	6.18	2	1	1	1	1	1	2	1	1	1	1	1
High	Q13907	Isopentenyl-diphosphate Delta-isomerase 1 OS=Homo sapiens OX=9606 GN=IDI1 PE=1 SV=2	10	3	3	26.3	18	227	6.34	2	3	3				2	3	3
High	P04040	Catalase OS=Homo sapiens OX=9606 GN=CAT PE=1 SV=3	10	4	4	59.7	10	527	7.39	2	2	2		1		2	2	2		1
High	O00192	Armadillo repeat protein deleted in velo-cardio-facial syndrome OS=Homo sapiens OX=9606 GN=ARVCF PE=1 SV=1	10	3	3	104.6	6	962	6.81	2	2	2				2	2	2
High	Q96CF2	Charged multivesicular body protein 4c OS=Homo sapiens OX=9606 GN=CHMP4C PE=1 SV=1	10	2	2	26.4	11	233	6.07	1	2	1				1	1	1
High	Q05209	Tyrosine-protein phosphatase non-receptor type 12 OS=Homo sapiens OX=9606 GN=PTPN12 PE=1 SV=3	10	7	7	88.1	12	780	5.62	1	1	1		2	2	1	1	1		2	2
High	Q9Y4G6	Talin-2 OS=Homo sapiens OX=9606 GN=TLN2 PE=1 SV=4	9	3	1	271.4	1	2542	5.57	1		1		1		1		1		1
High	Q6ZMG9	Ceramide synthase 6 OS=Homo sapiens OX=9606 GN=CERS6 PE=1 SV=1	9	1	1	44.9	2	384	7.65	1	1	1	1	1	1	1	1	1	1	1	1
High	Q92567	Protein FAM168A OS=Homo sapiens OX=9606 GN=FAM168A PE=1 SV=2	9	2	2	26.2	7	244	8.98	1	1	1	1	1	2	1	1	1	1	1	2
High	P80297	Metallothionein-1X OS=Homo sapiens OX=9606 GN=MT1X PE=1 SV=1	9	2	1	6.1	52	61	7.96	1	1	1	2	1		1	1	1	2	1
High	Q9BVM4	Gamma-glutamylaminecyclotransferase OS=Homo sapiens OX=9606 GN=GGACT PE=1 SV=2	9	2	1	17.3	14	153	6.87				1	1	1				1	1	1
High	Q9NXE4	Sphingomyelin phosphodiesterase 4 OS=Homo sapiens OX=9606 GN=SMPD4 PE=1 SV=3	9	4	4	97.7	7	866	8.27	2	1	2				2	1	2
High	P62891	60S ribosomal protein L39 OS=Homo sapiens OX=9606 GN=RPL39 PE=1 SV=2	9	1	1	6.4	20	51	12.56	1	1	1	1	1	1	1	1	1	1	1	1
High	Q03393	6-pyruvoyl tetrahydrobiopterin synthase OS=Homo sapiens OX=9606 GN=PTS PE=1 SV=1	9	3	3	16.4	21	145	6.68	1	1	1	1	1	1	1	1	1	1	1	1
High	Q16658	Fascin OS=Homo sapiens OX=9606 GN=FSCN1 PE=1 SV=3	9	2	2	54.5	5	493	7.24	1	1	1	2	2	2	1	1	1	2	2	2
High	Q96N66	Lysophospholipid acyltransferase 7 OS=Homo sapiens OX=9606 GN=MBOAT7 PE=1 SV=2	9	3	3	52.7	8	472	8.97	1	1	1				1	1	1
High	Q9Y2S7	Polymerase delta-interacting protein 2 OS=Homo sapiens OX=9606 GN=POLDIP2 PE=1 SV=1	9	4	4	42	14	368	8.63	1	1			1	1	1	1			1	1
High	Q9BXW7	Haloacid dehalogenase-like hydrolase domain-containing 5 OS=Homo sapiens OX=9606 GN=HDHD5 PE=1 SV=1	9	3	3	46.3	9	423	8.13		1		1		1		1		1		1
High	P36405	ADP-ribosylation factor-like protein 3 OS=Homo sapiens OX=9606 GN=ARL3 PE=1 SV=2	9	4	4	20.4	35	182	7.24	1	2					1	2
High	Q6P6C2	RNA demethylase ALKBH5 OS=Homo sapiens OX=9606 GN=ALKBH5 PE=1 SV=2	9	2	2	44.2	5	394	9.09			1	2	2	1			1	2	2	1
[truncated: 1,492 more rows]
